# Supplementary material for: Uncovering Driver DNA Methylation Events in Nonsmoking Early Stage Lung Adenocarcinoma
Source: Hindawi journal article supplement (doi:10.1155/2016/2090286), 2016-01-01
Supplement: f1 [file 2090286.f1.xlsx]

## Sheet: Candidate driver gene list
Gene symbol	Entrez ID	Expression:NTL vs. overall Tumors		Expression: T-DM vs.matched NTL		Exprerssion: T-NDM vs. matched NTL		Significance of mean fold change		DNA methylation: NTL vs. overall tumors		DNA methylation: T-DM vs. matched NTL		DNA methylation: T-NDM vs. matched NTL		Significance of mean beta value differeces
		BH pvalue	mean fold change (log2)	BH pvalue	mean fold change (log2)	BH pvalue	mean fold change (log2)	T-DM vs.NTL	T-DM vs.T-NDM	kernel distribution pvalue	mean beta value difference	kernel distribution pvalue	mean beta value difference	kernel distribution pvalue	mean beta value difference	T-DM vs.NTL	T-DM vs.T-NDM
ACAA2	10449	0.000449772	-0.084123	0.00137211	-0.180393	0.026427	-0.0539963	0.0076837	0.00578771	0.000343892	0.0244129	3.33067e-16	0.114285	0.999973	-0.00202022	3.88396e-07	3.88396e-07
ACADL	33	1.31851e-08	-0.175896	4.9953e-05	-0.214905	0.000350401	-0.152315	0.127089	0.185732	0.0772421	0.0834736	0.00564617	0.177636	0.661975	0.0182842	0.00138212	0.00138212
ACTA2	59	7.18714e-08	-0.127362	3.04153e-06	-0.149246	0.00311844	-0.103616	0.100804	0.171813	0.0396485	0.0838269	0.00191706	0.122444	3.33067e-16	0.0162466	6.72218e-05	6.72218e-05
ACVRL1	94	8.37862e-15	-0.278878	1.63179e-15	-0.266724	-1	-1	1	0	8.92812e-07	0.20251	8.92812e-07	0.20251	-1	-1	1	0
AFF3	3899	1.26814e-11	-0.090422	1.00195e-05	-0.100207	1.32518e-06	-0.0841668	0.481922	0.48923	0.136962	-0.0475735	2.16254e-05	-0.152215	1.05502e-13	0.0248705	5.10755e-06	5.10755e-06
AGER	177	6.10236e-22	-0.498218	8.25454e-14	-0.537327	9.70052e-09	-0.427631	0.0574216	0.091836	0.0142708	0.115159	0.00109405	0.135596	3.33067e-16	0.0713653	0.0125876	0.0125876
AGR2	10551	2.56649e-05	0.242099	2.56649e-05	0.242099	-1	-1	1	0	2.47337e-09	-0.229669	2.47337e-09	-0.229669	-1	-1	1	0
AHR	196	1.00812e-06	0.0962991	8.26241e-07	0.103035	-1	-1	1	0	5.17938e-12	-0.189494	4.90051e-15	-0.21359	1	0.0514621	0.002153	0
APOLD1	81575	1.03905e-06	-0.224928	2.10758e-05	-0.210393	0.057265	-0.325756	0.770707	0.0864782	0.0109538	0.130281	0.00731413	0.134687	3.33067e-16	0.102373	0.373816	0.373816
AQP9	366	6.71212e-12	-0.273758	7.19458e-05	-0.33591	7.74707e-09	-0.263377	0.207601	0.292472	0.415054	0.00823203	0.00064083	0.103605	1	-0.0275327	0.0010124	0.0010124
ARID3A	1820	0.00542199	0.0853511	0.0066211	0.170067	0.166338	0.0467956	0.00735022	0.00291619	0.258133	0.021078	0.00420928	0.168012	1	-0.0340221	0.000799475	0.000799475
ARL14	80117	0.0238635	0.104479	0.024167	0.174139	0.731488	0.00858141	0.0438379	0.0528659	3.86546e-05	-0.103326	1.36814e-26	-0.213423	0.998536	0.02879	1.27087e-10	1.27087e-10
B3GALT3	8706	5.60314e-08	-0.1807	0.000112371	-0.270513	1.02172e-05	-0.167268	0.0734713	0.136402	0.224513	0.0328413	0.000544257	0.122084	0.931318	-0.00062476	0.00952783	0.00952783
BOP1	23246	2.77835e-06	0.123879	2.12428e-05	0.219216	0.000418833	0.0917998	0.0157958	0.00729599	0.108301	0.0214465	3.33067e-16	0.100803	0.999999	-0.00189379	2.05565e-09	2.05565e-09
BTBD3	22903	0.000401744	-0.0566965	0.000336631	-0.112466	0.038544	-0.0353667	0.0027128	0.00462231	0.236905	0.0694922	1.95031e-05	0.275702	0.95901	-0.00783631	3.53717e-05	3.53717e-05
BZRAP1	9256	0.00137586	0.0858829	0.00130218	0.100958	0.541301	0.030269	0.283977	0.268366	3.21965e-15	0.208862	3.33067e-16	0.256127	3.33067e-16	-0.00382631	3.69287e-06	3.69287e-06
CA9	768	0.000518508	0.250505	0.00138816	0.47342	0.0537643	0.115277	0.00107536	0.000715849	0.0587631	-0.0865866	7.03185e-09	-0.260034	1.41026e-22	-0.00564467	7.2139e-12	7.2139e-12
CCL23	6368	6.34046e-11	-0.252732	1.71434e-07	-0.270068	7.80446e-05	-0.247058	0.46762	0.616665	0.0684479	0.08115	0.000111111	0.183932	0.419717	-0.0216324	1.15916e-10	1.15916e-10
CCNA1	8900	0.000173865	-0.0971872	0.000140411	-0.101136	0.780771	-0.00632327	0.681076	0.154864	3.33067e-16	0.244898	3.33067e-16	0.300976	3.33067e-16	-0.00745399	7.78013e-06	7.78013e-06
CD163	9332	3.63399e-09	-0.224574	0.00592411	-0.142631	7.96131e-10	-0.310276	0.0473757	0.0122149	0.04407	-0.0572717	4.68923e-08	-0.147234	1.04231e-34	0.00500952	4.21526e-06	4.21526e-06
CD59	966	3.87778e-05	-0.0935679	0.000187255	-0.152313	0.0124145	-0.0691912	0.0204865	0.0255799	0.0918389	0.0973759	0.000736771	0.208519	0.949028	0.045509	0.00426715	0.00426715
CDH1	999	3.46691e-10	0.17268	6.99303e-07	0.215965	4.92783e-05	0.148648	0.0285776	0.0258389	0.107298	0.0593745	1.16549e-05	0.166152	0.847989	0.00954514	1.01318e-06	1.01318e-06
CDH13	1012	1.32357e-10	-0.211195	2.64984e-09	-0.204119	-1	-1	1	0	2.44793e-23	-0.191951	4.3069e-29	-0.210391	1	-0.00754443	0.528997	0.00294607
CDO1	1036	1.0554e-13	-0.286574	1.0554e-13	-0.286574	-1	-1	1	0	3.33067e-16	0.304287	3.33067e-16	0.304287	-1	-1	1	0
CELSR3	1951	2.60967e-07	0.259177	1.14123e-07	0.314194	0.0930924	0.100596	0.00269576	0.0114791	3.33067e-16	0.189823	3.33067e-16	0.248488	3.33067e-16	0.0333823	0.00101362	0.00101362
CFI	3426	0.670302	-0.0118511	0.017949	-0.144773	0.648215	0.0237888	0.0286152	0.0315507	0.306865	0.0359244	0.000132123	0.224844	1	-0.0196404	7.85561e-05	7.85561e-05
CLCN7	1186	5.28997e-07	0.0968597	0.00145732	0.126124	3.9178e-05	0.0838673	0.0716456	0.0744406	0.0834542	-0.0672983	1.05843e-05	-0.197383	7.94742e-36	-0.00659228	0.00192778	0.00192778
CLEC1A	51267	2.67361e-21	-0.303828	6.343e-13	-0.310315	1.54043e-09	-0.291744	0.634612	0.540598	0.0100237	0.139537	0.000744963	0.16496	8.02691e-14	0.0950475	0.0304477	0.0304477
CLIC3	9022	2.84618e-07	-0.252375	2.84618e-07	-0.252375	-1	-1	1	0	2.17878e-05	-0.188582	2.17878e-05	-0.188582	-1	-1	1	0
COL17A1	1308	6.90181e-05	0.283618	3.46326e-05	0.321489	0.772321	0.00202308	0.259271	0.00117639	0.00018853	-0.188279	2.79765e-07	-0.217116	1	-0.00564893	0.000522725	0.000522725
COL5A2	1290	0.000180626	0.155217	5.44857e-05	0.173738	0.918336	0.0252641	0.642249	0.00616294	1.95851e-07	0.291938	2.92802e-11	0.330942	3.33067e-16	0.0449108	0.00104223	0.00104223
COL7A1	1294	0.000699656	0.174439	0.00254442	0.115531	0.0216161	0.265402	0.0465239	0.0685365	0.0287517	0.1234	2.42741e-05	0.195723	0.0333633	-0.00316431	0.000758344	0.000758344
CP	1356	0.00167773	0.162863	0.00140662	0.227638	0.492984	0.0329653	0.0474309	0.0539414	0.00131588	-0.191619	3.73638e-07	-0.279944	1	-0.0370496	3.58362e-06	3.58362e-06
CRYAB	1410	8.50449e-17	-0.380098	8.20072e-11	-0.414266	7.26807e-08	-0.336856	0.134191	0.153257	0.124743	0.0432953	0.025597	0.109493	0.0155729	-0.0361422	1.71531e-05	1.71531e-05
CUEDC1	404093	4.68786e-06	0.145509	5.13188e-06	0.156364	-1	-1	1	0	6.74444e-08	-0.242374	8.05095e-10	-0.272892	1	0.0628031	0	0
DOCK2	1794	1.01635e-06	-0.149344	5.25132e-07	-0.160105	-1	-1	1	0	3.33067e-16	0.305012	3.33067e-16	0.335423	3.33067e-16	0.000910244	0.60303	0
ECHDC3	79746	0.00049037	-0.102761	0.00132953	-0.195409	0.0625281	-0.0567515	0.0127731	0.0161073	0.0581834	0.0438841	1.23901e-13	0.13675	0.603808	-0.00918226	2.25676e-05	2.25676e-05
ECM2	1842	1.24903e-13	-0.216106	1.93053e-07	-0.233623	2.432e-07	-0.213978	0.466873	0.62711	0.291927	0.0320227	0.00811287	0.126227	0.999961	-0.0331954	0.00115924	0.00115924
EEF1A2	1917	2.59696e-05	0.427408	0.000769817	0.589018	0.00797764	0.22381	0.0393588	0.0234271	0.053411	0.169669	0.0158833	0.257519	0.406751	0.0818182	0.00583387	0.00583387
EFEMP1	2202	7.9188e-12	-0.236166	1.01584e-12	-0.249719	0.0123854	-0.188406	0.300052	0.246017	2.77556e-15	0.173142	3.33067e-16	0.222817	3.33067e-16	0.00424496	1.74438e-05	1.74438e-05
EFEMP2	30008	2.09856e-10	-0.206628	1.96697e-11	-0.223122	-1	-1	1	0	2.02976e-08	0.187409	7.36213e-11	0.201701	3.33067e-16	0.0444886	0.474454	0.0208688
EIF4G3	8672	2.22553e-10	0.154967	0.000576258	0.24911	5.32819e-08	0.133804	0.00769373	0.0105684	0.193129	-0.0345996	0.00289739	-0.180198	4.08559e-131	0.00822349	1.55891e-05	1.55891e-05
ELMO3	79767	3.24983e-09	0.192276	5.49886e-07	0.232915	0.000885514	0.146596	0.103108	0.116456	0.0399261	-0.0767104	0.000134552	-0.135356	0.999504	-0.0063354	0.000307538	0.000307538
ENG	2022	7.88676e-06	-0.146738	1.88923e-05	-0.182825	0.0167499	-0.110353	0.200034	0.143208	0.0142601	0.0629711	4.44089e-15	0.120779	0.335968	0.00516265	0.00104941	0.00104941
EOMES	8320	0.106166	0.0472579	0.0248621	0.122108	0.833922	-0.00525476	0.00777023	0.00505607	1.09476e-07	0.0991384	3.33067e-16	0.259275	0.801631	-0.0117254	2.92366e-07	2.92366e-07
FAM107A	11170	1.16125e-22	-0.558743	2.20654e-21	-0.567377	-1	-1	1	0	8.69462e-05	0.160811	2.0077e-05	0.166952	3.33067e-16	0.0994023	0.685191	0.114097
FAP	2191	0.135409	0.0455657	0.0233545	0.132828	0.73877	0.0134621	0.0415372	0.0430067	0.565912	0.00127739	0.00106839	-0.131946	3.92122e-09	0.0512363	0.000349072	0.000349072
FCER1A	2205	5.49113e-11	-0.292652	4.16822e-08	-0.264616	4.93077e-05	-0.398348	0.0942595	0.108535	7.93916e-64	-0.249586	3.89879e-114	-0.323744	1	0.00255204	2.15127e-05	2.15127e-05
FLJ23235	80008	3.06098e-06	0.121518	3.06098e-06	0.121518	-1	-1	1	0	1.01346e-11	-0.277454	1.01346e-11	-0.277454	-1	-1	1	0
FSTL1	11167	0.00233919	-0.082108	0.000179959	-0.130051	0.442586	-0.0298268	0.0728615	0.0821216	0.0713922	0.0983222	0.0051349	0.138627	3.33067e-16	0.0277893	0.00220062	0.00220062
FZD1	8321	0.00016979	-0.0572459	9.83549e-05	-0.12093	0.0148421	-0.0433456	0.030905	0.0414013	0.100868	0.0291336	0.00827185	0.144513	0.988558	-0.00480142	8.76965e-12	8.76965e-12
GCNT3	9245	9.34246e-09	0.549802	1.72453e-07	0.646675	0.00357144	0.384855	0.00636049	0.00438267	4.43052e-05	-0.124432	4.65684e-42	-0.1934	1	-0.00373903	9.21494e-07	9.21494e-07
GJA4	2701	1.78647e-16	-0.259834	1.19373e-12	-0.278948	0.000259264	-0.207015	0.121127	0.159512	0.000288415	0.0864001	3.51177e-09	0.121771	3.33067e-16	-0.00792271	2.32239e-05	2.32239e-05
GNG5	2787	0.0319291	-0.0416167	0.00354369	-0.117188	0.147672	-0.0299096	0.0380266	0.0649316	0.127323	0.0208651	7.80745e-07	0.106261	0.985838	-0.00425145	1.80084e-06	1.80084e-06
GSTM3	2947	6.48123e-07	-0.214619	9.98436e-06	-0.318563	0.000713098	-0.165807	0.0260774	0.0259485	0.0299624	0.0652876	3.33067e-16	0.182931	0.65986	0.0103875	4.4441e-06	4.4441e-06
GUCY1B2	2974	1.70721e-05	0.12965	3.40516e-05	0.164913	0.108975	0.0456582	0.0102121	0.0069465	0.0128045	0.104425	0.000369715	0.135003	3.33067e-16	0.0228842	0.00168671	0.00168671
HAMP	57817	0.000112421	0.149803	0.00178419	0.125121	0.0115632	0.304369	0.719125	0.0475107	0.000101709	-0.181824	1.38603e-05	-0.198689	1	-0.0750169	0.0165921	0.0165921
HBA1	3039	1.1636e-10	-0.418795	2.67823e-06	-0.528689	1.08012e-06	-0.324921	0.00602961	0.00895218	6.21392e-13	0.103518	3.33067e-16	0.215841	0.548482	0.00991504	2.6857e-07	2.6857e-07
HBA2	3040	6.60747e-12	-0.448319	2.85162e-08	-0.524352	1.22753e-05	-0.355113	0.0258218	0.0358602	5.9952e-15	0.0971338	3.33067e-16	0.170992	0.194993	0.00850413	0.000224816	0.000224816
HKDC1	80201	5.57313e-07	0.228236	3.81882e-08	0.259729	0.933983	-0.00137153	2.67968e-05	2.21823e-13	1.82795e-06	-0.179648	1.14989e-08	-0.206754	1	0.0914144	0.144169	1.66243e-11
HLA-DOB	3112	0.0938372	0.0613924	0.0199126	0.118461	0.859493	0.00836981	0.118854	0.0981936	0.0467337	-0.066915	4.12416e-08	-0.133873	9.47271e-13	-0.0111167	3.06753e-08	3.06753e-08
HOXC8	3224	0.000179836	0.136055	0.000170772	0.184648	0.370195	0.031434	0.0220059	0.0186848	3.33067e-16	0.160751	3.33067e-16	0.256168	0.100732	-0.00622962	0.00214025	0.00214025
HSPB3	8988	9.58017e-09	-0.163004	0.00856377	-0.157554	1.26786e-08	-0.181075	0.839205	0.587102	0.293563	0.0416321	0.00268116	0.155232	0.992846	-0.011381	0.000113727	0.000113727
HSPB6	126393	1.67152e-13	-0.268947	2.53232e-11	-0.289973	0.00687563	-0.202612	0.216346	0.190181	0.000162222	0.137554	1.76959e-09	0.190942	3.33067e-16	-0.00481573	4.36369e-06	4.36369e-06
HSPB8	26353	4.55918e-11	-0.252546	8.8561e-07	-0.314672	9.15559e-07	-0.213975	0.0607542	0.0587509	0.0688517	0.100551	0.000663	0.169074	0.999897	0.0613945	0.00553077	0.00553077
INT1	26173	0.00240884	0.0826966	0.00236654	0.103814	0.37241	0.0332358	0.185109	0.155537	1.59602e-07	-0.152821	2.4414e-14	-0.204217	1	-0.0157647	1.90432e-05	1.90432e-05
IRS2	8660	0.000172712	-0.109495	0.000298665	-0.212358	0.0338233	-0.0722059	0.00445369	0.00895687	0.211497	0.0428661	0.00193395	0.156677	0.7832	-0.0102457	1.60238e-07	1.60238e-07
ITGAM	3684	0.00590416	-0.0845972	0.000184274	-0.201656	0.319229	-0.0337866	0.0015121	0.00662563	0.183916	0.0564701	0.00810286	0.126962	0.999999	0.00766819	0.00105078	0.00105078
KRTCAP3	200634	0.00306662	0.106921	0.000124534	0.196471	0.485067	0.0340441	0.00195124	0.00223053	0.0591505	-0.075218	0.000592753	-0.132343	0.00838594	-0.027614	0.000106097	0.000106097
LAPTM5	7805	0.000244323	-0.104225	0.00132678	-0.17486	0.0173997	-0.0810595	0.0634372	0.0847213	0.27753	0.0356871	0.00647042	0.11518	1	-0.00140949	0.00690902	0.00690902
LGALS4	3960	0.0316011	0.193005	0.0110762	0.296683	0.202001	-0.0900902	0.0237714	0.0211308	1.58166e-06	-0.116567	2.95795e-19	-0.188698	1	0.0757846	1.49073e-06	1.49073e-06
LONRF1	91694	0.000109935	-0.0836487	0.00585175	-0.113378	0.00955976	-0.0642569	0.174363	0.171596	0.153095	-0.0539187	0.0126572	-0.1221	1.38352e-18	-0.00671625	0.00125684	0.00125684
LST1	7940	7.07839e-08	-0.145571	3.44174e-08	-0.149177	-1	-1	1	0	6.96653e-05	-0.172973	2.36916e-05	-0.183804	1	0.0544729	0.731672	0.0005
MAL	4118	6.25872e-10	-0.281713	6.25872e-10	-0.281713	-1	-1	1	0	3.33067e-16	0.259505	3.33067e-16	0.259505	-1	-1	1	0
MAMDC2	256691	2.42504e-12	-0.358463	8.77419e-12	-0.381445	0.00385275	-0.213948	0.0116376	0.00797031	2.58812e-08	0.212452	3.0842e-13	0.247968	3.33067e-16	-0.0124784	0.000402411	0.000402411
MMP9	4318	9.9872e-07	0.366073	0.000357684	0.503919	0.000285049	0.30136	0.105582	0.104596	0.400781	0.0174859	0.0258926	0.147707	1	-0.0432839	0.00226427	0.00226427
MSR1	4481	8.66567e-11	-0.135114	1.4771e-07	-0.112975	0.000415411	-0.187032	0.0427779	0.059857	5.4456e-12	-0.135324	2.25322e-26	-0.193892	1	0.0208577	2.97411e-09	2.97411e-09
MX2	4600	1.32105e-05	0.200464	3.35125e-09	0.253661	0.404207	-0.0830628	6.99107e-05	0.00172541	5.40156e-05	-0.210766	2.52503e-08	-0.271517	1	0.0626121	5.96927e-08	5.96927e-08
MYADM	91663	6.48683e-13	-0.156743	6.26514e-05	-0.189855	2.10517e-09	-0.151361	0.0682675	0.150116	0.0651104	0.119617	4.34269e-05	0.295137	0.990006	0.0377076	3.2839e-06	3.2839e-06
NBL1	4681	4.37775e-06	-0.139034	2.02226e-05	-0.181881	0.00345826	-0.119393	0.0975436	0.180106	0.0438344	0.0878463	4.12229e-07	0.19879	0.846472	0.0110391	0.000188343	0.000188343
NKD2	85409	6.58801e-07	-0.137264	0.00161789	-0.168974	6.23696e-06	-0.132599	0.373711	0.441555	0.0319097	0.0723146	3.33067e-16	0.299199	0.618365	0.00558376	0.000104298	0.000104298
NNMT	4837	0.000110695	-0.123781	0.000348914	-0.181422	0.0614241	-0.0767521	0.0743131	0.135593	0.0301765	0.108427	1.51789e-06	0.212541	0.448279	0.00431273	1.57181e-07	1.57181e-07
OBSCN	84033	0.00415181	0.0603944	0.000174526	0.141404	0.270316	0.025674	3.87936e-05	0.00134738	0.236406	-0.0352811	0.00307308	-0.108823	2.1647e-23	0.00674257	0.000735117	0.000735117
PAQR7	164091	3.17834e-05	0.127301	3.36273e-05	0.184136	0.0623944	0.0730927	0.0388754	0.0442434	0.0380641	-0.0733158	7.68256e-06	-0.139362	0.440097	-0.00726986	0.000684106	0.000684106
PARP12	64761	0.000337444	0.0922387	1.0111e-05	0.135535	0.264024	0.0434755	0.0307142	0.0345907	1.59043e-13	-0.103622	1.80204e-57	-0.189583	1	-0.000468042	4.45853e-05	4.45853e-05
PARVA	55742	0.00177632	-0.0613649	0.00180524	-0.102673	0.0298848	-0.0521878	0.127628	0.245048	0.186034	0.0457228	0.000440464	0.142609	0.890538	0.000508998	5.29902e-05	5.29902e-05
PCDH12	51294	1.2394e-05	-0.082046	2.3809e-05	-0.105008	0.0756247	-0.0443057	0.0548273	0.0429842	0.027096	0.105576	2.18656e-05	0.16193	3.33067e-16	-0.0151823	9.50329e-08	9.50329e-08
PGC	5225	2.28956e-06	-0.373787	0.00234345	-0.229496	8.89373e-06	-0.665846	0.00379512	0.00514659	9.5324e-06	-0.147282	2.44405e-14	-0.221101	1	0.0109016	2.51237e-05	2.51237e-05
PLA2G12B	84647	0.156781	0.0564161	0.00270813	0.183069	0.0305099	-0.0703401	9.09646e-10	2.01658e-10	0.00238795	-0.0847597	5.69506e-21	-0.195763	0.480802	0.0262434	0	0
PLA2G4C	8605	3.56102e-05	-0.135776	0.00685218	-0.159677	0.000651076	-0.123188	0.417424	0.412731	0.0831321	-0.0824028	0.00295857	-0.175054	1.74796e-07	-0.0294593	0.00107179	0.00107179
PLAT	5327	0.841157	-0.00798547	0.0267499	-0.161635	0.542375	0.0616776	0.0720307	0.0940424	0.222345	0.0519675	0.000200216	0.1741	0.999998	-0.0178228	0.000566484	0.000566484
PODN	127435	0.00814743	-0.093973	0.0102113	-0.118571	0.374678	-0.0447916	0.25273	0.269145	6.66134e-16	0.157901	3.33067e-16	0.248968	0.0122759	-0.00146621	2.54868e-06	2.54868e-06
PPP1R14D	54866	0.00103427	0.124148	0.00492536	0.165409	0.0597405	0.0686816	0.119302	0.132601	2.66917e-07	-0.121105	7.00162e-30	-0.216918	1	-0.00612912	1.88535e-09	1.88535e-09
PPP1R3C	5507	1.22174e-06	-0.182598	0.000889513	-0.298409	0.000237551	-0.158317	0.0738185	0.0987166	0.0609373	0.0434606	3.33067e-16	0.188858	0.97676	0.000696586	4.71391e-05	4.71391e-05
PRKCDBP	112464	9.50006e-08	-0.213924	7.22499e-08	-0.323512	0.00132729	-0.138897	1.405e-08	1.5527e-05	3.33067e-16	0.113051	3.33067e-16	0.255353	0.740164	-0.00553367	1.15241e-05	1.15241e-05
PROM2	150696	1.7112e-11	0.365458	1.7112e-11	0.365458	-1	-1	1	0	4.75722e-18	-0.208091	4.75722e-18	-0.208091	-1	-1	1	0
PTGES	9536	1.19903e-07	0.173148	0.000209482	0.133223	6.75831e-05	0.203125	0.125619	0.145494	0.100726	-0.0614267	0.000273891	-0.145016	0.0481066	0.00823143	1.58087e-06	1.58087e-06
PTPLA	9200	5.38152e-09	-0.220778	3.37018e-08	-0.322343	0.000342045	-0.170576	0.00382891	0.00517733	0.0462275	0.0385887	3.33067e-16	0.116207	0.947178	-0.00576458	9.74428e-06	9.74428e-06
PTPRH	5794	0.000673273	0.116419	0.000811886	0.147225	0.252709	0.0253824	0.0407936	0.0632224	6.00168e-10	-0.147517	1.93393e-18	-0.203673	1	0.00223462	7.12984e-05	7.12984e-05
PTPRM	5797	3.46406e-16	-0.244444	5.72648e-08	-0.278282	5.67547e-08	-0.215692	0.0473736	0.0620432	0.0207721	0.0514845	8.03358e-08	0.1092	0.497751	-0.00623092	0.000179629	0.000179629
RAB5A	5868	0.0261185	-0.0582023	0.00624536	-0.123135	0.36975	-0.0289907	0.01363	0.0201433	0.0671552	0.0452592	0.031233	0.123348	0.933491	0.00881787	1.144e-05	1.144e-05
RAD23B	5887	0.0395321	-0.0440343	0.0072075	-0.100413	0.45761	-0.0193491	0.0410718	0.0421022	0.0824606	0.0460223	1.02909e-08	0.15198	0.901119	-0.00342465	0	0
RPL22	6146	2.78503e-06	-0.110652	0.000132338	-0.182221	0.000773176	-0.0942662	0.0155214	0.0214552	0.190171	0.0172198	0.0123948	0.115441	0.99947	-0.0116687	2.92327e-08	2.92327e-08
S100A16	140576	0.0207598	0.0819572	0.00114071	0.127863	0.00897407	-0.0965627	0.0102986	0.00834341	0.000343518	-0.17871	1.92083e-07	-0.231263	1	-2.86168e-05	1.80717e-05	1.80717e-05
S100A4	6275	8.58043e-08	-0.250322	6.722e-07	-0.380635	1.97023e-05	-0.238424	0.0679558	0.159082	0.0682573	0.0819302	0.000105989	0.199626	1	0.0377943	0.0132897	0.0132897
S100P	6286	0.0109786	0.22179	0.00370845	0.366165	0.454163	0.0754183	0.0508907	0.0397286	0.0175809	-0.0676507	2.54954e-14	-0.170885	4.99466e-07	0.0183777	5.18949e-11	5.18949e-11
SEMA3F	6405	0.0571096	-0.0439589	0.00060969	-0.105171	0.545038	0.0319212	0.00437916	0.00587808	0.000151924	0.135557	3.33067e-16	0.237421	0.229694	-0.0115803	1.64602e-05	1.64602e-05
SERPINA3	12	0.0010254	-0.186437	0.00112205	-0.358476	0.0112095	-0.160428	0.0948933	0.140305	0.346888	-0.0278176	0.000168449	-0.213553	6.34342e-09	0.0268105	0.000339204	0.000339204
SFN	2810	4.02728e-12	0.380013	4.02728e-12	0.380013	-1	-1	1	0	1.6607e-12	-0.249272	1.6607e-12	-0.249272	-1	-1	1	0
SH3GL2	6456	3.49271e-11	-0.163864	0.00115894	-0.255293	2.41016e-08	-0.145556	0.0168757	0.0305674	0.0272729	0.0761176	3.33067e-16	0.313095	0.963311	0.00641833	1.46438e-13	1.46438e-13
SLC22A18AS	5003	3.13531e-07	0.249679	1.70385e-05	0.323435	0.00234209	0.190262	0.0321157	0.0348723	0.0809218	-0.105521	0.00271165	-0.203695	0.0347706	-0.023709	2.10315e-07	2.10315e-07
SMAD7	4092	0.00123238	-0.0741451	0.00220834	-0.146355	0.036917	-0.0570964	0.0467704	0.0579254	0.137196	0.0417611	5.17395e-11	0.168783	0.996171	0.00440167	3.7312e-07	3.7312e-07
SOX17	64321	4.83138e-12	-0.224094	4.83138e-12	-0.224094	-1	-1	1	0	4.44089e-15	0.377692	4.44089e-15	0.377692	-1	-1	1	0
SPARC	6678	8.26955e-11	-0.202664	3.26758e-12	-0.244293	0.00939503	-0.128832	8.41819e-05	0.0432556	3.33067e-16	0.132026	3.33067e-16	0.16871	3.33067e-16	0.0342039	0.00414942	0.00414942
SPARCL1	8404	2.11348e-14	-0.324913	1.93461e-13	-0.335175	-1	-1	1	0	4.02367e-12	0.280064	5.9952e-15	0.306546	3.33067e-16	0.0152447	0.222313	0.0005
SPINK1	6690	1.93543e-05	0.506658	0.000478977	0.754361	0.00383231	0.376104	0.0399234	0.0392529	0.0618498	-0.0394287	1.28699e-11	-0.131263	5.35084e-144	0.0130481	5.63489e-08	5.63489e-08
SPRY2	10253	0.131567	-0.0330938	0.00955887	-0.124277	0.510056	-0.0158486	0.0212305	0.0375258	0.179734	0.0381992	0.00269725	0.145094	0.914149	0.0067596	1.36464e-05	1.36464e-05
ST6GALNAC5	81849	2.37493e-11	-0.136818	2.41477e-05	-0.169088	1.72922e-05	-0.118073	0.0422108	0.0624052	8.89129e-06	0.0546396	3.33067e-16	0.138271	0.865293	-0.00325935	9.44464e-09	9.44464e-09
STK6	6790	3.22114e-08	0.225486	0.0127453	0.147991	1.99634e-06	0.250631	0.0938734	0.116573	0.352215	-0.0108477	6.03025e-06	-0.112518	2.67149e-08	0.0365984	0.00642726	0.00642726
TCF21	6943	5.13148e-22	-0.402309	5.13148e-22	-0.402309	-1	-1	1	0	3.33067e-16	0.199396	3.33067e-16	0.199396	-1	-1	1	0
TDP1	55775	5.91159e-07	0.137914	0.000205789	0.121234	1.03268e-05	0.15728	0.541547	0.341133	3.59767e-05	0.0436946	3.33067e-16	0.14719	0.955733	-0.00460309	3.58176e-05	3.58176e-05
TGM2	7052	5.24578e-06	-0.098629	1.85201e-09	-0.188231	0.118123	-0.0385934	2.17975e-09	5.37727e-07	0.0320402	0.0770065	1.10089e-07	0.183015	0.886651	-0.0113343	5.49771e-08	5.49771e-08
TM4SF18	116441	0.000110018	-0.155696	7.87046e-05	-0.211431	0.00320221	-0.147263	0.131565	0.237462	0.350977	0.0306884	9.61859e-05	0.172015	1	-0.0352637	0.000235126	0.000235126
TMC6	11322	1.54071e-11	0.148041	1.54071e-11	0.148041	-1	-1	1	0	1.01947e-13	-0.302579	1.01947e-13	-0.302579	-1	-1	1	0
TMEM55A	55529	6.21286e-07	-0.0999962	0.0001933	-0.137563	0.000440946	-0.087122	0.0671696	0.107097	0.025413	0.0439317	1.62159e-12	0.123978	0.971371	-0.0018091	4.52377e-05	4.52377e-05
TNFRSF1B	7133	0.000321363	-0.0892658	0.000804738	-0.108068	0.0816683	-0.0604969	0.255878	0.261798	3.33067e-16	0.169792	3.33067e-16	0.28195	0.0841925	0.00778696	0.000817512	0.000817512
TNFSF13B	10673	0.00919796	-0.0611349	0.00144898	-0.10542	0.821926	-0.00552483	0.0261883	0.0427639	0.0499842	-0.084823	4.82486e-05	-0.157721	1	0.0204737	7.9988e-06	7.9988e-06
TNKS1BP1	85456	4.07825e-06	0.114251	1.88854e-05	0.164612	0.0293219	0.0664886	0.0331268	0.0322583	0.0127066	-0.114766	9.08752e-07	-0.197428	0.422154	-0.0321035	2.45148e-12	2.45148e-12
TPM2	7169	1.25315e-05	-0.0850324	0.00582099	-0.103538	0.000156214	-0.0819995	0.41058	0.51866	0.159157	0.0486659	0.0300939	0.1313	1	0.0101033	0.000555812	0.000555812
TRPC6	7225	0.0231543	-0.0775532	2.67371e-05	-0.143258	0.864811	0.0105578	0.0322087	0.0192646	3.38681e-06	0.0682744	3.33067e-16	0.133771	0.434061	0.0027776	4.23913e-08	4.23913e-08
UBD	10537	0.00539844	0.151378	0.00436914	0.265388	0.0555303	0.0835919	0.00410823	0.00287049	0.120413	-0.0661423	1.55783e-10	-0.216048	1.18956e-21	0.0195182	0.000978042	0.000978042
WFDC1	58189	1.48841e-10	-0.223972	0.000147447	-0.172112	3.75733e-09	-0.271646	0.0891574	0.0494304	0.120382	-0.085187	0.0002863	-0.214799	0.00402181	0.00454424	4.30193e-07	4.30193e-07
WFDC3	140686	0.000106663	0.163138	0.000166454	0.222946	0.130158	0.0648772	0.0179307	0.0202251	0.00748753	-0.127452	4.85025e-09	-0.2172	1	0.0296055	5.70249e-06	5.70249e-06
XDH	7498	5.5707e-07	0.137659	1.97832e-07	0.145133	-1	-1	1	0	3.43337e-147	-0.321612	3.60711e-165	-0.339491	1	0.0538412	0.677851	0.001
ZAK	51776	1.56416e-08	-0.134077	4.15081e-06	-0.157219	0.000101402	-0.122719	0.340525	0.330065	0.0377992	0.0602848	4.30869e-11	0.161211	0.984909	0.00261237	1.55059e-08	1.55059e-08
* Set p=-1 if number of samples in T-NDM<5
Genes ranked by dictionary order

## Sheet: Responsive module
DM-responsive modules for top30 ranked genes (δ=1.96)											DM-responsive modules for top30 ranked genes (δ=4.46)
seed gene symbol	Entrez ID	Node1	EntrezID	Node2	EntrezID	CLR score(T-DM)	CLR score (NTL)	CLR score (T-NDM)			seed gene symbol	Entrez ID	Node1	EntrezID	Node2	EntrezID	CLR score(T-DM)	CLR score (NTL)	CLR score (T-NDM)
AGR2	10551	HMGCS2	3158	ITLN1	55600	27.7167	0	0			AGR2	10551	SPAG6	9576	EFCAB1	79645	28.652	17.7969	0
AGR2	10551	CA4	762	ITLN2	142683	25.1808	3.5327	0			AGR2	10551	HMGCS2	3158	ITLN1	55600	27.7167	0	0
AGR2	10551	APOL1	8542	APOL2	23780	22.6268	0	0			AGR2	10551	CA4	762	ITLN2	142683	25.1808	3.5327	0
AGR2	10551	ALB	213	PCDHA3	56145	22.5731	3.76384	0			AGR2	10551	APOL1	8542	APOL2	23780	22.6268	0	0
AGR2	10551	CA4	762	C9orf26	90865	19.551	0	0			AGR2	10551	ALB	213	PCDHA3	56145	22.5731	3.76384	0
AGR2	10551	UPB1	51733	EFCAB1	79645	18.767	0.85733	0			AGR2	10551	CA4	762	C9orf26	90865	19.551	0	0
AGR2	10551	VIP	7432	KIF12	113220	18.2564	0	0			AGR2	10551	UPB1	51733	EFCAB1	79645	18.767	0.85733	0
AGR2	10551	SPAG6	9576	ITLN1	55600	18.0079	0	0			AGR2	10551	VIP	7432	KIF12	113220	18.2564	0	0
AGR2	10551	PSMD2	5708	RBM25	58517	17.7643	3.50138	0			AGR2	10551	SPAG6	9576	ITLN1	55600	18.0079	0	0
AGR2	10551	DLL4	54567	THSD1	55901	17.105	3.42428	0			AGR2	10551	PSMD2	5708	RBM25	58517	17.7643	3.50138	0
AGR2	10551	FCN3	8547	FAM107A	11170	16.7098	0.328115	0			AGR2	10551	DLL4	54567	THSD1	55901	17.105	3.42428	0
AGR2	10551	MRPS31	10240	EXOSC8	11340	16.1955	0	0			AGR2	10551	FCN3	8547	FAM107A	11170	16.7098	0.328115	0
AGR2	10551	FOXA3	3171	NME5	8382	15.7758	0	0			AGR2	10551	MRPS31	10240	EXOSC8	11340	16.1955	0	0
AGR2	10551	NME5	8382	MGC13040	85016	15.5819	12.0068	0			AGR2	10551	FOXA3	3171	NME5	8382	15.7758	0	0
AGR2	10551	TEK	7010	C9orf26	90865	15.1302	6.09447	0			AGR2	10551	NME5	8382	MGC13040	85016	15.5819	12.0068	0
AGR2	10551	WDR78	79819	MGC13040	85016	15.1009	12.4154	0			AGR2	10551	TEK	7010	C9orf26	90865	15.1302	6.09447	0
AGR2	10551	ERN2	10595	DOCK5	80005	15.0585	1.82676	0			AGR2	10551	WDR78	79819	MGC13040	85016	15.1009	12.4154	0
AGR2	10551	PRRG2	5639	TTTY9B	425057	14.9561	1.31296	0			AGR2	10551	ERN2	10595	DOCK5	80005	15.0585	1.82676	0
AGR2	10551	AGR2	10551	ERN2	10595	14.9069	0	0			AGR2	10551	PRRG2	5639	TTTY9B	425057	14.9561	1.31296	0
AGR2	10551	CA4	762	PTPRB	5787	14.6569	0	0			AGR2	10551	AGR2	10551	ERN2	10595	14.9069	0	0
AGR2	10551	CAPS	828	ARMC4	55130	14.285	5.8466	0			AGR2	10551	CA4	762	PTPRB	5787	14.6569	0	0
AGR2	10551	MBNL1	4154	ARMC4	55130	14.1408	0	0			AGR2	10551	CAPS	828	ARMC4	55130	14.285	5.8466	0
AGR2	10551	C9orf26	90865	ITLN2	142683	14.06	0	0			AGR2	10551	MBNL1	4154	ARMC4	55130	14.1408	0	0
AGR2	10551	ARMC4	55130	EFCAB1	79645	14.0403	7.71736	0			AGR2	10551	C9orf26	90865	ITLN2	142683	14.06	0	0
AGR2	10551	UPB1	51733	ARMC4	55130	14.0298	0	0			AGR2	10551	ARMC4	55130	EFCAB1	79645	14.0403	7.71736	0
AGR2	10551	PTPRN2	5799	ITLN2	142683	13.9417	1.34799	0			AGR2	10551	UPB1	51733	ARMC4	55130	14.0298	0	0
AGR2	10551	MRPS18B	28973	TBC1D24	57465	13.9138	0	0			AGR2	10551	PTPRN2	5799	ITLN2	142683	13.9417	1.34799	0
AGR2	10551	NME5	8382	WDR78	79819	13.7763	10.6188	0			AGR2	10551	MRPS18B	28973	TBC1D24	57465	13.9138	0	0
AGR2	10551	PTPRB	5787	C9orf26	90865	13.7119	0.390046	0			AGR2	10551	NME5	8382	WDR78	79819	13.7763	10.6188	0
AGR2	10551	EFEMP1	2202	PCDHA3	56145	13.6606	3.23081	0			AGR2	10551	PTPRB	5787	C9orf26	90865	13.7119	0.390046	0
AGR2	10551	BCHE	590	SNRK	54861	13.6381	0.963162	0			AGR2	10551	EFEMP1	2202	PCDHA3	56145	13.6606	3.23081	0
AGR2	10551	TBX3	6926	EFCAB1	79645	13.321	0	0			AGR2	10551	BCHE	590	SNRK	54861	13.6381	0.963162	0
AGR2	10551	AGR2	10551	EFCAB1	79645	13.3009	0	0			AGR2	10551	TBX3	6926	EFCAB1	79645	13.321	0	0
AGR2	10551	FOXA3	3171	UGT2B10	7365	13.1951	0	0			AGR2	10551	AGR2	10551	EFCAB1	79645	13.3009	0	0
AGR2	10551	BCHE	590	KCNK3	3777	13.0946	0	0			AGR2	10551	FOXA3	3171	UGT2B10	7365	13.1951	0	0
AGR2	10551	STUB1	10273	RNPS1	10921	12.773	0	0			AGR2	10551	BCHE	590	KCNK3	3777	13.0946	0	0
AGR2	10551	PRRG2	5639	AGR2	10551	12.7479	0.69874	0			AGR2	10551	STUB1	10273	RNPS1	10921	12.773	0	0
AGR2	10551	FAM107A	11170	C9orf26	90865	12.556	0	0			AGR2	10551	PRRG2	5639	AGR2	10551	12.7479	0.69874	0
AGR2	10551	ARMC4	55130	C15orf26	161502	12.5543	7.61101	0			AGR2	10551	FAM107A	11170	C9orf26	90865	12.556	0	0
AGR2	10551	SPAG6	9576	UPB1	51733	12.5197	0.117595	0			AGR2	10551	ARMC4	55130	C15orf26	161502	12.5543	7.61101	0
AGR2	10551	RBM25	58517	MGC11266	79172	12.4577	0	0			AGR2	10551	SPAG6	9576	UPB1	51733	12.5197	0.117595	0
AGR2	10551	CAPS	828	C15orf26	161502	12.4489	11.4085	0			AGR2	10551	RBM25	58517	MGC11266	79172	12.4577	0	0
AGR2	10551	CAPS	828	SMOX	54498	12.2659	0.370416	0			AGR2	10551	CAPS	828	C15orf26	161502	12.4489	11.4085	0
AGR2	10551	SHANK2	22941	SPTY2D1	144108	12.2373	0	0			AGR2	10551	CAPS	828	SMOX	54498	12.2659	0.370416	0
AGR2	10551	FOXA3	3171	PRRG1	5638	12.2216	0.0247688	0			AGR2	10551	SHANK2	22941	SPTY2D1	144108	12.2373	0	0
AGR2	10551	SLPI	6590	MANEAL	149175	12.1644	0	0			AGR2	10551	FOXA3	3171	PRRG1	5638	12.2216	0.0247688	0
AGR2	10551	GNAT1	2779	SNRPA	6626	12.1458	2.41012	0			AGR2	10551	SLPI	6590	MANEAL	149175	12.1644	0	0
AGR2	10551	NME5	8382	AGR2	10551	12.145	0	0			AGR2	10551	GNAT1	2779	SNRPA	6626	12.1458	2.41012	0
AGR2	10551	PDE5A	8654	WFDC1	58189	12.1317	0	0			AGR2	10551	NME5	8382	AGR2	10551	12.145	0	0
AGR2	10551	PSMD11	5717	CCL25	6370	12.0854	0	0			AGR2	10551	PDE5A	8654	WFDC1	58189	12.1317	0	0
AGR2	10551	PTPRN2	5799	NME5	8382	12.0813	0	0			AGR2	10551	PSMD11	5717	CCL25	6370	12.0854	0	0
AGR2	10551	WNT11	7481	PDE5A	8654	12.0799	0.0226772	0			AGR2	10551	PTPRN2	5799	NME5	8382	12.0813	0	0
AGR2	10551	HIST1H1B	3009	ATAD2	29028	12.062	1.28512	0			AGR2	10551	WNT11	7481	PDE5A	8654	12.0799	0.0226772	0
AGR2	10551	SMOX	54498	DOCK5	80005	11.9542	0	0			AGR2	10551	HIST1H1B	3009	ATAD2	29028	12.062	1.28512	0
AGR2	10551	SLPI	6590	AGR2	10551	11.874	1.69293	0			AGR2	10551	SMOX	54498	DOCK5	80005	11.9542	0	0
AGR2	10551	SRM	6723	ZDHHC3	51304	11.836	0	0			AGR2	10551	SLPI	6590	AGR2	10551	11.874	1.69293	0
AGR2	10551	EFCAB1	79645	C15orf26	161502	11.8157	10.4929	0			AGR2	10551	SRM	6723	ZDHHC3	51304	11.836	0	0
AGR2	10551	UGT2B10	7365	NME5	8382	11.7643	0.428241	0			AGR2	10551	EFCAB1	79645	C15orf26	161502	11.8157	10.4929	0
AGR2	10551	FAM107A	11170	SNRK	54861	11.7501	0	0			AGR2	10551	UGT2B10	7365	NME5	8382	11.7643	0.428241	0
AGR2	10551	PTPRB	5787	TEK	7010	11.6785	5.17971	0			AGR2	10551	FAM107A	11170	SNRK	54861	11.7501	0	0
AGR2	10551	KCNK3	3777	FCN3	8547	11.6644	0	0			AGR2	10551	PTPRB	5787	TEK	7010	11.6785	5.17971	0
AGR2	10551	AGR2	10551	ATAD2	29028	11.6336	0	0			AGR2	10551	KCNK3	3777	FCN3	8547	11.6644	0	0
AGR2	10551	FAM83E	54854	DOCK5	80005	11.622	0.704645	0			AGR2	10551	AGR2	10551	ATAD2	29028	11.6336	0	0
AGR2	10551	PTPRN2	5799	C9orf26	90865	11.6116	0	0			AGR2	10551	FAM83E	54854	DOCK5	80005	11.622	0.704645	0
AGR2	10551	CA4	762	RPGR	6103	11.5803	0.880388	0			AGR2	10551	PTPRN2	5799	C9orf26	90865	11.6116	0	0
AGR2	10551	BCHE	590	TEK	7010	11.5046	0.431319	0			AGR2	10551	CA4	762	RPGR	6103	11.5803	0.880388	0
AGR2	10551	CAPS	828	EFCAB1	79645	11.4939	10.7413	0			AGR2	10551	BCHE	590	TEK	7010	11.5046	0.431319	0
AGR2	10551	EXOSC8	11340	RAPGEF6	51735	11.4787	1.06879	0			AGR2	10551	CAPS	828	EFCAB1	79645	11.4939	10.7413	0
AGR2	10551	HLA-DRB4	3126	CCL25	6370	11.4589	0.679909	0			AGR2	10551	EXOSC8	11340	RAPGEF6	51735	11.4787	1.06879	0
AGR2	10551	CCL25	6370	DYNC2H1	79659	11.4589	0	0			AGR2	10551	HLA-DRB4	3126	CCL25	6370	11.4589	0.679909	0
AGR2	10551	MRPS31	10240	RAPGEF6	51735	11.4523	0.0514778	0			AGR2	10551	CCL25	6370	DYNC2H1	79659	11.4589	0	0
AGR2	10551	ATAD2	29028	XKRX	402415	11.4518	0	0			AGR2	10551	MRPS31	10240	RAPGEF6	51735	11.4523	0.0514778	0
AGR2	10551	PTPRN2	5799	SNRK	54861	11.4301	0	0			AGR2	10551	ATAD2	29028	XKRX	402415	11.4518	0	0
AGR2	10551	RNPS1	10921	STARD7	56910	11.4253	0	0			AGR2	10551	PTPRN2	5799	SNRK	54861	11.4301	0	0
AGR2	10551	NME5	8382	PCDHAC1	56135	11.4091	0	0			AGR2	10551	RNPS1	10921	STARD7	56910	11.4253	0	0
AGR2	10551	PTPRB	5787	ERN2	10595	11.4074	0	0			AGR2	10551	NME5	8382	PCDHAC1	56135	11.4091	0	0
AGR2	10551	BCHE	590	C9orf26	90865	11.3696	1.29227	0			AGR2	10551	PTPRB	5787	ERN2	10595	11.4074	0	0
AGR2	10551	AGR2	10551	TTTY9B	425057	11.331	0.218814	0			AGR2	10551	BCHE	590	C9orf26	90865	11.3696	1.29227	0
AGR2	10551	ITLN1	55600	EFCAB1	79645	11.1903	0.0748096	0			AGR2	10551	AGR2	10551	TTTY9B	425057	11.331	0.218814	0
AGR2	10551	MUC5AC	4586	PRRG1	5638	11.1877	0	0			AGR2	10551	ITLN1	55600	EFCAB1	79645	11.1903	0.0748096	0
AGR2	10551	HPD	3242	POLB	5423	11.1532	0	0			AGR2	10551	MUC5AC	4586	PRRG1	5638	11.1877	0	0
AGR2	10551	UGT2B10	7365	APOL1	8542	11.1288	0	0			AGR2	10551	HPD	3242	POLB	5423	11.1532	0	0
AGR2	10551	BCHE	590	PDE5A	8654	11.1227	0.0147949	0			AGR2	10551	UGT2B10	7365	APOL1	8542	11.1288	0	0
AGR2	10551	RPGR	6103	RAVER2	55225	11.1031	0.936789	0			AGR2	10551	BCHE	590	PDE5A	8654	11.1227	0.0147949	0
AGR2	10551	KCNK3	3777	VIP	7432	11.098	1.08843	0			AGR2	10551	RPGR	6103	RAVER2	55225	11.1031	0.936789	0
AGR2	10551	HIST1H1B	3009	THSD1	55901	11.0953	0.718164	0			AGR2	10551	KCNK3	3777	VIP	7432	11.098	1.08843	0
AGR2	10551	BCHE	590	FCN3	8547	11.0648	0	0			AGR2	10551	HIST1H1B	3009	THSD1	55901	11.0953	0.718164	0
AGR2	10551	WNT11	7481	XKRX	402415	11.0101	0	0			AGR2	10551	BCHE	590	FCN3	8547	11.0648	0	0
AGR2	10551	PDE5A	8654	ATAD2	29028	11.0031	0.408243	0			AGR2	10551	WNT11	7481	XKRX	402415	11.0101	0	0
AGR2	10551	WNT11	7481	WFDC1	58189	10.9787	0	0			AGR2	10551	PDE5A	8654	ATAD2	29028	11.0031	0.408243	0
AGR2	10551	KLHL4	56062	MANEAL	149175	10.9755	0.915561	0			AGR2	10551	WNT11	7481	WFDC1	58189	10.9787	0	0
AGR2	10551	CA4	762	PTPRN2	5799	10.9241	0.653257	0			AGR2	10551	KLHL4	56062	MANEAL	149175	10.9755	0.915561	0
AGR2	10551	FOXA3	3171	MUC5AC	4586	10.9213	0	0			AGR2	10551	CA4	762	PTPRN2	5799	10.9241	0.653257	0
AGR2	10551	MUC5AC	4586	DOCK5	80005	10.8642	0	0			AGR2	10551	FOXA3	3171	MUC5AC	4586	10.9213	0	0
AGR2	10551	SMOX	54498	C15orf26	161502	10.8386	0.606977	0			AGR2	10551	MUC5AC	4586	DOCK5	80005	10.8642	0	0
AGR2	10551	RCC1	1104	PSMD11	5717	10.8258	0	0			AGR2	10551	SMOX	54498	C15orf26	161502	10.8386	0.606977	0
AGR2	10551	TEK	7010	FAM107A	11170	10.7962	0.441419	0			AGR2	10551	RCC1	1104	PSMD11	5717	10.8258	0	0
AGR2	10551	DFFA	1676	TMOD3	29766	10.7888	0	0			AGR2	10551	TEK	7010	FAM107A	11170	10.7962	0.441419	0
AGR2	10551	IER3	8870	MGC13040	85016	10.7623	0	0			AGR2	10551	DFFA	1676	TMOD3	29766	10.7888	0	0
AGR2	10551	ID1	3397	UPB1	51733	10.7166	0	0			AGR2	10551	IER3	8870	MGC13040	85016	10.7623	0	0
AGR2	10551	P2RY4	5030	TRAFD1	10906	10.6979	0	0			AGR2	10551	ID1	3397	UPB1	51733	10.7166	0	0
AGR2	10551	MCC	4163	SLPI	6590	10.681	4.45841	0			AGR2	10551	P2RY4	5030	TRAFD1	10906	10.6979	0	0
AGR2	10551	CASP10	843	LRRC18	474354	10.6362	0	0			AGR2	10551	MCC	4163	SLPI	6590	10.681	4.45841	0
AGR2	10551	CCL25	6370	XKRX	402415	10.6084	0.673329	0			AGR2	10551	CASP10	843	LRRC18	474354	10.6362	0	0
AGR2	10551	GNAT1	2779	ATAD2	29028	10.5537	0	0			AGR2	10551	CCL25	6370	XKRX	402415	10.6084	0.673329	0
AGR2	10551	TMOD3	29766	SMOX	54498	10.5511	0	0			AGR2	10551	GNAT1	2779	ATAD2	29028	10.5537	0	0
AGR2	10551	SLPI	6590	DOCK5	80005	10.539	0	0			AGR2	10551	TMOD3	29766	SMOX	54498	10.5511	0	0
AGR2	10551	FCN3	8547	SNRK	54861	10.5036	0	0			AGR2	10551	SLPI	6590	DOCK5	80005	10.539	0	0
AGR2	10551	ID1	3397	PTPRB	5787	10.4838	0	0			AGR2	10551	FCN3	8547	SNRK	54861	10.5036	0	0
AGR2	10551	GNAT1	2779	MBNL1	4154	10.4426	1.04872	0			AGR2	10551	ID1	3397	PTPRB	5787	10.4838	0	0
AGR2	10551	PTPRB	5787	FAM107A	11170	10.435	0	0			AGR2	10551	GNAT1	2779	MBNL1	4154	10.4426	1.04872	0
AGR2	10551	HIST1H1B	3009	DLL4	54567	10.3818	1.0152	0			AGR2	10551	PTPRB	5787	FAM107A	11170	10.435	0	0
AGR2	10551	ATAD2	29028	OR5B12	390191	10.3674	0	0			AGR2	10551	HIST1H1B	3009	DLL4	54567	10.3818	1.0152	0
AGR2	10551	PCDHA3	56145	SPTY2D1	144108	10.3566	0	0			AGR2	10551	ATAD2	29028	OR5B12	390191	10.3674	0	0
AGR2	10551	PTPRB	5787	SNRK	54861	10.3502	1.85365	0			AGR2	10551	PCDHA3	56145	SPTY2D1	144108	10.3566	0	0
AGR2	10551	FOXA3	3171	AGR2	10551	10.2885	1.06841	0			AGR2	10551	PTPRB	5787	SNRK	54861	10.3502	1.85365	0
AGR2	10551	MBNL1	4154	STX1A	6804	10.2768	1.32644	0			AGR2	10551	FOXA3	3171	AGR2	10551	10.2885	1.06841	0
AGR2	10551	NME5	8382	PCDHA3	56145	10.2753	1.3235	0			AGR2	10551	MBNL1	4154	STX1A	6804	10.2768	1.32644	0
AGR2	10551	FOXA3	3171	DOCK5	80005	10.2453	0.711989	0			AGR2	10551	NME5	8382	PCDHA3	56145	10.2753	1.3235	0
AGR2	10551	BDKRB2	624	WFDC1	58189	10.2249	0	0			AGR2	10551	FOXA3	3171	DOCK5	80005	10.2453	0.711989	0
AGR2	10551	KCNE1	3753	KCNK3	3777	10.1915	0.218104	0			AGR2	10551	BDKRB2	624	WFDC1	58189	10.2249	0	0
AGR2	10551	ATAD2	29028	MGC11266	79172	10.1614	0	0			AGR2	10551	KCNE1	3753	KCNK3	3777	10.1915	0.218104	0
AGR2	10551	ASAH1	427	C9orf26	90865	10.1573	0	0			AGR2	10551	ATAD2	29028	MGC11266	79172	10.1614	0	0
AGR2	10551	CUEDC2	79004	LOC402221	402221	10.1301	0	0			AGR2	10551	ASAH1	427	C9orf26	90865	10.1573	0	0
AGR2	10551	TBX3	6926	UPB1	51733	10.1143	0	0			AGR2	10551	CUEDC2	79004	LOC402221	402221	10.1301	0	0
AGR2	10551	AGR2	10551	FAM83E	54854	10.0958	0	0			AGR2	10551	TBX3	6926	UPB1	51733	10.1143	0	0
AGR2	10551	ASAH1	427	THSD1	55901	10.0198	0.387725	0			AGR2	10551	AGR2	10551	FAM83E	54854	10.0958	0	0
AGR2	10551	PSMD2	5708	MGC11266	79172	10.0095	0.101533	0			AGR2	10551	ASAH1	427	THSD1	55901	10.0198	0.387725	0
AGR2	10551	TEK	7010	SNRK	54861	10.0037	3.49003	0			AGR2	10551	PSMD2	5708	MGC11266	79172	10.0095	0.101533	0
AGR2	10551	BCHE	590	FAM107A	11170	9.99706	0	0			AGR2	10551	TEK	7010	SNRK	54861	10.0037	3.49003	0
AGR2	10551	CASP10	843	PTPRN2	5799	9.99238	0	0			AGR2	10551	BCHE	590	FAM107A	11170	9.99706	0	0
AGR2	10551	BCHE	590	CA4	762	9.98034	0	0			AGR2	10551	CASP10	843	PTPRN2	5799	9.99238	0	0
AGR2	10551	ITLN1	55600	ITLN2	142683	9.97025	0	0			AGR2	10551	BCHE	590	CA4	762	9.98034	0	0
AGR2	10551	ZNF646	9726	RNPS1	10921	9.948	0	0			AGR2	10551	ITLN1	55600	ITLN2	142683	9.97025	0	0
AGR2	10551	HMGCS2	3158	ERN2	10595	9.94127	0	0			AGR2	10551	ZNF646	9726	RNPS1	10921	9.948	0	0
AGR2	10551	SNRK	54861	C9orf26	90865	9.93369	3.85696	0			AGR2	10551	HMGCS2	3158	ERN2	10595	9.94127	0	0
AGR2	10551	REEP5	7905	APOL2	23780	9.92259	0	0			AGR2	10551	SNRK	54861	C9orf26	90865	9.93369	3.85696	0
AGR2	10551	ID1	3397	KCNK3	3777	9.86272	0	0			AGR2	10551	REEP5	7905	APOL2	23780	9.92259	0	0
AGR2	10551	CA4	762	TEK	7010	9.84104	0.764758	0			AGR2	10551	ID1	3397	KCNK3	3777	9.86272	0	0
AGR2	10551	SLPI	6590	FAM83E	54854	9.83754	2.10974	0			AGR2	10551	CA4	762	TEK	7010	9.84104	0.764758	0
AGR2	10551	PRRG2	5639	EFCAB1	79645	9.83155	0	0			AGR2	10551	SLPI	6590	FAM83E	54854	9.83754	2.10974	0
AGR2	10551	FAM107A	11170	FAM83E	54854	9.83047	0	0			AGR2	10551	PRRG2	5639	EFCAB1	79645	9.83155	0	0
AGR2	10551	APOL1	8542	C15orf26	161502	9.8265	0	0			AGR2	10551	FAM107A	11170	FAM83E	54854	9.83047	0	0
AGR2	10551	PTPRN2	5799	ZDHHC3	51304	9.81293	0	0			AGR2	10551	APOL1	8542	C15orf26	161502	9.8265	0	0
AGR2	10551	HLA-DRB4	3126	DYNC2H1	79659	9.79277	0	0			AGR2	10551	PTPRN2	5799	ZDHHC3	51304	9.81293	0	0
AGR2	10551	OSBPL2	9885	PCDHA3	56145	9.78686	0	0			AGR2	10551	HLA-DRB4	3126	DYNC2H1	79659	9.79277	0	0
AGR2	10551	CASP10	843	VIP	7432	9.7029	0	0			AGR2	10551	OSBPL2	9885	PCDHA3	56145	9.78686	0	0
AGR2	10551	YARS	8565	WDR78	79819	9.6951	0	0			AGR2	10551	CASP10	843	VIP	7432	9.7029	0	0
AGR2	10551	EFEMP1	2202	OSBPL2	9885	9.67224	0.149614	0			AGR2	10551	YARS	8565	WDR78	79819	9.6951	0	0
AGR2	10551	SRM	6723	PSAT1	29968	9.66862	0	0			AGR2	10551	EFEMP1	2202	OSBPL2	9885	9.67224	0.149614	0
AGR2	10551	YARS	8565	SNRK	54861	9.61671	0	0			AGR2	10551	SRM	6723	PSAT1	29968	9.66862	0	0
AGR2	10551	AGR2	10551	DOCK5	80005	9.59851	0	0			AGR2	10551	YARS	8565	SNRK	54861	9.61671	0	0
AGR2	10551	SNRPA	6626	DYNC2H1	79659	9.59715	0	0			AGR2	10551	AGR2	10551	DOCK5	80005	9.59851	0	0
AGR2	10551	PSMD11	5717	ATAD2	29028	9.5875	1.32243	0			AGR2	10551	SNRPA	6626	DYNC2H1	79659	9.59715	0	0
AGR2	10551	CKB	1152	S100A3	6274	9.58661	0	0			AGR2	10551	PSMD11	5717	ATAD2	29028	9.5875	1.32243	0
AGR2	10551	CKB	1152	NME5	8382	9.56739	1.22662	0			AGR2	10551	CKB	1152	S100A3	6274	9.58661	0	0
AGR2	10551	P2RY4	5030	DYNC2H1	79659	9.56311	1.33467	0			AGR2	10551	CKB	1152	NME5	8382	9.56739	1.22662	0
AGR2	10551	FOXA3	3171	PTPRN2	5799	9.55747	0.240886	0			AGR2	10551	P2RY4	5030	DYNC2H1	79659	9.56311	1.33467	0
AGR2	10551	RBM25	58517	OR5B12	390191	9.54757	0.0225128	0			AGR2	10551	FOXA3	3171	PTPRN2	5799	9.55747	0.240886	0
AGR2	10551	APOL2	23780	IGSF22	283284	9.5469	0	0			AGR2	10551	RBM25	58517	OR5B12	390191	9.54757	0.0225128	0
AGR2	10551	VIP	7432	FAM83E	54854	9.52916	0.0850583	0			AGR2	10551	APOL2	23780	IGSF22	283284	9.5469	0	0
AGR2	10551	HPD	3242	RAVER2	55225	9.5233	0.0396713	0			AGR2	10551	VIP	7432	FAM83E	54854	9.52916	0.0850583	0
AGR2	10551	HIST1H1B	3009	LOC148709	148709	9.50967	0	0			AGR2	10551	HPD	3242	RAVER2	55225	9.5233	0.0396713	0
AGR2	10551	DLL4	54567	XKRX	402415	9.50824	0	0			AGR2	10551	HIST1H1B	3009	LOC148709	148709	9.50967	0	0
AGR2	10551	TBX3	6926	SPAG6	9576	9.50608	0	0			AGR2	10551	DLL4	54567	XKRX	402415	9.50824	0	0
AGR2	10551	PTPRB	5787	FCN3	8547	9.50176	0	0			AGR2	10551	TBX3	6926	SPAG6	9576	9.50608	0	0
AGR2	10551	AGR2	10551	CUEDC2	79004	9.49163	0.220325	0			AGR2	10551	PTPRB	5787	FCN3	8547	9.50176	0	0
AGR2	10551	TMOD3	29766	C15orf26	161502	9.47913	0	0			AGR2	10551	AGR2	10551	CUEDC2	79004	9.49163	0.220325	0
AGR2	10551	KCNE1	3753	LRRC18	474354	9.46393	8.51812	0			AGR2	10551	TMOD3	29766	C15orf26	161502	9.47913	0	0
AGR2	10551	P2RY4	5030	APOL2	23780	9.43142	0	0			AGR2	10551	KCNE1	3753	LRRC18	474354	9.46393	8.51812	0
AGR2	10551	STX1A	6804	AGR2	10551	9.38264	0	0			AGR2	10551	P2RY4	5030	APOL2	23780	9.43142	0	0
AGR2	10551	ALB	213	ASAH1	427	9.3764	0	0			AGR2	10551	STX1A	6804	AGR2	10551	9.38264	0	0
AGR2	10551	WNT11	7481	ATAD2	29028	9.3627	0	0			AGR2	10551	ALB	213	ASAH1	427	9.3764	0	0
AGR2	10551	RCC1	1104	S100A3	6274	9.35028	0	0			AGR2	10551	WNT11	7481	ATAD2	29028	9.3627	0	0
AGR2	10551	PTPRN2	5799	AGR2	10551	9.3356	0.44212	0			AGR2	10551	RCC1	1104	S100A3	6274	9.35028	0	0
AGR2	10551	ALB	213	EFEMP1	2202	9.29248	0	0			AGR2	10551	PTPRN2	5799	AGR2	10551	9.3356	0.44212	0
AGR2	10551	EFEMP1	2202	RNF141	50862	9.28419	0	0			AGR2	10551	ALB	213	EFEMP1	2202	9.29248	0	0
AGR2	10551	FOXA3	3171	PANX2	56666	9.27719	0.371378	0			AGR2	10551	EFEMP1	2202	RNF141	50862	9.28419	0	0
AGR2	10551	PDE5A	8654	FAM83E	54854	9.2677	0	0			AGR2	10551	FOXA3	3171	PANX2	56666	9.27719	0.371378	0
AGR2	10551	AGR2	10551	ACP6	51205	9.24469	0	0			AGR2	10551	PDE5A	8654	FAM83E	54854	9.2677	0	0
AGR2	10551	CCL25	6370	DLL4	54567	9.2261	0	0			AGR2	10551	AGR2	10551	ACP6	51205	9.24469	0	0
AGR2	10551	SNRK	54861	MMRN2	79812	9.21557	0	0			AGR2	10551	CCL25	6370	DLL4	54567	9.2261	0	0
AGR2	10551	HIST1H1B	3009	RAVER2	55225	9.19486	0	0			AGR2	10551	SNRK	54861	MMRN2	79812	9.21557	0	0
AGR2	10551	PTPRB	5787	EFCAB1	79645	9.16483	1.5318	0			AGR2	10551	HIST1H1B	3009	RAVER2	55225	9.19486	0	0
AGR2	10551	KCNE1	3753	PSAT1	29968	9.14766	0	0			AGR2	10551	PTPRB	5787	EFCAB1	79645	9.16483	1.5318	0
AGR2	10551	BCHE	590	RPGR	6103	9.14174	0.23549	0			AGR2	10551	KCNE1	3753	PSAT1	29968	9.14766	0	0
AGR2	10551	MUC5AC	4586	ERN2	10595	9.13072	0.589802	0			AGR2	10551	BCHE	590	RPGR	6103	9.14174	0.23549	0
AGR2	10551	KCNK3	3777	FAM107A	11170	9.11762	2.01898	0			AGR2	10551	MUC5AC	4586	ERN2	10595	9.13072	0.589802	0
AGR2	10551	MBNL1	4154	IGSF22	283284	9.10732	0	0			AGR2	10551	KCNK3	3777	FAM107A	11170	9.11762	2.01898	0
AGR2	10551	PTPRB	5787	WDR78	79819	9.07026	1.05956	0			AGR2	10551	MBNL1	4154	IGSF22	283284	9.10732	0	0
AGR2	10551	SPDEF	25803	RNF141	50862	9.05394	0	0			AGR2	10551	PTPRB	5787	WDR78	79819	9.07026	1.05956	0
AGR2	10551	PSMD2	5708	RNPS1	10921	9.04584	2.41365	0			AGR2	10551	SPDEF	25803	RNF141	50862	9.05394	0	0
AGR2	10551	CAPS	828	UPB1	51733	9.03846	0	0			AGR2	10551	PSMD2	5708	RNPS1	10921	9.04584	2.41365	0
AGR2	10551	KCNK3	3777	SNRK	54861	8.99568	0	0			AGR2	10551	CAPS	828	UPB1	51733	9.03846	0	0
AGR2	10551	WFDC1	58189	KIF12	113220	8.99315	0	0			AGR2	10551	KCNK3	3777	SNRK	54861	8.99568	0	0
AGR2	10551	PDE5A	8654	KIF12	113220	8.97912	1.55605	0			AGR2	10551	WFDC1	58189	KIF12	113220	8.99315	0	0
AGR2	10551	GNAT1	2779	C15orf26	161502	8.97095	0	0			AGR2	10551	PDE5A	8654	KIF12	113220	8.97912	1.55605	0
AGR2	10551	ATAD2	29028	FAM83E	54854	8.95355	0	0			AGR2	10551	GNAT1	2779	C15orf26	161502	8.97095	0	0
AGR2	10551	RCC1	1104	AGR2	10551	8.95199	0	0			AGR2	10551	ATAD2	29028	FAM83E	54854	8.95355	0	0
AGR2	10551	ZNF646	9726	STUB1	10273	8.95013	0.207868	0			AGR2	10551	RCC1	1104	AGR2	10551	8.95199	0	0
AGR2	10551	OR5B12	390191	XKRX	402415	8.94268	0	0			AGR2	10551	ZNF646	9726	STUB1	10273	8.95013	0.207868	0
AGR2	10551	TEK	7010	FCN3	8547	8.92697	1.13673	0			AGR2	10551	OR5B12	390191	XKRX	402415	8.94268	0	0
AGR2	10551	RPGR	6103	WDR78	79819	8.91914	1.5383	0			AGR2	10551	TEK	7010	FCN3	8547	8.92697	1.13673	0
AGR2	10551	PTPRN2	5799	STUB1	10273	8.90885	2.13937	0			AGR2	10551	RPGR	6103	WDR78	79819	8.91914	1.5383	0
AGR2	10551	AGR2	10551	MANEAL	149175	8.86489	0	0			AGR2	10551	PTPRN2	5799	STUB1	10273	8.90885	2.13937	0
AGR2	10551	MGC13040	85016	C6orf201	404220	8.85624	0.86413	0			AGR2	10551	AGR2	10551	MANEAL	149175	8.86489	0	0
AGR2	10551	CASP10	843	ATAD2	29028	8.83633	0	0			AGR2	10551	MGC13040	85016	C6orf201	404220	8.85624	0.86413	0
AGR2	10551	KCNK3	3777	TEK	7010	8.83419	0	0			AGR2	10551	CASP10	843	ATAD2	29028	8.83633	0	0
AGR2	10551	GMDS	2762	TTTY9B	425057	8.82073	0	0			AGR2	10551	KCNK3	3777	TEK	7010	8.83419	0	0
AGR2	10551	ALB	213	REEP5	7905	8.81457	0	0			AGR2	10551	GMDS	2762	TTTY9B	425057	8.82073	0	0
AGR2	10551	BCHE	590	PTPRB	5787	8.81294	0	0			AGR2	10551	ALB	213	REEP5	7905	8.81457	0	0
AGR2	10551	MGC11266	79172	OR5B12	390191	8.8047	0	0			AGR2	10551	BCHE	590	PTPRB	5787	8.81294	0	0
AGR2	10551	ALB	213	UGT2B10	7365	8.79521	0.444113	0			AGR2	10551	MGC11266	79172	OR5B12	390191	8.8047	0	0
AGR2	10551	ASAH1	427	CA4	762	8.79124	1.88318	0			AGR2	10551	ALB	213	UGT2B10	7365	8.79521	0.444113	0
AGR2	10551	CA4	762	LPGAT1	9926	8.79053	0	0			AGR2	10551	ASAH1	427	CA4	762	8.79124	1.88318	0
AGR2	10551	KLHL4	56062	TTTY9B	425057	8.78988	0	0			AGR2	10551	CA4	762	LPGAT1	9926	8.79053	0	0
AGR2	10551	WFDC1	58189	EFCAB1	79645	8.78673	1.88425	0			AGR2	10551	KLHL4	56062	TTTY9B	425057	8.78988	0	0
AGR2	10551	BDKRB2	624	C15orf26	161502	8.78144	0	0			AGR2	10551	WFDC1	58189	EFCAB1	79645	8.78673	1.88425	0
AGR2	10551	ALB	213	NME5	8382	8.75545	0.455541	0			AGR2	10551	BDKRB2	624	C15orf26	161502	8.78144	0	0
AGR2	10551	HMGCS2	3158	SPAG6	9576	8.74718	1.38761	0			AGR2	10551	ALB	213	NME5	8382	8.75545	0.455541	0
AGR2	10551	KCNE1	3753	FAM83E	54854	8.68336	0	0			AGR2	10551	HMGCS2	3158	SPAG6	9576	8.74718	1.38761	0
AGR2	10551	SPAG6	9576	AGR2	10551	8.68121	0.258872	0			AGR2	10551	KCNE1	3753	FAM83E	54854	8.68336	0	0
AGR2	10551	HSP90AB1	3326	EXOSC8	11340	8.67638	0	0			AGR2	10551	SPAG6	9576	AGR2	10551	8.68121	0.258872	0
AGR2	10551	REEP5	7905	TTTY9B	425057	8.67542	1.91305	0			AGR2	10551	HSP90AB1	3326	EXOSC8	11340	8.67638	0	0
AGR2	10551	CKB	1152	AGR2	10551	8.67338	0.802426	0			AGR2	10551	REEP5	7905	TTTY9B	425057	8.67542	1.91305	0
AGR2	10551	HIST1H1B	3009	AGR2	10551	8.67008	0	0			AGR2	10551	CKB	1152	AGR2	10551	8.67338	0.802426	0
AGR2	10551	EFCAB1	79645	C9orf26	90865	8.64127	0	0			AGR2	10551	HIST1H1B	3009	AGR2	10551	8.67008	0	0
AGR2	10551	MGC11266	79172	LOC402221	402221	8.63042	1.13722	0			AGR2	10551	EFCAB1	79645	C9orf26	90865	8.64127	0	0
AGR2	10551	EFEMP1	2202	REEP5	7905	8.62921	1.63626	0			AGR2	10551	MGC11266	79172	LOC402221	402221	8.63042	1.13722	0
AGR2	10551	AGR2	10551	RAVER2	55225	8.62698	0	0			AGR2	10551	EFEMP1	2202	REEP5	7905	8.62921	1.63626	0
AGR2	10551	ATAD2	29028	RBM25	58517	8.5912	0	0			AGR2	10551	AGR2	10551	RAVER2	55225	8.62698	0	0
AGR2	10551	SPAG6	9576	ARMC4	55130	8.58514	11.7492	0			AGR2	10551	ATAD2	29028	RBM25	58517	8.5912	0	0
AGR2	10551	UPB1	51733	RAVER2	55225	8.5513	0	0			AGR2	10551	SPAG6	9576	ARMC4	55130	8.58514	11.7492	0
AGR2	10551	PRRG2	5639	KLHL4	56062	8.54099	0	0			AGR2	10551	UPB1	51733	RAVER2	55225	8.5513	0	0
AGR2	10551	SPAG6	9576	WFDC1	58189	8.54083	1.07142	0			AGR2	10551	PRRG2	5639	KLHL4	56062	8.54099	0	0
AGR2	10551	FAM107A	11170	RNF141	50862	8.53654	0	0			AGR2	10551	SPAG6	9576	WFDC1	58189	8.54083	1.07142	0
AGR2	10551	PTPRB	5787	AGR2	10551	8.52983	0.935648	0			AGR2	10551	FAM107A	11170	RNF141	50862	8.53654	0	0
AGR2	10551	HPD	3242	STX1A	6804	8.52936	0	0			AGR2	10551	PTPRB	5787	AGR2	10551	8.52983	0.935648	0
AGR2	10551	MUC5AC	4586	TMOD3	29766	8.52177	0.678179	0			AGR2	10551	HPD	3242	STX1A	6804	8.52936	0	0
AGR2	10551	ART4	420	MANEAL	149175	8.52058	0	0			AGR2	10551	MUC5AC	4586	TMOD3	29766	8.52177	0.678179	0
AGR2	10551	REEP5	7905	APOL1	8542	8.50507	0.738377	0			AGR2	10551	ART4	420	MANEAL	149175	8.52058	0	0
AGR2	10551	MUC5AC	4586	PANX2	56666	8.50008	2.02218	0			AGR2	10551	REEP5	7905	APOL1	8542	8.50507	0.738377	0
AGR2	10551	EFEMP1	2202	SPTY2D1	144108	8.49953	0.443675	0			AGR2	10551	MUC5AC	4586	PANX2	56666	8.50008	2.02218	0
AGR2	10551	BCHE	590	ANP32A	8125	8.48844	0.96724	0			AGR2	10551	EFEMP1	2202	SPTY2D1	144108	8.49953	0.443675	0
AGR2	10551	KCNK3	3777	PTPRB	5787	8.4732	0	0			AGR2	10551	BCHE	590	ANP32A	8125	8.48844	0.96724	0
AGR2	10551	PANX2	56666	WDR63	126820	8.44164	0.231961	0			AGR2	10551	KCNK3	3777	PTPRB	5787	8.4732	0	0
AGR2	10551	ID1	3397	SNRK	54861	8.41793	0	0			AGR2	10551	PANX2	56666	WDR63	126820	8.44164	0.231961	0
AGR2	10551	SNRK	54861	LRRC18	474354	8.40008	0	0			AGR2	10551	ID1	3397	SNRK	54861	8.41793	0	0
AGR2	10551	MRPS31	10240	ATAD2	29028	8.39981	0	0			AGR2	10551	SNRK	54861	LRRC18	474354	8.40008	0	0
AGR2	10551	SLPI	6590	TTTY9B	425057	8.39653	0	0			AGR2	10551	MRPS31	10240	ATAD2	29028	8.39981	0	0
AGR2	10551	CAPS	828	C6orf201	404220	8.39452	0.625228	0			AGR2	10551	SLPI	6590	TTTY9B	425057	8.39653	0	0
AGR2	10551	ATAD2	29028	MMRN2	79812	8.3886	0	0			AGR2	10551	CAPS	828	C6orf201	404220	8.39452	0.625228	0
AGR2	10551	SPAG6	9576	ERN2	10595	8.38826	2.23777	0			AGR2	10551	ATAD2	29028	MMRN2	79812	8.3886	0	0
AGR2	10551	BCHE	590	MMRN2	79812	8.38625	3.04758	0			AGR2	10551	SPAG6	9576	ERN2	10595	8.38826	2.23777	0
AGR2	10551	FOXA3	3171	PCDHAC1	56135	8.38187	0	0			AGR2	10551	BCHE	590	MMRN2	79812	8.38625	3.04758	0
AGR2	10551	YARS	8565	ERN2	10595	8.381	0	0			AGR2	10551	FOXA3	3171	PCDHAC1	56135	8.38187	0	0
AGR2	10551	REEP5	7905	FAM83E	54854	8.37426	0	0			AGR2	10551	YARS	8565	ERN2	10595	8.381	0	0
AGR2	10551	ALB	213	OSBPL2	9885	8.36629	0	0			AGR2	10551	REEP5	7905	FAM83E	54854	8.37426	0	0
AGR2	10551	P2RY4	5030	ACP6	51205	8.34794	0	0			AGR2	10551	ALB	213	OSBPL2	9885	8.36629	0	0
AGR2	10551	CASP10	843	SNRK	54861	8.34379	0	0			AGR2	10551	P2RY4	5030	ACP6	51205	8.34794	0	0
AGR2	10551	HLA-DRB4	3126	P2RY4	5030	8.34181	1.34936	0			AGR2	10551	CASP10	843	SNRK	54861	8.34379	0	0
AGR2	10551	RCC1	1104	HMGCS2	3158	8.33203	1.48291	0			AGR2	10551	HLA-DRB4	3126	P2RY4	5030	8.34181	1.34936	0
AGR2	10551	KCNK3	3777	PDE5A	8654	8.32627	0.288488	0			AGR2	10551	RCC1	1104	HMGCS2	3158	8.33203	1.48291	0
AGR2	10551	NME5	8382	SPTY2D1	144108	8.29447	0	0			AGR2	10551	KCNK3	3777	PDE5A	8654	8.32627	0.288488	0
AGR2	10551	HMGCS2	3158	FOXA3	3171	8.28645	0.677684	0			AGR2	10551	NME5	8382	SPTY2D1	144108	8.29447	0	0
AGR2	10551	PRRG2	5639	ARMC4	55130	8.27748	0	0			AGR2	10551	HMGCS2	3158	FOXA3	3171	8.28645	0.677684	0
AGR2	10551	IER3	8870	PSAT1	29968	8.26619	0	0			AGR2	10551	PRRG2	5639	ARMC4	55130	8.27748	0	0
AGR2	10551	ART4	420	SNRPA	6626	8.2548	0	0			AGR2	10551	IER3	8870	PSAT1	29968	8.26619	0	0
AGR2	10551	PSMD11	5717	RAPGEF6	51735	8.25045	1.3082	0			AGR2	10551	ART4	420	SNRPA	6626	8.2548	0	0
AGR2	10551	ANP32A	8125	STARD7	56910	8.24357	0	0			AGR2	10551	PSMD11	5717	RAPGEF6	51735	8.25045	1.3082	0
AGR2	10551	VIP	7432	PDE5A	8654	8.23838	1.58679	0			AGR2	10551	ANP32A	8125	STARD7	56910	8.24357	0	0
AGR2	10551	WFDC1	58189	XKRX	402415	8.22679	0	0			AGR2	10551	VIP	7432	PDE5A	8654	8.23838	1.58679	0
AGR2	10551	FOXA3	3171	ID1	3397	8.21688	0	0			AGR2	10551	WFDC1	58189	XKRX	402415	8.22679	0	0
AGR2	10551	ARMC4	55130	C6orf201	404220	8.21485	1.23787	0			AGR2	10551	FOXA3	3171	ID1	3397	8.21688	0	0
AGR2	10551	UGT2B10	7365	PCDHA3	56145	8.21456	0	0			AGR2	10551	ARMC4	55130	C6orf201	404220	8.21485	1.23787	0
AGR2	10551	WNT11	7481	ADCY4	196883	8.2076	1.40822	0			AGR2	10551	UGT2B10	7365	PCDHA3	56145	8.21456	0	0
AGR2	10551	PDE5A	8654	SNRK	54861	8.19463	3.40775	0			AGR2	10551	WNT11	7481	ADCY4	196883	8.2076	1.40822	0
AGR2	10551	PANX2	56666	DOCK5	80005	8.19268	0	0			AGR2	10551	PDE5A	8654	SNRK	54861	8.19463	3.40775	0
AGR2	10551	THSD1	55901	ITLN2	142683	8.19085	0	0			AGR2	10551	PANX2	56666	DOCK5	80005	8.19268	0	0
AGR2	10551	GMDS	2762	ZDHHC3	51304	8.18589	0	0			AGR2	10551	THSD1	55901	ITLN2	142683	8.19085	0	0
AGR2	10551	KCNK3	3777	RAVER2	55225	8.15231	0	0			AGR2	10551	GMDS	2762	ZDHHC3	51304	8.18589	0	0
AGR2	10551	FOXA3	3171	ERN2	10595	8.15053	0	0			AGR2	10551	KCNK3	3777	RAVER2	55225	8.15231	0	0
AGR2	10551	UPB1	51733	C15orf26	161502	8.14947	0.124121	0			AGR2	10551	FOXA3	3171	ERN2	10595	8.15053	0	0
AGR2	10551	MBNL1	4154	C15orf26	161502	8.12995	0	0			AGR2	10551	UPB1	51733	C15orf26	161502	8.14947	0.124121	0
AGR2	10551	S100A3	6274	YARS	8565	8.11063	0	0			AGR2	10551	MBNL1	4154	C15orf26	161502	8.12995	0	0
AGR2	10551	ART4	420	KLHL4	56062	8.10324	0	0			AGR2	10551	S100A3	6274	YARS	8565	8.11063	0	0
AGR2	10551	PTPRN2	5799	RPGR	6103	8.08362	0.846579	0			AGR2	10551	ART4	420	KLHL4	56062	8.10324	0	0
AGR2	10551	ERN2	10595	FAM83E	54854	8.07801	3.39014	0			AGR2	10551	PTPRN2	5799	RPGR	6103	8.08362	0.846579	0
AGR2	10551	MGC13040	85016	SPTY2D1	144108	8.0634	0	0			AGR2	10551	ERN2	10595	FAM83E	54854	8.07801	3.39014	0
AGR2	10551	DBH	1621	WDR78	79819	8.0583	2.34148	0			AGR2	10551	MGC13040	85016	SPTY2D1	144108	8.0634	0	0
AGR2	10551	VIP	7432	AGR2	10551	8.05169	2.89604	0			AGR2	10551	DBH	1621	WDR78	79819	8.0583	2.34148	0
AGR2	10551	CKB	1152	ZNF646	9726	8.0471	0	0			AGR2	10551	VIP	7432	AGR2	10551	8.05169	2.89604	0
AGR2	10551	RNF141	50862	SPTY2D1	144108	8.04104	0	0			AGR2	10551	CKB	1152	ZNF646	9726	8.0471	0	0
AGR2	10551	ERN2	10595	ITLN2	142683	8.03036	0	0			AGR2	10551	RNF141	50862	SPTY2D1	144108	8.04104	0	0
AGR2	10551	MBNL1	4154	UPB1	51733	8.02917	2.34958	0			AGR2	10551	ERN2	10595	ITLN2	142683	8.03036	0	0
AGR2	10551	FAM107A	11170	KIF12	113220	8.00992	0.337754	0			AGR2	10551	MBNL1	4154	UPB1	51733	8.02917	2.34958	0
AGR2	10551	SNRPA	6626	WDR78	79819	8.00788	0	0			AGR2	10551	FAM107A	11170	KIF12	113220	8.00992	0.337754	0
AGR2	10551	FOXA3	3171	WDR78	79819	8.00394	0	0			AGR2	10551	SNRPA	6626	WDR78	79819	8.00788	0	0
AGR2	10551	PTPRB	5787	PTPRN2	5799	7.99745	0	0			AGR2	10551	FOXA3	3171	WDR78	79819	8.00394	0	0
AGR2	10551	FOXA3	3171	PTPRB	5787	7.99297	1.22999	0			AGR2	10551	PTPRB	5787	PTPRN2	5799	7.99745	0	0
AGR2	10551	KCNE1	3753	REEP5	7905	7.98978	0	0			AGR2	10551	FOXA3	3171	PTPRB	5787	7.99297	1.22999	0
AGR2	10551	AGR2	10551	TMOD3	29766	7.97319	0	0			AGR2	10551	KCNE1	3753	REEP5	7905	7.98978	0	0
AGR2	10551	DFFA	1676	RAVER2	55225	7.97133	1.53837	0			AGR2	10551	AGR2	10551	TMOD3	29766	7.97319	0	0
AGR2	10551	KCNE1	3753	EFCAB1	79645	7.97001	6.04445	0			AGR2	10551	DFFA	1676	RAVER2	55225	7.97133	1.53837	0
AGR2	10551	GNAT1	2779	UPB1	51733	7.96644	0	0			AGR2	10551	KCNE1	3753	EFCAB1	79645	7.97001	6.04445	0
AGR2	10551	PSMD11	5717	AGR2	10551	7.9616	0	0			AGR2	10551	GNAT1	2779	UPB1	51733	7.96644	0	0
AGR2	10551	KCNE1	3753	C15orf26	161502	7.95785	10.0592	0			AGR2	10551	PSMD11	5717	AGR2	10551	7.9616	0	0
AGR2	10551	ID1	3397	UGT2B10	7365	7.93515	0	0			AGR2	10551	KCNE1	3753	C15orf26	161502	7.95785	10.0592	0
AGR2	10551	ERN2	10595	C9orf26	90865	7.934	1.02968	0			AGR2	10551	ID1	3397	UGT2B10	7365	7.93515	0	0
AGR2	10551	NME5	8382	EFCAB1	79645	7.8976	12.2801	0			AGR2	10551	ERN2	10595	C9orf26	90865	7.934	1.02968	0
AGR2	10551	PTPRN2	5799	EFCAB1	79645	7.89136	0	0			AGR2	10551	NME5	8382	EFCAB1	79645	7.8976	12.2801	0
AGR2	10551	S100A3	6274	LOC148709	148709	7.86547	0.0385504	0			AGR2	10551	PTPRN2	5799	EFCAB1	79645	7.89136	0	0
AGR2	10551	SLPI	6590	ATAD2	29028	7.85479	0	0			AGR2	10551	S100A3	6274	LOC148709	148709	7.86547	0.0385504	0
AGR2	10551	ATAD2	29028	MANEAL	149175	7.85313	0	0			AGR2	10551	SLPI	6590	ATAD2	29028	7.85479	0	0
AGR2	10551	HLA-DRB4	3126	ACP6	51205	7.84955	0.524813	0			AGR2	10551	ATAD2	29028	MANEAL	149175	7.85313	0	0
AGR2	10551	APOL1	8542	SMOX	54498	7.84924	0	0			AGR2	10551	HLA-DRB4	3126	ACP6	51205	7.84955	0.524813	0
AGR2	10551	BCHE	590	RBM25	58517	7.8437	0	0			AGR2	10551	APOL1	8542	SMOX	54498	7.84924	0	0
AGR2	10551	HIST1H1B	3009	C9orf26	90865	7.83918	0.490109	0			AGR2	10551	BCHE	590	RBM25	58517	7.8437	0	0
AGR2	10551	PRRG1	5638	TTTY9B	425057	7.83763	0	0			AGR2	10551	HIST1H1B	3009	C9orf26	90865	7.83918	0.490109	0
AGR2	10551	ATAD2	29028	UPB1	51733	7.83518	0	0			AGR2	10551	PRRG1	5638	TTTY9B	425057	7.83763	0	0
AGR2	10551	KCNK3	3777	FAM83E	54854	7.82774	0.150152	0			AGR2	10551	ATAD2	29028	UPB1	51733	7.83518	0	0
AGR2	10551	ZDHHC3	51304	SPTY2D1	144108	7.82673	0	0			AGR2	10551	KCNK3	3777	FAM83E	54854	7.82774	0.150152	0
AGR2	10551	FOXA3	3171	EFCAB1	79645	7.82523	0	0			AGR2	10551	ZDHHC3	51304	SPTY2D1	144108	7.82673	0	0
AGR2	10551	BDKRB2	624	ADCY4	196883	7.81975	0	0			AGR2	10551	FOXA3	3171	EFCAB1	79645	7.82523	0	0
AGR2	10551	ZDHHC18	84243	LOC148709	148709	7.81145	1.49728	0			AGR2	10551	BDKRB2	624	ADCY4	196883	7.81975	0	0
AGR2	10551	BCHE	590	WNT11	7481	7.80286	0	0			AGR2	10551	ZDHHC18	84243	LOC148709	148709	7.81145	1.49728	0
AGR2	10551	CKB	1152	TBC1D24	57465	7.79421	0.813462	0			AGR2	10551	BCHE	590	WNT11	7481	7.80286	0	0
AGR2	10551	FAM83E	54854	KIF12	113220	7.79273	0	0			AGR2	10551	CKB	1152	TBC1D24	57465	7.79421	0.813462	0
AGR2	10551	EFEMP1	2202	SHANK2	22941	7.79024	0.237884	0			AGR2	10551	FAM83E	54854	KIF12	113220	7.79273	0	0
AGR2	10551	VIP	7432	FCN3	8547	7.78714	0	0			AGR2	10551	EFEMP1	2202	SHANK2	22941	7.79024	0.237884	0
AGR2	10551	EFCAB1	79645	ADCY4	196883	7.78148	0.774718	0			AGR2	10551	VIP	7432	FCN3	8547	7.78714	0	0
AGR2	10551	RCC1	1104	YARS	8565	7.77988	0	0			AGR2	10551	EFCAB1	79645	ADCY4	196883	7.78148	0.774718	0
AGR2	10551	UGT2B10	7365	FAM83E	54854	7.7691	0	0			AGR2	10551	RCC1	1104	YARS	8565	7.77988	0	0
AGR2	10551	CA4	762	THSD1	55901	7.76357	2.10289	0			AGR2	10551	UGT2B10	7365	FAM83E	54854	7.7691	0	0
AGR2	10551	ACP6	51205	KLHL4	56062	7.7608	0.112695	0			AGR2	10551	CA4	762	THSD1	55901	7.76357	2.10289	0
AGR2	10551	GMDS	2762	UPB1	51733	7.75961	0	0			AGR2	10551	ACP6	51205	KLHL4	56062	7.7608	0.112695	0
AGR2	10551	PSAT1	29968	WFDC1	58189	7.75622	0	0			AGR2	10551	GMDS	2762	UPB1	51733	7.75961	0	0
AGR2	10551	RCC1	1104	POLB	5423	7.72757	0.225275	0			AGR2	10551	PSAT1	29968	WFDC1	58189	7.75622	0	0
AGR2	10551	RPGR	6103	ITLN2	142683	7.72657	1.48831	0			AGR2	10551	RCC1	1104	POLB	5423	7.72757	0.225275	0
AGR2	10551	PTPRN2	5799	ZNF646	9726	7.71493	0.583133	0			AGR2	10551	RPGR	6103	ITLN2	142683	7.72657	1.48831	0
AGR2	10551	SNRPA	6626	SPDEF	25803	7.70256	0.680732	0			AGR2	10551	PTPRN2	5799	ZNF646	9726	7.71493	0.583133	0
AGR2	10551	GMDS	2762	HMGCS2	3158	7.70205	0	0			AGR2	10551	SNRPA	6626	SPDEF	25803	7.70256	0.680732	0
AGR2	10551	FOXA3	3171	VIP	7432	7.68165	0.522915	0			AGR2	10551	GMDS	2762	HMGCS2	3158	7.70205	0	0
AGR2	10551	ATAD2	29028	TTTY9B	425057	7.67884	0	0			AGR2	10551	FOXA3	3171	VIP	7432	7.68165	0.522915	0
AGR2	10551	ID1	3397	FCN3	8547	7.67738	0	0			AGR2	10551	ATAD2	29028	TTTY9B	425057	7.67884	0	0
AGR2	10551	HIST1H1B	3009	XKRX	402415	7.67361	0	0			AGR2	10551	ID1	3397	FCN3	8547	7.67738	0	0
AGR2	10551	PSMD11	5717	TRAFD1	10906	7.66886	1.10048	0			AGR2	10551	HIST1H1B	3009	XKRX	402415	7.67361	0	0
AGR2	10551	AGR2	10551	UPB1	51733	7.64763	0	0			AGR2	10551	PSMD11	5717	TRAFD1	10906	7.66886	1.10048	0
AGR2	10551	ERN2	10595	TMOD3	29766	7.6246	0	0			AGR2	10551	AGR2	10551	UPB1	51733	7.64763	0	0
AGR2	10551	FCN3	8547	MMRN2	79812	7.62402	0.747692	0			AGR2	10551	ERN2	10595	TMOD3	29766	7.6246	0	0
AGR2	10551	MCC	4163	MANEAL	149175	7.60766	0	0			AGR2	10551	FCN3	8547	MMRN2	79812	7.62402	0.747692	0
AGR2	10551	HIST1H1B	3009	STUB1	10273	7.60498	0	0			AGR2	10551	MCC	4163	MANEAL	149175	7.60766	0	0
AGR2	10551	MUC5AC	4586	APOL1	8542	7.59955	0.128902	0			AGR2	10551	HIST1H1B	3009	STUB1	10273	7.60498	0	0
AGR2	10551	SLPI	6590	ERN2	10595	7.59039	1.36395	0			AGR2	10551	MUC5AC	4586	APOL1	8542	7.59955	0.128902	0
AGR2	10551	FAM83E	54854	ADCY4	196883	7.57967	0	0			AGR2	10551	SLPI	6590	ERN2	10595	7.59039	1.36395	0
AGR2	10551	SNRK	54861	KIF12	113220	7.5712	0	0			AGR2	10551	FAM83E	54854	ADCY4	196883	7.57967	0	0
AGR2	10551	UGT2B10	7365	PCDHAC1	56135	7.56536	0.39617	0			AGR2	10551	SNRK	54861	KIF12	113220	7.5712	0	0
AGR2	10551	AGR2	10551	WDR78	79819	7.55866	1.19075	0			AGR2	10551	UGT2B10	7365	PCDHAC1	56135	7.56536	0.39617	0
AGR2	10551	PRRG2	5639	CUEDC2	79004	7.55585	1.74374	0			AGR2	10551	AGR2	10551	WDR78	79819	7.55866	1.19075	0
AGR2	10551	MUC5AC	4586	SMOX	54498	7.55294	0	0			AGR2	10551	PRRG2	5639	CUEDC2	79004	7.55585	1.74374	0
AGR2	10551	RPGR	6103	LPGAT1	9926	7.552	0	0			AGR2	10551	MUC5AC	4586	SMOX	54498	7.55294	0	0
AGR2	10551	WNT11	7481	UPB1	51733	7.54774	0.386901	0			AGR2	10551	RPGR	6103	LPGAT1	9926	7.552	0	0
AGR2	10551	GNAT1	2779	APOL1	8542	7.53892	0.176414	0			AGR2	10551	WNT11	7481	UPB1	51733	7.54774	0.386901	0
AGR2	10551	STUB1	10273	STARD7	56910	7.5297	0.742958	0			AGR2	10551	GNAT1	2779	APOL1	8542	7.53892	0.176414	0
AGR2	10551	WNT11	7481	RBM25	58517	7.52297	0.841982	0			AGR2	10551	STUB1	10273	STARD7	56910	7.5297	0.742958	0
AGR2	10551	ANP32A	8125	RBM25	58517	7.51991	0	0			AGR2	10551	WNT11	7481	RBM25	58517	7.52297	0.841982	0
AGR2	10551	HIST1H1B	3009	OR5B12	390191	7.51961	0	0			AGR2	10551	ANP32A	8125	RBM25	58517	7.51991	0	0
AGR2	10551	CA4	762	FCN3	8547	7.51872	4.21342	0			AGR2	10551	HIST1H1B	3009	OR5B12	390191	7.51961	0	0
AGR2	10551	RPGR	6103	DYNC2H1	79659	7.49758	4.84545	0			AGR2	10551	CA4	762	FCN3	8547	7.51872	4.21342	0
AGR2	10551	RAVER2	55225	RBM25	58517	7.49463	0.580272	0			AGR2	10551	RPGR	6103	DYNC2H1	79659	7.49758	4.84545	0
AGR2	10551	SMOX	54498	ARMC4	55130	7.49261	0.205799	0			AGR2	10551	RAVER2	55225	RBM25	58517	7.49463	0.580272	0
AGR2	10551	SRM	6723	SPTY2D1	144108	7.4845	2.51698	0			AGR2	10551	SMOX	54498	ARMC4	55130	7.49261	0.205799	0
AGR2	10551	MANEAL	149175	C15orf26	161502	7.4726	0	0			AGR2	10551	SRM	6723	SPTY2D1	144108	7.4845	2.51698	0
AGR2	10551	CA4	762	AGR2	10551	7.47066	0	0			AGR2	10551	MANEAL	149175	C15orf26	161502	7.4726	0	0
AGR2	10551	BDKRB2	624	ERN2	10595	7.45908	0	0			AGR2	10551	CA4	762	AGR2	10551	7.47066	0	0
AGR2	10551	VIP	7432	REEP5	7905	7.45011	0	0			AGR2	10551	BDKRB2	624	ERN2	10595	7.45908	0	0
AGR2	10551	STUB1	10273	AGR2	10551	7.44893	1.28254	0			AGR2	10551	VIP	7432	REEP5	7905	7.45011	0	0
AGR2	10551	PTPRB	5787	PCDHAC1	56135	7.44519	0	0			AGR2	10551	STUB1	10273	AGR2	10551	7.44893	1.28254	0
AGR2	10551	STX1A	6804	SPDEF	25803	7.43516	1.8499	0			AGR2	10551	PTPRB	5787	PCDHAC1	56135	7.44519	0	0
AGR2	10551	AGR2	10551	C15orf26	161502	7.42939	3.30691	0			AGR2	10551	STX1A	6804	SPDEF	25803	7.43516	1.8499	0
AGR2	10551	ASAH1	427	ACP6	51205	7.40836	0	0			AGR2	10551	AGR2	10551	C15orf26	161502	7.42939	3.30691	0
AGR2	10551	CCL25	6370	THSD1	55901	7.39548	0.0327525	0			AGR2	10551	ASAH1	427	ACP6	51205	7.40836	0	0
AGR2	10551	PKHD1	5314	VIP	7432	7.38643	0	0			AGR2	10551	CCL25	6370	THSD1	55901	7.39548	0.0327525	0
AGR2	10551	P2RY4	5030	PSMD11	5717	7.37695	0	0			AGR2	10551	PKHD1	5314	VIP	7432	7.38643	0	0
AGR2	10551	REEP5	7905	OSBPL2	9885	7.36305	0	0			AGR2	10551	P2RY4	5030	PSMD11	5717	7.37695	0	0
AGR2	10551	MGC11266	79172	TTTY9B	425057	7.33747	0	0			AGR2	10551	REEP5	7905	OSBPL2	9885	7.36305	0	0
AGR2	10551	PTPRN2	5799	YARS	8565	7.33565	1.46816	0			AGR2	10551	MGC11266	79172	TTTY9B	425057	7.33747	0	0
AGR2	10551	FAM83E	54854	TTTY9B	425057	7.3341	0	0			AGR2	10551	PTPRN2	5799	YARS	8565	7.33565	1.46816	0
AGR2	10551	VIP	7432	SNRK	54861	7.33402	0.27991	0			AGR2	10551	FAM83E	54854	TTTY9B	425057	7.3341	0	0
AGR2	10551	VIP	7432	APOL1	8542	7.32811	0	0			AGR2	10551	VIP	7432	SNRK	54861	7.33402	0.27991	0
AGR2	10551	MUC5AC	4586	APOL2	23780	7.32759	0	0			AGR2	10551	VIP	7432	APOL1	8542	7.32811	0	0
AGR2	10551	TMOD3	29766	FAM83E	54854	7.32752	0.291692	0			AGR2	10551	MUC5AC	4586	APOL2	23780	7.32759	0	0
AGR2	10551	SNRK	54861	WFDC1	58189	7.3274	0.0258166	0			AGR2	10551	TMOD3	29766	FAM83E	54854	7.32752	0.291692	0
AGR2	10551	ASAH1	427	DLL4	54567	7.32052	0	0			AGR2	10551	SNRK	54861	WFDC1	58189	7.3274	0.0258166	0
AGR2	10551	PRRG2	5639	ATAD2	29028	7.30588	1.52551	0			AGR2	10551	ASAH1	427	DLL4	54567	7.32052	0	0
AGR2	10551	HIST1H1B	3009	RBM25	58517	7.30533	0	0			AGR2	10551	PRRG2	5639	ATAD2	29028	7.30588	1.52551	0
AGR2	10551	CASP10	843	RPGR	6103	7.30136	0	0			AGR2	10551	HIST1H1B	3009	RBM25	58517	7.30533	0	0
AGR2	10551	SLPI	6590	ARMC4	55130	7.29192	0.973732	0			AGR2	10551	CASP10	843	RPGR	6103	7.30136	0	0
AGR2	10551	PTPRB	5787	UGT2B10	7365	7.28597	0.568413	0			AGR2	10551	SLPI	6590	ARMC4	55130	7.29192	0.973732	0
AGR2	10551	POLB	5423	LOC148709	148709	7.28185	0.998029	0			AGR2	10551	PTPRB	5787	UGT2B10	7365	7.28597	0.568413	0
AGR2	10551	BCHE	590	WFDC1	58189	7.28137	0	0			AGR2	10551	POLB	5423	LOC148709	148709	7.28185	0.998029	0
AGR2	10551	KCNE1	3753	SNRK	54861	7.27442	0	0			AGR2	10551	BCHE	590	WFDC1	58189	7.28137	0	0
AGR2	10551	ERN2	10595	FAM107A	11170	7.26568	0	0			AGR2	10551	KCNE1	3753	SNRK	54861	7.27442	0	0
AGR2	10551	APOL1	8542	ZDHHC3	51304	7.2568	0.240166	0			AGR2	10551	ERN2	10595	FAM107A	11170	7.26568	0	0
AGR2	10551	VIP	7432	FAM107A	11170	7.25494	0.767128	0			AGR2	10551	APOL1	8542	ZDHHC3	51304	7.2568	0.240166	0
AGR2	10551	AGR2	10551	FAM107A	11170	7.24672	0	0			AGR2	10551	VIP	7432	FAM107A	11170	7.25494	0.767128	0
AGR2	10551	PCDHAC1	56135	WDR63	126820	7.2377	0	0			AGR2	10551	AGR2	10551	FAM107A	11170	7.24672	0	0
AGR2	10551	EFCAB1	79645	LRRC18	474354	7.22984	8.60743	0			AGR2	10551	PCDHAC1	56135	WDR63	126820	7.2377	0	0
AGR2	10551	APOL1	8542	FAM83E	54854	7.22462	0.0336367	0			AGR2	10551	EFCAB1	79645	LRRC18	474354	7.22984	8.60743	0
AGR2	10551	KCNE1	3753	DLL4	54567	7.21773	2.98635	0			AGR2	10551	APOL1	8542	FAM83E	54854	7.22462	0.0336367	0
AGR2	10551	CA4	762	ERN2	10595	7.21294	0.730662	0			AGR2	10551	KCNE1	3753	DLL4	54567	7.21773	2.98635	0
AGR2	10551	DYNC2H1	79659	WDR78	79819	7.20612	7.99464	0			AGR2	10551	CA4	762	ERN2	10595	7.21294	0.730662	0
AGR2	10551	CA8	767	ITLN2	142683	7.20241	0	0			AGR2	10551	DYNC2H1	79659	WDR78	79819	7.20612	7.99464	0
AGR2	10551	OSBPL2	9885	SHANK2	22941	7.20058	0	0			AGR2	10551	CA8	767	ITLN2	142683	7.20241	0	0
AGR2	10551	ARMC4	55130	MANEAL	149175	7.18901	0.185301	0			AGR2	10551	OSBPL2	9885	SHANK2	22941	7.20058	0	0
AGR2	10551	ASAH1	427	HIST1H1B	3009	7.18362	0.363963	0			AGR2	10551	ARMC4	55130	MANEAL	149175	7.18901	0.185301	0
AGR2	10551	HMGCS2	3158	PANX2	56666	7.17914	0.194452	0			AGR2	10551	ASAH1	427	HIST1H1B	3009	7.18362	0.363963	0
AGR2	10551	SRM	6723	ITLN2	142683	7.17839	0	0			AGR2	10551	HMGCS2	3158	PANX2	56666	7.17914	0.194452	0
AGR2	10551	WFDC1	58189	RBM25	58517	7.17502	0	0			AGR2	10551	SRM	6723	ITLN2	142683	7.17839	0	0
AGR2	10551	SRM	6723	WFDC1	58189	7.16929	0	0			AGR2	10551	WFDC1	58189	RBM25	58517	7.17502	0	0
AGR2	10551	AGR2	10551	ADCY4	196883	7.16914	0.906084	0			AGR2	10551	SRM	6723	WFDC1	58189	7.16929	0	0
AGR2	10551	WDR78	79819	SPTY2D1	144108	7.16705	0	0			AGR2	10551	AGR2	10551	ADCY4	196883	7.16914	0.906084	0
AGR2	10551	ERN2	10595	ITLN1	55600	7.16498	2.02251	0			AGR2	10551	WDR78	79819	SPTY2D1	144108	7.16705	0	0
AGR2	10551	DBH	1621	PRRG2	5639	7.14263	0	0			AGR2	10551	ERN2	10595	ITLN1	55600	7.16498	2.02251	0
AGR2	10551	P2RY4	5030	AGR2	10551	7.14051	0.202401	0			AGR2	10551	DBH	1621	PRRG2	5639	7.14263	0	0
AGR2	10551	RCC1	1104	HLA-DRB4	3126	7.13934	0	0			AGR2	10551	P2RY4	5030	AGR2	10551	7.14051	0.202401	0
AGR2	10551	PSMD11	5717	ZDHHC18	84243	7.13148	0	0			AGR2	10551	RCC1	1104	HLA-DRB4	3126	7.13934	0	0
AGR2	10551	FCN3	8547	ADCY4	196883	7.1266	0	0			AGR2	10551	PSMD11	5717	ZDHHC18	84243	7.13148	0	0
AGR2	10551	DFFA	1676	MRPS31	10240	7.12425	0	0			AGR2	10551	FCN3	8547	ADCY4	196883	7.1266	0	0
AGR2	10551	NME5	8382	WDR63	126820	7.12161	11.01	0			AGR2	10551	DFFA	1676	MRPS31	10240	7.12425	0	0
AGR2	10551	SPAG6	9576	C9orf26	90865	7.12065	0.23008	0			AGR2	10551	NME5	8382	WDR63	126820	7.12161	11.01	0
AGR2	10551	STX1A	6804	IGSF22	283284	7.12054	0	0			AGR2	10551	SPAG6	9576	C9orf26	90865	7.12065	0.23008	0
AGR2	10551	PKHD1	5314	SLPI	6590	7.1154	0.709909	0			AGR2	10551	STX1A	6804	IGSF22	283284	7.12054	0	0
AGR2	10551	CASP10	843	RAVER2	55225	7.10977	0	0			AGR2	10551	PKHD1	5314	SLPI	6590	7.1154	0.709909	0
AGR2	10551	APOL1	8542	PCDHA3	56145	7.10186	0	0			AGR2	10551	CASP10	843	RAVER2	55225	7.10977	0	0
AGR2	10551	CAPS	828	SPAG6	9576	7.09534	10.8884	0			AGR2	10551	APOL1	8542	PCDHA3	56145	7.10186	0	0
AGR2	10551	MRPS18B	28973	TMOD3	29766	7.09036	0	0			AGR2	10551	CAPS	828	SPAG6	9576	7.09534	10.8884	0
AGR2	10551	RCC1	1104	MANEAL	149175	7.08504	0	0			AGR2	10551	MRPS18B	28973	TMOD3	29766	7.09036	0	0
AGR2	10551	FAM107A	11170	ADCY4	196883	7.07081	0	0			AGR2	10551	RCC1	1104	MANEAL	149175	7.08504	0	0
AGR2	10551	DFFA	1676	XKRX	402415	7.06825	0	0			AGR2	10551	FAM107A	11170	ADCY4	196883	7.07081	0	0
AGR2	10551	SMOX	54498	FAM83E	54854	7.06187	0	0			AGR2	10551	DFFA	1676	XKRX	402415	7.06825	0	0
AGR2	10551	CKB	1152	LPGAT1	9926	7.05994	0.941354	0			AGR2	10551	SMOX	54498	FAM83E	54854	7.06187	0	0
AGR2	10551	PTPRB	5787	VIP	7432	7.05184	3.46884	0			AGR2	10551	CKB	1152	LPGAT1	9926	7.05994	0.941354	0
AGR2	10551	VIP	7432	SPDEF	25803	7.0327	0	0			AGR2	10551	PTPRB	5787	VIP	7432	7.05184	3.46884	0
AGR2	10551	PCDHAC1	56135	C15orf26	161502	7.02534	0	0			AGR2	10551	VIP	7432	SPDEF	25803	7.0327	0	0
AGR2	10551	PRRG2	5639	SPAG6	9576	7.02175	0	0			AGR2	10551	PCDHAC1	56135	C15orf26	161502	7.02534	0	0
AGR2	10551	APOL1	8542	PCDHAC1	56135	7.00861	0.387144	0			AGR2	10551	PRRG2	5639	SPAG6	9576	7.02175	0	0
AGR2	10551	UPB1	51733	ITLN1	55600	7.00559	0	0			AGR2	10551	APOL1	8542	PCDHAC1	56135	7.00861	0.387144	0
AGR2	10551	IER3	8870	WFDC1	58189	6.99953	0	0			AGR2	10551	UPB1	51733	ITLN1	55600	7.00559	0	0
AGR2	10551	ALB	213	CA4	762	6.99205	0	0			AGR2	10551	IER3	8870	WFDC1	58189	6.99953	0	0
AGR2	10551	RPGR	6103	SNRK	54861	6.98537	0.493152	0			AGR2	10551	ALB	213	CA4	762	6.99205	0	0
AGR2	10551	MUC5AC	4586	PTPRB	5787	6.98416	0	0			AGR2	10551	RPGR	6103	SNRK	54861	6.98537	0.493152	0
AGR2	10551	SNRK	54861	WDR78	79819	6.9732	0	0			AGR2	10551	MUC5AC	4586	PTPRB	5787	6.98416	0	0
AGR2	10551	PRRG1	5638	ZDHHC3	51304	6.9725	0	0			AGR2	10551	SNRK	54861	WDR78	79819	6.9732	0	0
AGR2	10551	DBH	1621	WFDC1	58189	6.96455	2.03373	0			AGR2	10551	PRRG1	5638	ZDHHC3	51304	6.9725	0	0
AGR2	10551	DBH	1621	DYNC2H1	79659	6.96369	1.09327	0			AGR2	10551	DBH	1621	WFDC1	58189	6.96455	2.03373	0
AGR2	10551	AGR2	10551	WFDC1	58189	6.96094	0	0			AGR2	10551	DBH	1621	DYNC2H1	79659	6.96369	1.09327	0
AGR2	10551	DLL4	54567	RAVER2	55225	6.94834	0	0			AGR2	10551	AGR2	10551	WFDC1	58189	6.96094	0	0
AGR2	10551	PTPRB	5787	TBX3	6926	6.93993	3.88025	0			AGR2	10551	DLL4	54567	RAVER2	55225	6.94834	0	0
AGR2	10551	MCC	4163	AGR2	10551	6.93932	2.6787	0			AGR2	10551	PTPRB	5787	TBX3	6926	6.93993	3.88025	0
AGR2	10551	MRPS31	10240	RBM25	58517	6.93775	1.43248	0			AGR2	10551	MCC	4163	AGR2	10551	6.93932	2.6787	0
AGR2	10551	ART4	420	STX1A	6804	6.93299	0	0			AGR2	10551	MRPS31	10240	RBM25	58517	6.93775	1.43248	0
AGR2	10551	PSMD2	5708	ATAD2	29028	6.92764	0	0			AGR2	10551	ART4	420	STX1A	6804	6.93299	0	0
AGR2	10551	FOXA3	3171	KIF12	113220	6.91977	1.33899	0			AGR2	10551	PSMD2	5708	ATAD2	29028	6.92764	0	0
AGR2	10551	RCC1	1104	MRPS18B	28973	6.90533	0	0			AGR2	10551	FOXA3	3171	KIF12	113220	6.91977	1.33899	0
AGR2	10551	CA4	762	ITLN1	55600	6.90156	0	0			AGR2	10551	RCC1	1104	MRPS18B	28973	6.90533	0	0
AGR2	10551	CA4	762	FAM107A	11170	6.89777	0	0			AGR2	10551	CA4	762	ITLN1	55600	6.90156	0	0
AGR2	10551	AGR2	10551	ARMC4	55130	6.89442	0	0			AGR2	10551	CA4	762	FAM107A	11170	6.89777	0	0
AGR2	10551	AGR2	10551	SNRK	54861	6.88779	0.354021	0			AGR2	10551	AGR2	10551	ARMC4	55130	6.89442	0	0
AGR2	10551	CASP10	843	PDE5A	8654	6.87877	0	0			AGR2	10551	AGR2	10551	SNRK	54861	6.88779	0.354021	0
AGR2	10551	SRM	6723	PANX2	56666	6.87821	0.0647626	0			AGR2	10551	CASP10	843	PDE5A	8654	6.87877	0	0
AGR2	10551	DOCK5	80005	ADCY4	196883	6.87194	0	0			AGR2	10551	SRM	6723	PANX2	56666	6.87821	0.0647626	0
AGR2	10551	ATAD2	29028	EFCAB1	79645	6.86344	0	0			AGR2	10551	DOCK5	80005	ADCY4	196883	6.87194	0	0
AGR2	10551	FOXA3	3171	YARS	8565	6.85963	0.826193	0			AGR2	10551	ATAD2	29028	EFCAB1	79645	6.86344	0	0
AGR2	10551	ARMC4	55130	KLHL4	56062	6.85336	0.552952	0			AGR2	10551	FOXA3	3171	YARS	8565	6.85963	0.826193	0
AGR2	10551	FOXA3	3171	FCN3	8547	6.85186	0.306099	0			AGR2	10551	ARMC4	55130	KLHL4	56062	6.85336	0.552952	0
AGR2	10551	SPDEF	25803	BAALC	79870	6.84706	0	0			AGR2	10551	FOXA3	3171	FCN3	8547	6.85186	0.306099	0
AGR2	10551	EFCAB1	79645	MGC13040	85016	6.84093	15.1734	0			AGR2	10551	SPDEF	25803	BAALC	79870	6.84706	0	0
AGR2	10551	NME5	8382	ZNF646	9726	6.83666	1.55139	0			AGR2	10551	EFCAB1	79645	MGC13040	85016	6.84093	15.1734	0
AGR2	10551	FCN3	8547	C9orf26	90865	6.83601	0	0			AGR2	10551	NME5	8382	ZNF646	9726	6.83666	1.55139	0
AGR2	10551	GNAT1	2779	PSMD11	5717	6.83222	0	0			AGR2	10551	FCN3	8547	C9orf26	90865	6.83601	0	0
AGR2	10551	MRPS31	10240	MANEAL	149175	6.82058	0	0			AGR2	10551	GNAT1	2779	PSMD11	5717	6.83222	0	0
AGR2	10551	SNRK	54861	XKRX	402415	6.81346	0.98265	0			AGR2	10551	MRPS31	10240	MANEAL	149175	6.82058	0	0
AGR2	10551	ABL1	25	SPAG6	9576	6.81303	0	0			AGR2	10551	SNRK	54861	XKRX	402415	6.81346	0.98265	0
AGR2	10551	AGR2	10551	RNF141	50862	6.81011	0.41584	0			AGR2	10551	ABL1	25	SPAG6	9576	6.81303	0	0
AGR2	10551	WNT11	7481	SNRK	54861	6.80828	0	0			AGR2	10551	AGR2	10551	RNF141	50862	6.81011	0.41584	0
AGR2	10551	PKHD1	5314	APOL2	23780	6.80246	0	0			AGR2	10551	WNT11	7481	SNRK	54861	6.80828	0	0
AGR2	10551	PRRG1	5638	DOCK5	80005	6.8022	1.70768	0			AGR2	10551	PKHD1	5314	APOL2	23780	6.80246	0	0
AGR2	10551	APOL2	23780	TMOD3	29766	6.79622	3.53385	0			AGR2	10551	PRRG1	5638	DOCK5	80005	6.8022	1.70768	0
AGR2	10551	SPAG6	9576	MRPS31	10240	6.79133	5.96697	0			AGR2	10551	APOL2	23780	TMOD3	29766	6.79622	3.53385	0
AGR2	10551	PTPRN2	5799	KIF12	113220	6.79129	2.7608	0			AGR2	10551	SPAG6	9576	MRPS31	10240	6.79133	5.96697	0
AGR2	10551	MBNL1	4154	SLPI	6590	6.78851	1.15619	0			AGR2	10551	PTPRN2	5799	KIF12	113220	6.79129	2.7608	0
AGR2	10551	MBNL1	4154	APOL2	23780	6.78416	0	0			AGR2	10551	MBNL1	4154	SLPI	6590	6.78851	1.15619	0
AGR2	10551	ALB	213	AGR2	10551	6.78167	0	0			AGR2	10551	MBNL1	4154	APOL2	23780	6.78416	0	0
AGR2	10551	AGR2	10551	RNPS1	10921	6.78159	0	0			AGR2	10551	ALB	213	AGR2	10551	6.78167	0	0
AGR2	10551	RBM25	58517	KIF12	113220	6.77554	2.46558	0			AGR2	10551	AGR2	10551	RNPS1	10921	6.78159	0	0
AGR2	10551	PTPRB	5787	FAM83E	54854	6.77312	0	0			AGR2	10551	RBM25	58517	KIF12	113220	6.77554	2.46558	0
AGR2	10551	PRRG1	5638	APOL1	8542	6.76276	1.75927	0			AGR2	10551	PTPRB	5787	FAM83E	54854	6.77312	0	0
AGR2	10551	CASP10	843	TTTY9B	425057	6.76096	0	0			AGR2	10551	PRRG1	5638	APOL1	8542	6.76276	1.75927	0
AGR2	10551	DLL4	54567	OR5B12	390191	6.7607	0.249499	0			AGR2	10551	CASP10	843	TTTY9B	425057	6.76096	0	0
AGR2	10551	CKB	1152	STUB1	10273	6.74729	1.54732	0			AGR2	10551	DLL4	54567	OR5B12	390191	6.7607	0.249499	0
AGR2	10551	ABL1	25	NME5	8382	6.74318	0	0			AGR2	10551	CKB	1152	STUB1	10273	6.74729	1.54732	0
AGR2	10551	P2RY4	5030	CCL25	6370	6.74046	0	0			AGR2	10551	ABL1	25	NME5	8382	6.74318	0	0
AGR2	10551	HSP90AB1	3326	AGR2	10551	6.74032	0	0			AGR2	10551	P2RY4	5030	CCL25	6370	6.74046	0	0
AGR2	10551	PCDHA3	56145	MGC13040	85016	6.73522	0.784141	0			AGR2	10551	HSP90AB1	3326	AGR2	10551	6.74032	0	0
AGR2	10551	DOCK5	80005	C15orf26	161502	6.73479	0	0			AGR2	10551	PCDHA3	56145	MGC13040	85016	6.73522	0.784141	0
AGR2	10551	P2RY4	5030	THSD1	55901	6.72806	0	0			AGR2	10551	DOCK5	80005	C15orf26	161502	6.73479	0	0
AGR2	10551	LPGAT1	9926	ACP6	51205	6.71947	0.604413	0			AGR2	10551	P2RY4	5030	THSD1	55901	6.72806	0	0
AGR2	10551	RCC1	1104	PANX2	56666	6.7178	1.99246	0			AGR2	10551	LPGAT1	9926	ACP6	51205	6.71947	0.604413	0
AGR2	10551	PTPRN2	5799	ITLN1	55600	6.71227	0	0			AGR2	10551	RCC1	1104	PANX2	56666	6.7178	1.99246	0
AGR2	10551	PCDHAC1	56135	HKDC1	80201	6.71125	0	0			AGR2	10551	PTPRN2	5799	ITLN1	55600	6.71227	0	0
AGR2	10551	MUC5AC	4586	FAM83E	54854	6.70218	0	0			AGR2	10551	PCDHAC1	56135	HKDC1	80201	6.71125	0	0
AGR2	10551	CA4	762	SNRK	54861	6.70059	0	0			AGR2	10551	MUC5AC	4586	FAM83E	54854	6.70218	0	0
AGR2	10551	PCDHAC1	56135	WDR78	79819	6.69819	0	0			AGR2	10551	CA4	762	SNRK	54861	6.70059	0	0
AGR2	10551	ERN2	10595	EFCAB1	79645	6.68763	2.2409	0			AGR2	10551	PCDHAC1	56135	WDR78	79819	6.69819	0	0
AGR2	10551	HMGCS2	3158	UPB1	51733	6.67808	3.63885	0			AGR2	10551	ERN2	10595	EFCAB1	79645	6.68763	2.2409	0
AGR2	10551	FAM107A	11170	LRRC18	474354	6.67749	0	0			AGR2	10551	HMGCS2	3158	UPB1	51733	6.67808	3.63885	0
AGR2	10551	MUC5AC	4586	FCN3	8547	6.67326	0.0629897	0			AGR2	10551	FAM107A	11170	LRRC18	474354	6.67749	0	0
AGR2	10551	TMOD3	29766	DOCK5	80005	6.67234	0	0			AGR2	10551	MUC5AC	4586	FCN3	8547	6.67326	0.0629897	0
AGR2	10551	NME5	8382	ZDHHC3	51304	6.66657	0.518039	0			AGR2	10551	TMOD3	29766	DOCK5	80005	6.67234	0	0
AGR2	10551	SPAG6	9576	C6orf201	404220	6.66138	1.27546	0			AGR2	10551	NME5	8382	ZDHHC3	51304	6.66657	0.518039	0
AGR2	10551	MGC13040	85016	C15orf26	161502	6.6498	15.8206	0			AGR2	10551	SPAG6	9576	C6orf201	404220	6.66138	1.27546	0
AGR2	10551	KCNE1	3753	AGR2	10551	6.63987	7.96684	0			AGR2	10551	MGC13040	85016	C15orf26	161502	6.6498	15.8206	0
AGR2	10551	DFFA	1676	C15orf26	161502	6.63192	0	0			AGR2	10551	KCNE1	3753	AGR2	10551	6.63987	7.96684	0
AGR2	10551	PCDHAC1	56135	MGC13040	85016	6.63125	0	0			AGR2	10551	DFFA	1676	C15orf26	161502	6.63192	0	0
AGR2	10551	ID1	3397	MRPS18B	28973	6.63035	0	0			AGR2	10551	PCDHAC1	56135	MGC13040	85016	6.63125	0	0
AGR2	10551	BCHE	590	RAVER2	55225	6.62877	0.0143446	0			AGR2	10551	ID1	3397	MRPS18B	28973	6.63035	0	0
AGR2	10551	MGC11266	79172	MANEAL	149175	6.62536	0	0			AGR2	10551	BCHE	590	RAVER2	55225	6.62877	0.0143446	0
AGR2	10551	STX1A	6804	MGC13040	85016	6.62356	0	0			AGR2	10551	MGC11266	79172	MANEAL	149175	6.62536	0	0
AGR2	10551	ASAH1	427	NME5	8382	6.62188	0.402819	0			AGR2	10551	STX1A	6804	MGC13040	85016	6.62356	0	0
AGR2	10551	ANP32A	8125	ITLN2	142683	6.61952	1.34621	0			AGR2	10551	ASAH1	427	NME5	8382	6.62188	0.402819	0
AGR2	10551	PTPRB	5787	ZDHHC3	51304	6.61756	5.04346	0			AGR2	10551	ANP32A	8125	ITLN2	142683	6.61952	1.34621	0
AGR2	10551	SRM	6723	XKRX	402415	6.60892	0	0			AGR2	10551	PTPRB	5787	ZDHHC3	51304	6.61756	5.04346	0
AGR2	10551	RPGR	6103	CCL25	6370	6.6083	0	0			AGR2	10551	SRM	6723	XKRX	402415	6.60892	0	0
AGR2	10551	MRPS31	10240	RAVER2	55225	6.6046	0	0			AGR2	10551	RPGR	6103	CCL25	6370	6.6083	0	0
AGR2	10551	EFEMP1	2202	SPDEF	25803	6.6038	0	0			AGR2	10551	MRPS31	10240	RAVER2	55225	6.6046	0	0
AGR2	10551	SRM	6723	ITLN1	55600	6.60281	0	0			AGR2	10551	EFEMP1	2202	SPDEF	25803	6.6038	0	0
AGR2	10551	AGR2	10551	C9orf26	90865	6.60271	0	0			AGR2	10551	SRM	6723	ITLN1	55600	6.60281	0	0
AGR2	10551	PRRG2	5639	ADCY4	196883	6.60099	0	0			AGR2	10551	AGR2	10551	C9orf26	90865	6.60271	0	0
AGR2	10551	ID1	3397	WDR78	79819	6.59711	0	0			AGR2	10551	PRRG2	5639	ADCY4	196883	6.60099	0	0
AGR2	10551	HMGCS2	3158	DOCK5	80005	6.59547	0.527963	0			AGR2	10551	ID1	3397	WDR78	79819	6.59711	0	0
AGR2	10551	PTPRB	5787	ITLN2	142683	6.59492	0	0			AGR2	10551	HMGCS2	3158	DOCK5	80005	6.59547	0.527963	0
AGR2	10551	CAPS	828	MANEAL	149175	6.59221	0	0			AGR2	10551	PTPRB	5787	ITLN2	142683	6.59492	0	0
AGR2	10551	DBH	1621	ZNF646	9726	6.58044	0.350868	0			AGR2	10551	CAPS	828	MANEAL	149175	6.59221	0	0
AGR2	10551	APOL2	23780	C15orf26	161502	6.57756	0	0			AGR2	10551	DBH	1621	ZNF646	9726	6.58044	0.350868	0
AGR2	10551	ASAH1	427	AGR2	10551	6.56928	0.199627	0			AGR2	10551	APOL2	23780	C15orf26	161502	6.57756	0	0
AGR2	10551	APOL1	8542	SPTY2D1	144108	6.56856	0	0			AGR2	10551	ASAH1	427	AGR2	10551	6.56928	0.199627	0
AGR2	10551	CKB	1152	YARS	8565	6.56583	0	0			AGR2	10551	APOL1	8542	SPTY2D1	144108	6.56856	0	0
AGR2	10551	PRRG1	5638	ERN2	10595	6.56455	3.81642	0			AGR2	10551	CKB	1152	YARS	8565	6.56583	0	0
AGR2	10551	WNT11	7481	EFCAB1	79645	6.56263	0	0			AGR2	10551	PRRG1	5638	ERN2	10595	6.56455	3.81642	0
AGR2	10551	HSP90AB1	3326	RNPS1	10921	6.55766	1.6313	0			AGR2	10551	WNT11	7481	EFCAB1	79645	6.56263	0	0
AGR2	10551	STX1A	6804	SMOX	54498	6.55371	0	0			AGR2	10551	HSP90AB1	3326	RNPS1	10921	6.55766	1.6313	0
AGR2	10551	PTPRB	5787	SRM	6723	6.54754	0.705271	0			AGR2	10551	STX1A	6804	SMOX	54498	6.55371	0	0
AGR2	10551	NME5	8382	APOL2	23780	6.54745	0	0			AGR2	10551	PTPRB	5787	SRM	6723	6.54754	0.705271	0
AGR2	10551	HIST1H1B	3009	PSMD2	5708	6.54353	0	0			AGR2	10551	NME5	8382	APOL2	23780	6.54745	0	0
AGR2	10551	GNAT1	2779	OR5B12	390191	6.54184	0	0			AGR2	10551	HIST1H1B	3009	PSMD2	5708	6.54353	0	0
AGR2	10551	PSMD11	5717	EXOSC8	11340	6.54089	0	0			AGR2	10551	GNAT1	2779	OR5B12	390191	6.54184	0	0
AGR2	10551	TBX3	6926	C9orf26	90865	6.54084	0.0945277	0			AGR2	10551	PSMD11	5717	EXOSC8	11340	6.54089	0	0
AGR2	10551	PRRG2	5639	SLPI	6590	6.53193	3.96234	0			AGR2	10551	TBX3	6926	C9orf26	90865	6.54084	0.0945277	0
AGR2	10551	S100A3	6274	ERN2	10595	6.52887	0	0			AGR2	10551	PRRG2	5639	SLPI	6590	6.53193	3.96234	0
AGR2	10551	ZDHHC3	51304	WDR63	126820	6.52823	0.828865	0			AGR2	10551	S100A3	6274	ERN2	10595	6.52887	0	0
AGR2	10551	KCNE1	3753	MGC13040	85016	6.52771	7.03321	0			AGR2	10551	ZDHHC3	51304	WDR63	126820	6.52823	0.828865	0
AGR2	10551	AGR2	10551	KLHL4	56062	6.52339	0	0			AGR2	10551	KCNE1	3753	MGC13040	85016	6.52771	7.03321	0
AGR2	10551	REEP5	7905	PCDHA3	56145	6.51869	0.794248	0			AGR2	10551	AGR2	10551	KLHL4	56062	6.52339	0	0
AGR2	10551	RPGR	6103	AGR2	10551	6.51706	0	0			AGR2	10551	REEP5	7905	PCDHA3	56145	6.51869	0.794248	0
AGR2	10551	ID1	3397	EFCAB1	79645	6.51232	0	0			AGR2	10551	RPGR	6103	AGR2	10551	6.51706	0	0
AGR2	10551	ACP6	51205	DYNC2H1	79659	6.50897	0.844588	0			AGR2	10551	ID1	3397	EFCAB1	79645	6.51232	0	0
AGR2	10551	ID1	3397	ZDHHC3	51304	6.50747	0	0			AGR2	10551	ACP6	51205	DYNC2H1	79659	6.50897	0.844588	0
AGR2	10551	MUC5AC	4586	WDR63	126820	6.50295	1.09616	0			AGR2	10551	ID1	3397	ZDHHC3	51304	6.50747	0	0
AGR2	10551	PRRG1	5638	APOL2	23780	6.49706	0	0			AGR2	10551	MUC5AC	4586	WDR63	126820	6.50295	1.09616	0
AGR2	10551	SRM	6723	ERN2	10595	6.49683	0	0			AGR2	10551	PRRG1	5638	APOL2	23780	6.49706	0	0
AGR2	10551	HIST1H1B	3009	SNRK	54861	6.4829	0	0			AGR2	10551	SRM	6723	ERN2	10595	6.49683	0	0
AGR2	10551	BDKRB2	624	SLPI	6590	6.4816	0	0			AGR2	10551	HIST1H1B	3009	SNRK	54861	6.4829	0	0
AGR2	10551	SHANK2	22941	CUEDC2	79004	6.47235	1.60895	0			AGR2	10551	BDKRB2	624	SLPI	6590	6.4816	0	0
AGR2	10551	APOL1	8542	TMOD3	29766	6.46898	0.255822	0			AGR2	10551	SHANK2	22941	CUEDC2	79004	6.47235	1.60895	0
AGR2	10551	NME5	8382	APOL1	8542	6.45698	0	0			AGR2	10551	APOL1	8542	TMOD3	29766	6.46898	0.255822	0
AGR2	10551	APOL1	8542	KIF12	113220	6.45546	0	0			AGR2	10551	NME5	8382	APOL1	8542	6.45698	0	0
AGR2	10551	STUB1	10273	TBC1D24	57465	6.45301	0	0			AGR2	10551	APOL1	8542	KIF12	113220	6.45546	0	0
AGR2	10551	DBH	1621	ERN2	10595	6.44881	0	0			AGR2	10551	STUB1	10273	TBC1D24	57465	6.45301	0	0
AGR2	10551	REEP5	7905	DLL4	54567	6.44761	0	0			AGR2	10551	DBH	1621	ERN2	10595	6.44881	0	0
AGR2	10551	SNRK	54861	RAVER2	55225	6.44753	2.91786	0			AGR2	10551	REEP5	7905	DLL4	54567	6.44761	0	0
AGR2	10551	SNRPA	6626	MGC13040	85016	6.44167	0	0			AGR2	10551	SNRK	54861	RAVER2	55225	6.44753	2.91786	0
AGR2	10551	C9orf26	90865	LRRC18	474354	6.4366	0	0			AGR2	10551	SNRPA	6626	MGC13040	85016	6.44167	0	0
AGR2	10551	VIP	7432	WDR78	79819	6.43468	0	0			AGR2	10551	C9orf26	90865	LRRC18	474354	6.4366	0	0
AGR2	10551	RPGR	6103	MGC13040	85016	6.43323	0.0923635	0			AGR2	10551	VIP	7432	WDR78	79819	6.43468	0	0
AGR2	10551	HMGCS2	3158	EFCAB1	79645	6.43263	1.58021	0			AGR2	10551	RPGR	6103	MGC13040	85016	6.43323	0.0923635	0
AGR2	10551	ID1	3397	VIP	7432	6.42764	0	0			AGR2	10551	HMGCS2	3158	EFCAB1	79645	6.43263	1.58021	0
AGR2	10551	YARS	8565	DOCK5	80005	6.4197	0	0			AGR2	10551	ID1	3397	VIP	7432	6.42764	0	0
AGR2	10551	PDE5A	8654	MMRN2	79812	6.4173	0	0			AGR2	10551	YARS	8565	DOCK5	80005	6.4197	0	0
AGR2	10551	CA4	762	EFCAB1	79645	6.41668	2.22767	0			AGR2	10551	PDE5A	8654	MMRN2	79812	6.4173	0	0
AGR2	10551	KCNK3	3777	RPGR	6103	6.41417	0	0			AGR2	10551	CA4	762	EFCAB1	79645	6.41668	2.22767	0
AGR2	10551	P2RY4	5030	RNPS1	10921	6.41212	0	0			AGR2	10551	KCNK3	3777	RPGR	6103	6.41417	0	0
AGR2	10551	LPGAT1	9926	TBC1D24	57465	6.41134	1.94504	0			AGR2	10551	P2RY4	5030	RNPS1	10921	6.41212	0	0
AGR2	10551	WFDC1	58189	LRRC18	474354	6.41035	0	0			AGR2	10551	LPGAT1	9926	TBC1D24	57465	6.41134	1.94504	0
AGR2	10551	KCNE1	3753	TEK	7010	6.40631	0	0			AGR2	10551	WFDC1	58189	LRRC18	474354	6.41035	0	0
AGR2	10551	ABL1	25	EFCAB1	79645	6.40061	0	0			AGR2	10551	KCNE1	3753	TEK	7010	6.40631	0	0
AGR2	10551	RNPS1	10921	LOC148709	148709	6.39432	0	0			AGR2	10551	ABL1	25	EFCAB1	79645	6.40061	0	0
AGR2	10551	ARMC4	55130	TTTY9B	425057	6.37861	0	0			AGR2	10551	RNPS1	10921	LOC148709	148709	6.39432	0	0
AGR2	10551	NME5	8382	STUB1	10273	6.37823	0	0			AGR2	10551	ARMC4	55130	TTTY9B	425057	6.37861	0	0
AGR2	10551	AGR2	10551	PCDHA3	56145	6.37371	0	0			AGR2	10551	NME5	8382	STUB1	10273	6.37823	0	0
AGR2	10551	KIF12	113220	C15orf26	161502	6.36821	0.0158776	0			AGR2	10551	AGR2	10551	PCDHA3	56145	6.37371	0	0
AGR2	10551	FAM107A	11170	EFCAB1	79645	6.35418	0	0			AGR2	10551	KIF12	113220	C15orf26	161502	6.36821	0.0158776	0
AGR2	10551	WFDC1	58189	ADCY4	196883	6.34895	1.01715	0			AGR2	10551	FAM107A	11170	EFCAB1	79645	6.35418	0	0
AGR2	10551	GMDS	2762	AGR2	10551	6.34454	0	0			AGR2	10551	WFDC1	58189	ADCY4	196883	6.34895	1.01715	0
AGR2	10551	BDKRB2	624	DOCK5	80005	6.33972	0	0			AGR2	10551	GMDS	2762	AGR2	10551	6.34454	0	0
AGR2	10551	KCNE1	3753	OSBPL2	9885	6.33913	0.076533	0			AGR2	10551	BDKRB2	624	DOCK5	80005	6.33972	0	0
AGR2	10551	DYNC2H1	79659	MGC13040	85016	6.33672	3.98717	0			AGR2	10551	KCNE1	3753	OSBPL2	9885	6.33913	0.076533	0
AGR2	10551	REEP5	7905	OR5B12	390191	6.33423	0	0			AGR2	10551	DYNC2H1	79659	MGC13040	85016	6.33672	3.98717	0
AGR2	10551	AGR2	10551	MGC11266	79172	6.33095	1.22793	0			AGR2	10551	REEP5	7905	OR5B12	390191	6.33423	0	0
AGR2	10551	CCL25	6370	RAVER2	55225	6.33004	0	0			AGR2	10551	AGR2	10551	MGC11266	79172	6.33095	1.22793	0
AGR2	10551	PSMD11	5717	TTTY9B	425057	6.32907	1.41574	0			AGR2	10551	CCL25	6370	RAVER2	55225	6.33004	0	0
AGR2	10551	ZDHHC3	51304	PCDHAC1	56135	6.3287	0	0			AGR2	10551	PSMD11	5717	TTTY9B	425057	6.32907	1.41574	0
AGR2	10551	CAPS	828	DOCK5	80005	6.32745	0	0			AGR2	10551	ZDHHC3	51304	PCDHAC1	56135	6.3287	0	0
AGR2	10551	RNPS1	10921	RBM25	58517	6.32708	0.433029	0			AGR2	10551	CAPS	828	DOCK5	80005	6.32745	0	0
AGR2	10551	SPAG6	9576	EXOSC8	11340	6.3265	0.780559	0			AGR2	10551	RNPS1	10921	RBM25	58517	6.32708	0.433029	0
AGR2	10551	PTPRB	5787	UPB1	51733	6.3251	0.234035	0			AGR2	10551	SPAG6	9576	EXOSC8	11340	6.3265	0.780559	0
AGR2	10551	MRPS18B	28973	SMOX	54498	6.32197	0.0484421	0			AGR2	10551	PTPRB	5787	UPB1	51733	6.3251	0.234035	0
AGR2	10551	RPGR	6103	C9orf26	90865	6.31546	0	0			AGR2	10551	MRPS18B	28973	SMOX	54498	6.32197	0.0484421	0
AGR2	10551	BAALC	79870	HKDC1	80201	6.31343	0	0			AGR2	10551	RPGR	6103	C9orf26	90865	6.31546	0	0
AGR2	10551	OSBPL2	9885	DLL4	54567	6.30226	0.320962	0			AGR2	10551	BAALC	79870	HKDC1	80201	6.31343	0	0
AGR2	10551	AGR2	10551	XKRX	402415	6.30113	0	0			AGR2	10551	OSBPL2	9885	DLL4	54567	6.30226	0.320962	0
AGR2	10551	P2RY4	5030	SNRPA	6626	6.29908	0	0			AGR2	10551	AGR2	10551	XKRX	402415	6.30113	0	0
AGR2	10551	RCC1	1104	ERN2	10595	6.29831	0	0			AGR2	10551	P2RY4	5030	SNRPA	6626	6.29908	0	0
AGR2	10551	WNT11	7481	STARD7	56910	6.2965	1.86241	0			AGR2	10551	RCC1	1104	ERN2	10595	6.29831	0	0
AGR2	10551	HMGCS2	3158	ITLN2	142683	6.29251	3.3072	0			AGR2	10551	WNT11	7481	STARD7	56910	6.2965	1.86241	0
AGR2	10551	KCNK3	3777	MMRN2	79812	6.29149	0	0			AGR2	10551	HMGCS2	3158	ITLN2	142683	6.29251	3.3072	0
AGR2	10551	ART4	420	TRAFD1	10906	6.28411	0	0			AGR2	10551	KCNK3	3777	MMRN2	79812	6.29149	0	0
AGR2	10551	RBM25	58517	CUEDC2	79004	6.28105	3.29116	0			AGR2	10551	ART4	420	TRAFD1	10906	6.28411	0	0
AGR2	10551	HIST1H1B	3009	RNF141	50862	6.2797	0	0			AGR2	10551	RBM25	58517	CUEDC2	79004	6.28105	3.29116	0
AGR2	10551	PTPRB	5787	RNF141	50862	6.27967	0	0			AGR2	10551	HIST1H1B	3009	RNF141	50862	6.2797	0	0
AGR2	10551	CKB	1152	EXOSC8	11340	6.26506	5.23679	0			AGR2	10551	PTPRB	5787	RNF141	50862	6.27967	0	0
AGR2	10551	FAM83E	54854	WFDC1	58189	6.26455	0.291872	0			AGR2	10551	CKB	1152	EXOSC8	11340	6.26506	5.23679	0
AGR2	10551	HSP90AB1	3326	ERN2	10595	6.25995	0	0			AGR2	10551	FAM83E	54854	WFDC1	58189	6.26455	0.291872	0
AGR2	10551	FOXA3	3171	WDR63	126820	6.25338	0	0			AGR2	10551	HSP90AB1	3326	ERN2	10595	6.25995	0	0
AGR2	10551	WNT11	7481	KIF12	113220	6.25179	0.223629	0			AGR2	10551	FOXA3	3171	WDR63	126820	6.25338	0	0
AGR2	10551	ZNF646	9726	AGR2	10551	6.24944	0	0			AGR2	10551	WNT11	7481	KIF12	113220	6.25179	0.223629	0
AGR2	10551	RCC1	1104	TRAFD1	10906	6.2481	0.0188649	0			AGR2	10551	ZNF646	9726	AGR2	10551	6.24944	0	0
AGR2	10551	AGR2	10551	PALM2-AKAP2	445815	6.24474	0.121648	0			AGR2	10551	RCC1	1104	TRAFD1	10906	6.2481	0.0188649	0
AGR2	10551	SNRPA	6626	AGR2	10551	6.24078	0.0669819	0			AGR2	10551	AGR2	10551	PALM2-AKAP2	445815	6.24474	0.121648	0
AGR2	10551	SLPI	6590	C15orf26	161502	6.24028	1.56429	0			AGR2	10551	SNRPA	6626	AGR2	10551	6.24078	0.0669819	0
AGR2	10551	STUB1	10273	UPB1	51733	6.239	1.37069	0			AGR2	10551	SLPI	6590	C15orf26	161502	6.24028	1.56429	0
AGR2	10551	PRRG2	5639	SPTY2D1	144108	6.23653	1.55701	0			AGR2	10551	STUB1	10273	UPB1	51733	6.239	1.37069	0
AGR2	10551	YARS	8565	AGR2	10551	6.23629	0	0			AGR2	10551	PRRG2	5639	SPTY2D1	144108	6.23653	1.55701	0
AGR2	10551	RPGR	6103	YARS	8565	6.22191	0	0			AGR2	10551	YARS	8565	AGR2	10551	6.23629	0	0
AGR2	10551	UPB1	51733	PCDHAC1	56135	6.21947	0.440573	0			AGR2	10551	RPGR	6103	YARS	8565	6.22191	0	0
AGR2	10551	RNF141	50862	FAM83E	54854	6.21805	0	0			AGR2	10551	UPB1	51733	PCDHAC1	56135	6.21947	0.440573	0
AGR2	10551	PKHD1	5314	APOL1	8542	6.21248	0.320255	0			AGR2	10551	RNF141	50862	FAM83E	54854	6.21805	0	0
AGR2	10551	HSP90AB1	3326	TMOD3	29766	6.20872	0	0			AGR2	10551	PKHD1	5314	APOL1	8542	6.21248	0.320255	0
AGR2	10551	AGR2	10551	KIF12	113220	6.20748	0	0			AGR2	10551	HSP90AB1	3326	TMOD3	29766	6.20872	0	0
AGR2	10551	YARS	8565	PANX2	56666	6.19962	0	0			AGR2	10551	AGR2	10551	KIF12	113220	6.20748	0	0
AGR2	10551	PTPRN2	5799	SRM	6723	6.19797	0.427121	0			AGR2	10551	YARS	8565	PANX2	56666	6.19962	0	0
AGR2	10551	ADCY4	196883	TTTY9B	425057	6.1966	0	0			AGR2	10551	PTPRN2	5799	SRM	6723	6.19797	0.427121	0
AGR2	10551	CASP10	843	KCNE1	3753	6.19591	0	0			AGR2	10551	ADCY4	196883	TTTY9B	425057	6.1966	0	0
AGR2	10551	CASP10	843	HIST1H1B	3009	6.18938	0	0			AGR2	10551	CASP10	843	KCNE1	3753	6.19591	0	0
AGR2	10551	ABL1	25	LRRC18	474354	6.18447	1.61718	0			AGR2	10551	CASP10	843	HIST1H1B	3009	6.18938	0	0
AGR2	10551	MUC5AC	4586	ZDHHC3	51304	6.18133	0	0			AGR2	10551	ABL1	25	LRRC18	474354	6.18447	1.61718	0
AGR2	10551	NME5	8382	LPGAT1	9926	6.17759	0.481253	0			AGR2	10551	MUC5AC	4586	ZDHHC3	51304	6.18133	0	0
AGR2	10551	BCHE	590	VIP	7432	6.1771	0	0			AGR2	10551	NME5	8382	LPGAT1	9926	6.17759	0.481253	0
AGR2	10551	SNRK	54861	HKDC1	80201	6.17484	0	0			AGR2	10551	BCHE	590	VIP	7432	6.1771	0	0
AGR2	10551	KCNK3	3777	OR5B12	390191	6.17269	0	0			AGR2	10551	SNRK	54861	HKDC1	80201	6.17484	0	0
AGR2	10551	PTPRN2	5799	WNT11	7481	6.17236	0	0			AGR2	10551	KCNK3	3777	OR5B12	390191	6.17269	0	0
AGR2	10551	UGT2B10	7365	DOCK5	80005	6.17017	0	0			AGR2	10551	PTPRN2	5799	WNT11	7481	6.17236	0	0
AGR2	10551	SRM	6723	AGR2	10551	6.16914	0.345127	0			AGR2	10551	UGT2B10	7365	DOCK5	80005	6.17017	0	0
AGR2	10551	ERN2	10595	ADCY4	196883	6.16008	0	0			AGR2	10551	SRM	6723	AGR2	10551	6.16914	0.345127	0
AGR2	10551	HMGCS2	3158	PTPRN2	5799	6.15515	0.25225	0			AGR2	10551	ERN2	10595	ADCY4	196883	6.16008	0	0
AGR2	10551	SHANK2	22941	THSD1	55901	6.15051	0	0			AGR2	10551	HMGCS2	3158	PTPRN2	5799	6.15515	0.25225	0
AGR2	10551	ASAH1	427	PTPRN2	5799	6.14238	0.406232	0			AGR2	10551	SHANK2	22941	THSD1	55901	6.15051	0	0
AGR2	10551	CAPS	828	MGC13040	85016	6.14101	17.9536	0			AGR2	10551	ASAH1	427	PTPRN2	5799	6.14238	0.406232	0
AGR2	10551	REEP5	7905	AGR2	10551	6.13681	0	0			AGR2	10551	CAPS	828	MGC13040	85016	6.14101	17.9536	0
AGR2	10551	AGR2	10551	ITLN2	142683	6.1353	0	0			AGR2	10551	REEP5	7905	AGR2	10551	6.13681	0	0
AGR2	10551	ACP6	51205	TTTY9B	425057	6.13526	0.181648	0			AGR2	10551	AGR2	10551	ITLN2	142683	6.1353	0	0
AGR2	10551	ABL1	25	PTPRN2	5799	6.12869	0	0			AGR2	10551	ACP6	51205	TTTY9B	425057	6.13526	0.181648	0
AGR2	10551	PTPRN2	5799	HKDC1	80201	6.12719	0	0			AGR2	10551	ABL1	25	PTPRN2	5799	6.12869	0	0
AGR2	10551	ATAD2	29028	RAVER2	55225	6.12634	2.132	0			AGR2	10551	PTPRN2	5799	HKDC1	80201	6.12719	0	0
AGR2	10551	SLPI	6590	STX1A	6804	6.12564	2.76239	0			AGR2	10551	ATAD2	29028	RAVER2	55225	6.12634	2.132	0
AGR2	10551	PTPRB	5787	NME5	8382	6.1246	0.841902	0			AGR2	10551	SLPI	6590	STX1A	6804	6.12564	2.76239	0
AGR2	10551	AGR2	10551	SPTY2D1	144108	6.11866	1.59756	0			AGR2	10551	PTPRB	5787	NME5	8382	6.1246	0.841902	0
AGR2	10551	PSMD11	5717	XKRX	402415	6.11722	0	0			AGR2	10551	AGR2	10551	SPTY2D1	144108	6.11866	1.59756	0
AGR2	10551	TMOD3	29766	XKRX	402415	6.1131	0.277899	0			AGR2	10551	PSMD11	5717	XKRX	402415	6.11722	0	0
AGR2	10551	AGR2	10551	RBM25	58517	6.11023	1.05621	0			AGR2	10551	TMOD3	29766	XKRX	402415	6.1131	0.277899	0
AGR2	10551	FAM107A	11170	MMRN2	79812	6.10913	1.09258	0			AGR2	10551	AGR2	10551	RBM25	58517	6.11023	1.05621	0
AGR2	10551	STUB1	10273	RAVER2	55225	6.10715	0.804531	0			AGR2	10551	FAM107A	11170	MMRN2	79812	6.10913	1.09258	0
AGR2	10551	HLA-DRB4	3126	PSMD11	5717	6.10021	0	0			AGR2	10551	STUB1	10273	RAVER2	55225	6.10715	0.804531	0
AGR2	10551	ABL1	25	RPGR	6103	6.09862	0	0			AGR2	10551	HLA-DRB4	3126	PSMD11	5717	6.10021	0	0
AGR2	10551	FCN3	8547	ERN2	10595	6.0951	0.648481	0			AGR2	10551	ABL1	25	RPGR	6103	6.09862	0	0
AGR2	10551	HMGCS2	3158	AGR2	10551	6.09508	0	0			AGR2	10551	FCN3	8547	ERN2	10595	6.0951	0.648481	0
AGR2	10551	FAM83E	54854	EFCAB1	79645	6.0884	0	0			AGR2	10551	HMGCS2	3158	AGR2	10551	6.09508	0	0
AGR2	10551	DBH	1621	DLL4	54567	6.08211	0.014001	0			AGR2	10551	FAM83E	54854	EFCAB1	79645	6.0884	0	0
AGR2	10551	BDKRB2	624	REEP5	7905	6.08162	0	0			AGR2	10551	DBH	1621	DLL4	54567	6.08211	0.014001	0
AGR2	10551	FAM83E	54854	C15orf26	161502	6.0742	0	0			AGR2	10551	BDKRB2	624	REEP5	7905	6.08162	0	0
AGR2	10551	SLPI	6590	SMOX	54498	6.06864	0	0			AGR2	10551	FAM83E	54854	C15orf26	161502	6.0742	0	0
AGR2	10551	FAM83E	54854	WDR63	126820	6.06807	0	0			AGR2	10551	SLPI	6590	SMOX	54498	6.06864	0	0
AGR2	10551	RAVER2	55225	XKRX	402415	6.0566	0	0			AGR2	10551	FAM83E	54854	WDR63	126820	6.06807	0	0
AGR2	10551	FAM83E	54854	XKRX	402415	6.05651	0	0			AGR2	10551	RAVER2	55225	XKRX	402415	6.0566	0	0
AGR2	10551	P2RY4	5030	PRRG1	5638	6.05423	0.0188662	0			AGR2	10551	FAM83E	54854	XKRX	402415	6.05651	0	0
AGR2	10551	DFFA	1676	MUC5AC	4586	6.05131	0.567721	0			AGR2	10551	P2RY4	5030	PRRG1	5638	6.05423	0.0188662	0
AGR2	10551	TBX3	6926	TTTY9B	425057	6.04696	0.289599	0			AGR2	10551	DFFA	1676	MUC5AC	4586	6.05131	0.567721	0
AGR2	10551	KCNK3	3777	EFCAB1	79645	6.0434	0	0			AGR2	10551	TBX3	6926	TTTY9B	425057	6.04696	0.289599	0
AGR2	10551	LOC148709	148709	OR5B12	390191	6.04285	0	0			AGR2	10551	KCNK3	3777	EFCAB1	79645	6.0434	0	0
AGR2	10551	ATAD2	29028	CUEDC2	79004	6.0415	0.0819443	0			AGR2	10551	LOC148709	148709	OR5B12	390191	6.04285	0	0
AGR2	10551	PTPRB	5787	PDE5A	8654	6.03754	1.83309	0			AGR2	10551	ATAD2	29028	CUEDC2	79004	6.0415	0.0819443	0
AGR2	10551	ASAH1	427	REEP5	7905	6.03727	0	0			AGR2	10551	PTPRB	5787	PDE5A	8654	6.03754	1.83309	0
AGR2	10551	PTPRN2	5799	TEK	7010	6.03243	0	0			AGR2	10551	ASAH1	427	REEP5	7905	6.03727	0	0
AGR2	10551	PSAT1	29968	CUEDC2	79004	6.02582	0	0			AGR2	10551	PTPRN2	5799	TEK	7010	6.03243	0	0
AGR2	10551	PRRG1	5638	ACP6	51205	6.01781	0.204324	0			AGR2	10551	PSAT1	29968	CUEDC2	79004	6.02582	0	0
AGR2	10551	S100A3	6274	TBC1D24	57465	6.0146	2.10911	0			AGR2	10551	PRRG1	5638	ACP6	51205	6.01781	0.204324	0
AGR2	10551	HIST1H1B	3009	PTPRN2	5799	6.01112	0	0			AGR2	10551	S100A3	6274	TBC1D24	57465	6.0146	2.10911	0
AGR2	10551	TBX3	6926	THSD1	55901	6.01012	0.991195	0			AGR2	10551	HIST1H1B	3009	PTPRN2	5799	6.01112	0	0
AGR2	10551	ASAH1	427	ITLN2	142683	6.00882	0	0			AGR2	10551	TBX3	6926	THSD1	55901	6.01012	0.991195	0
AGR2	10551	IER3	8870	C15orf26	161502	6.0079	0	0			AGR2	10551	ASAH1	427	ITLN2	142683	6.00882	0	0
AGR2	10551	PSMD2	5708	LOC148709	148709	6.00629	0	0			AGR2	10551	IER3	8870	C15orf26	161502	6.0079	0	0
AGR2	10551	AGR2	10551	APOL2	23780	6.00625	0	0			AGR2	10551	PSMD2	5708	LOC148709	148709	6.00629	0	0
AGR2	10551	UGT2B10	7365	AGR2	10551	6.00202	0	0			AGR2	10551	AGR2	10551	APOL2	23780	6.00625	0	0
AGR2	10551	PSMD11	5717	SRM	6723	6.00059	0	0			AGR2	10551	UGT2B10	7365	AGR2	10551	6.00202	0	0
AGR2	10551	ABL1	25	C9orf26	90865	5.98474	0	0			AGR2	10551	PSMD11	5717	SRM	6723	6.00059	0	0
AGR2	10551	GNAT1	2779	KCNE1	3753	5.9815	0	0			AGR2	10551	ABL1	25	C9orf26	90865	5.98474	0	0
AGR2	10551	ART4	420	POLB	5423	5.97962	0	0			AGR2	10551	GNAT1	2779	KCNE1	3753	5.9815	0	0
AGR2	10551	MANEAL	149175	TTTY9B	425057	5.9794	3.61498	0			AGR2	10551	ART4	420	POLB	5423	5.97962	0	0
AGR2	10551	ABL1	25	ASAH1	427	5.97387	0.849674	0			AGR2	10551	MANEAL	149175	TTTY9B	425057	5.9794	3.61498	0
AGR2	10551	ATAD2	29028	ADCY4	196883	5.96802	0.362579	0			AGR2	10551	ABL1	25	ASAH1	427	5.97387	0.849674	0
AGR2	10551	APOL2	23780	RNF141	50862	5.96654	0	0			AGR2	10551	ATAD2	29028	ADCY4	196883	5.96802	0.362579	0
AGR2	10551	HIST1H1B	3009	KCNE1	3753	5.96653	0	0			AGR2	10551	APOL2	23780	RNF141	50862	5.96654	0	0
AGR2	10551	LOC402221	402221	C6orf201	404220	5.96384	0	0			AGR2	10551	HIST1H1B	3009	KCNE1	3753	5.96653	0	0
AGR2	10551	PTPRB	5787	YARS	8565	5.94878	0	0			AGR2	10551	LOC402221	402221	C6orf201	404220	5.96384	0	0
AGR2	10551	AGR2	10551	STARD7	56910	5.94299	0	0			AGR2	10551	PTPRB	5787	YARS	8565	5.94878	0	0
AGR2	10551	PSMD11	5717	KLHL4	56062	5.94244	0	0			AGR2	10551	AGR2	10551	STARD7	56910	5.94299	0	0
AGR2	10551	AGR2	10551	HKDC1	80201	5.93856	0	0			AGR2	10551	PSMD11	5717	KLHL4	56062	5.94244	0	0
AGR2	10551	P2RY4	5030	APOL1	8542	5.93816	0	0			AGR2	10551	AGR2	10551	HKDC1	80201	5.93856	0	0
AGR2	10551	CA4	762	ANP32A	8125	5.93779	0	0			AGR2	10551	P2RY4	5030	APOL1	8542	5.93816	0	0
AGR2	10551	BCHE	590	ITLN2	142683	5.93762	0	0			AGR2	10551	CA4	762	ANP32A	8125	5.93779	0	0
AGR2	10551	PDE5A	8654	EFCAB1	79645	5.93533	0	0			AGR2	10551	BCHE	590	ITLN2	142683	5.93762	0	0
AGR2	10551	RPGR	6103	TEK	7010	5.93459	0	0			AGR2	10551	PDE5A	8654	EFCAB1	79645	5.93533	0	0
AGR2	10551	PKHD1	5314	SPDEF	25803	5.92508	0	0			AGR2	10551	RPGR	6103	TEK	7010	5.93459	0	0
AGR2	10551	CA4	762	NME5	8382	5.91705	2.71765	0			AGR2	10551	PKHD1	5314	SPDEF	25803	5.92508	0	0
AGR2	10551	MUC5AC	4586	AGR2	10551	5.90738	1.94245	0			AGR2	10551	CA4	762	NME5	8382	5.91705	2.71765	0
AGR2	10551	P2RY4	5030	ZDHHC18	84243	5.89808	0	0			AGR2	10551	MUC5AC	4586	AGR2	10551	5.90738	1.94245	0
AGR2	10551	EFCAB1	79645	KIF12	113220	5.8979	1.07737	0			AGR2	10551	P2RY4	5030	ZDHHC18	84243	5.89808	0	0
AGR2	10551	PKHD1	5314	BAALC	79870	5.89706	0	0			AGR2	10551	EFCAB1	79645	KIF12	113220	5.8979	1.07737	0
AGR2	10551	FOXA3	3171	C15orf26	161502	5.89433	0	0			AGR2	10551	PKHD1	5314	BAALC	79870	5.89706	0	0
AGR2	10551	CKB	1152	STARD7	56910	5.88915	0	0			AGR2	10551	FOXA3	3171	C15orf26	161502	5.89433	0	0
AGR2	10551	BCHE	590	PTPRN2	5799	5.88481	0	0			AGR2	10551	CKB	1152	STARD7	56910	5.88915	0	0
AGR2	10551	WNT11	7481	SPAG6	9576	5.88462	0	0			AGR2	10551	BCHE	590	PTPRN2	5799	5.88481	0	0
AGR2	10551	VIP	7432	DOCK5	80005	5.88016	0	0			AGR2	10551	WNT11	7481	SPAG6	9576	5.88462	0	0
AGR2	10551	ERN2	10595	RAVER2	55225	5.87479	0	0			AGR2	10551	VIP	7432	DOCK5	80005	5.88016	0	0
AGR2	10551	ZNF646	9726	TBC1D24	57465	5.87462	1.14529	0			AGR2	10551	ERN2	10595	RAVER2	55225	5.87479	0	0
AGR2	10551	ECHS1	1892	RNF141	50862	5.87144	0	0			AGR2	10551	ZNF646	9726	TBC1D24	57465	5.87462	1.14529	0
AGR2	10551	FOXA3	3171	KCNE1	3753	5.86818	0	0			AGR2	10551	ECHS1	1892	RNF141	50862	5.87144	0	0
AGR2	10551	BDKRB2	624	MANEAL	149175	5.86771	1.03674	0			AGR2	10551	FOXA3	3171	KCNE1	3753	5.86818	0	0
AGR2	10551	GMDS	2762	HKDC1	80201	5.86512	0	0			AGR2	10551	BDKRB2	624	MANEAL	149175	5.86771	1.03674	0
AGR2	10551	CASP10	843	AGR2	10551	5.86187	2.34852	0			AGR2	10551	GMDS	2762	HKDC1	80201	5.86512	0	0
AGR2	10551	DBH	1621	AGR2	10551	5.86163	0	0			AGR2	10551	CASP10	843	AGR2	10551	5.86187	2.34852	0
AGR2	10551	FOXA3	3171	WFDC1	58189	5.85905	0	0			AGR2	10551	DBH	1621	AGR2	10551	5.86163	0	0
AGR2	10551	EFEMP1	2202	ZDHHC3	51304	5.85202	0.943824	0			AGR2	10551	FOXA3	3171	WFDC1	58189	5.85905	0	0
AGR2	10551	YARS	8565	ZNF646	9726	5.84676	0	0			AGR2	10551	EFEMP1	2202	ZDHHC3	51304	5.85202	0.943824	0
AGR2	10551	OSBPL2	9885	MMRN2	79812	5.84441	3.64954	0			AGR2	10551	YARS	8565	ZNF646	9726	5.84676	0	0
AGR2	10551	HLA-DRB4	3126	AGR2	10551	5.83882	0	0			AGR2	10551	OSBPL2	9885	MMRN2	79812	5.84441	3.64954	0
AGR2	10551	RPGR	6103	OSBPL2	9885	5.83882	0	0			AGR2	10551	HLA-DRB4	3126	AGR2	10551	5.83882	0	0
AGR2	10551	RPGR	6103	NME5	8382	5.83558	0.917615	0			AGR2	10551	RPGR	6103	OSBPL2	9885	5.83882	0	0
AGR2	10551	RAPGEF6	51735	RAVER2	55225	5.83333	0	0			AGR2	10551	RPGR	6103	NME5	8382	5.83558	0.917615	0
AGR2	10551	APOL2	23780	SMOX	54498	5.83332	0	0			AGR2	10551	RAPGEF6	51735	RAVER2	55225	5.83333	0	0
AGR2	10551	DOCK5	80005	WDR63	126820	5.83227	0	0			AGR2	10551	APOL2	23780	SMOX	54498	5.83332	0	0
AGR2	10551	PSMD11	5717	STX1A	6804	5.83125	0	0			AGR2	10551	DOCK5	80005	WDR63	126820	5.83227	0	0
AGR2	10551	HSP90AB1	3326	MRPS31	10240	5.83053	1.34116	0			AGR2	10551	PSMD11	5717	STX1A	6804	5.83125	0	0
AGR2	10551	PSMD2	5708	KIF12	113220	5.82998	1.46871	0			AGR2	10551	HSP90AB1	3326	MRPS31	10240	5.83053	1.34116	0
AGR2	10551	APOL2	23780	PCDHA3	56145	5.8263	0	0			AGR2	10551	PSMD2	5708	KIF12	113220	5.82998	1.46871	0
AGR2	10551	ZNF646	9726	EXOSC8	11340	5.8252	0	0			AGR2	10551	APOL2	23780	PCDHA3	56145	5.8263	0	0
AGR2	10551	TRAFD1	10906	ZDHHC18	84243	5.81845	1.20777	0			AGR2	10551	ZNF646	9726	EXOSC8	11340	5.8252	0	0
AGR2	10551	KCNE1	3753	SLPI	6590	5.81596	0.510731	0			AGR2	10551	TRAFD1	10906	ZDHHC18	84243	5.81845	1.20777	0
AGR2	10551	NME5	8382	C6orf201	404220	5.81324	1.00334	0			AGR2	10551	KCNE1	3753	SLPI	6590	5.81596	0.510731	0
AGR2	10551	KCNE1	3753	NME5	8382	5.81171	4.45706	0			AGR2	10551	NME5	8382	C6orf201	404220	5.81324	1.00334	0
AGR2	10551	BDKRB2	624	DBH	1621	5.81096	0.772704	0			AGR2	10551	KCNE1	3753	NME5	8382	5.81171	4.45706	0
AGR2	10551	UGT2B10	7365	TMOD3	29766	5.80863	0.0580559	0			AGR2	10551	BDKRB2	624	DBH	1621	5.81096	0.772704	0
AGR2	10551	DLL4	54567	C9orf26	90865	5.8055	0	0			AGR2	10551	UGT2B10	7365	TMOD3	29766	5.80863	0.0580559	0
AGR2	10551	AGR2	10551	WDR63	126820	5.80287	0	0			AGR2	10551	DLL4	54567	C9orf26	90865	5.8055	0	0
AGR2	10551	FOXA3	3171	FAM83E	54854	5.8025	0	0			AGR2	10551	AGR2	10551	WDR63	126820	5.80287	0	0
AGR2	10551	SNRK	54861	EFCAB1	79645	5.78927	0	0			AGR2	10551	FOXA3	3171	FAM83E	54854	5.8025	0	0
AGR2	10551	HLA-DRB4	3126	POLB	5423	5.78718	0	0			AGR2	10551	SNRK	54861	EFCAB1	79645	5.78927	0	0
AGR2	10551	HPD	3242	STUB1	10273	5.78516	2.40523	0			AGR2	10551	HLA-DRB4	3126	POLB	5423	5.78718	0	0
AGR2	10551	ID1	3397	TBX3	6926	5.78498	0	0			AGR2	10551	HPD	3242	STUB1	10273	5.78516	2.40523	0
AGR2	10551	AGR2	10551	DYNC2H1	79659	5.78346	5.50946	0			AGR2	10551	ID1	3397	TBX3	6926	5.78498	0	0
AGR2	10551	FCN3	8547	FAM83E	54854	5.78113	0	0			AGR2	10551	AGR2	10551	DYNC2H1	79659	5.78346	5.50946	0
AGR2	10551	TRAFD1	10906	ACP6	51205	5.77938	1.82331	0			AGR2	10551	FCN3	8547	FAM83E	54854	5.78113	0	0
AGR2	10551	PKHD1	5314	REEP5	7905	5.77774	2.81158	0			AGR2	10551	TRAFD1	10906	ACP6	51205	5.77938	1.82331	0
AGR2	10551	EFCAB1	79645	WDR78	79819	5.77641	14.4259	0			AGR2	10551	PKHD1	5314	REEP5	7905	5.77774	2.81158	0
AGR2	10551	MUC5AC	4586	PCDHAC1	56135	5.7733	0	0			AGR2	10551	EFCAB1	79645	WDR78	79819	5.77641	14.4259	0
AGR2	10551	TBX3	6926	DLL4	54567	5.77194	2.44099	0			AGR2	10551	MUC5AC	4586	PCDHAC1	56135	5.7733	0	0
AGR2	10551	CASP10	843	REEP5	7905	5.77155	0	0			AGR2	10551	TBX3	6926	DLL4	54567	5.77194	2.44099	0
AGR2	10551	ART4	420	HPD	3242	5.76973	4.03684	0			AGR2	10551	CASP10	843	REEP5	7905	5.77155	0	0
AGR2	10551	HMGCS2	3158	ADCY4	196883	5.76828	0	0			AGR2	10551	ART4	420	HPD	3242	5.76973	4.03684	0
AGR2	10551	FAM107A	11170	RAVER2	55225	5.76763	0	0			AGR2	10551	HMGCS2	3158	ADCY4	196883	5.76828	0	0
AGR2	10551	RNF141	50862	MMRN2	79812	5.76461	1.95451	0			AGR2	10551	FAM107A	11170	RAVER2	55225	5.76763	0	0
AGR2	10551	EFEMP1	2202	NME5	8382	5.76377	0	0			AGR2	10551	RNF141	50862	MMRN2	79812	5.76461	1.95451	0
AGR2	10551	NME5	8382	YARS	8565	5.76217	0	0			AGR2	10551	EFEMP1	2202	NME5	8382	5.76377	0	0
AGR2	10551	STARD7	56910	RBM25	58517	5.76019	1.65391	0			AGR2	10551	NME5	8382	YARS	8565	5.76217	0	0
AGR2	10551	RBM25	58517	XKRX	402415	5.75946	0	0			AGR2	10551	STARD7	56910	RBM25	58517	5.76019	1.65391	0
AGR2	10551	PSMD2	5708	PSMD11	5717	5.75725	0	0			AGR2	10551	RBM25	58517	XKRX	402415	5.75946	0	0
AGR2	10551	PSAT1	29968	MGC13040	85016	5.75529	0	0			AGR2	10551	PSMD2	5708	PSMD11	5717	5.75725	0	0
AGR2	10551	MUC5AC	4586	UGT2B10	7365	5.7477	0	0			AGR2	10551	PSAT1	29968	MGC13040	85016	5.75529	0	0
AGR2	10551	UPB1	51733	SMOX	54498	5.73294	0.0801906	0			AGR2	10551	MUC5AC	4586	UGT2B10	7365	5.7477	0	0
AGR2	10551	FOXA3	3171	APOL1	8542	5.73153	0	0			AGR2	10551	UPB1	51733	SMOX	54498	5.73294	0.0801906	0
AGR2	10551	VIP	7432	WFDC1	58189	5.72418	0	0			AGR2	10551	FOXA3	3171	APOL1	8542	5.73153	0	0
AGR2	10551	AGR2	10551	BAALC	79870	5.7226	0	0			AGR2	10551	VIP	7432	WFDC1	58189	5.72418	0	0
AGR2	10551	RNF141	50862	SNRK	54861	5.72223	0	0			AGR2	10551	AGR2	10551	BAALC	79870	5.7226	0	0
AGR2	10551	CA4	762	KCNK3	3777	5.71884	0	0			AGR2	10551	RNF141	50862	SNRK	54861	5.72223	0	0
AGR2	10551	EFCAB1	79645	C6orf201	404220	5.71815	1.89688	0			AGR2	10551	CA4	762	KCNK3	3777	5.71884	0	0
AGR2	10551	ID1	3397	TMOD3	29766	5.71799	0.647418	0			AGR2	10551	EFCAB1	79645	C6orf201	404220	5.71815	1.89688	0
AGR2	10551	SPAG6	9576	ITLN2	142683	5.7143	0	0			AGR2	10551	ID1	3397	TMOD3	29766	5.71799	0.647418	0
AGR2	10551	RBM25	58517	LOC402221	402221	5.71305	0.606796	0			AGR2	10551	SPAG6	9576	ITLN2	142683	5.7143	0	0
AGR2	10551	MBNL1	4154	P2RY4	5030	5.71205	0	0			AGR2	10551	RBM25	58517	LOC402221	402221	5.71305	0.606796	0
AGR2	10551	BDKRB2	624	OR5B12	390191	5.71193	0.0146001	0			AGR2	10551	MBNL1	4154	P2RY4	5030	5.71205	0	0
AGR2	10551	MBNL1	4154	TMOD3	29766	5.70702	0	0			AGR2	10551	BDKRB2	624	OR5B12	390191	5.71193	0.0146001	0
AGR2	10551	KCNE1	3753	WFDC1	58189	5.70669	0	0			AGR2	10551	MBNL1	4154	TMOD3	29766	5.70702	0	0
AGR2	10551	DOCK5	80005	MANEAL	149175	5.70666	0.51186	0			AGR2	10551	KCNE1	3753	WFDC1	58189	5.70669	0	0
AGR2	10551	STARD7	56910	LOC402221	402221	5.70572	0	0			AGR2	10551	DOCK5	80005	MANEAL	149175	5.70666	0.51186	0
AGR2	10551	MUC5AC	4586	C15orf26	161502	5.70308	2.43405	0			AGR2	10551	STARD7	56910	LOC402221	402221	5.70572	0	0
AGR2	10551	DBH	1621	SPAG6	9576	5.70087	2.3227	0			AGR2	10551	MUC5AC	4586	C15orf26	161502	5.70308	2.43405	0
AGR2	10551	CCL25	6370	SRM	6723	5.69952	0	0			AGR2	10551	DBH	1621	SPAG6	9576	5.70087	2.3227	0
AGR2	10551	ABL1	25	YARS	8565	5.6982	0	0			AGR2	10551	CCL25	6370	SRM	6723	5.69952	0	0
AGR2	10551	CA4	762	TBX3	6926	5.69687	0	0			AGR2	10551	ABL1	25	YARS	8565	5.6982	0	0
AGR2	10551	APOL1	8542	UPB1	51733	5.69609	0	0			AGR2	10551	CA4	762	TBX3	6926	5.69687	0	0
AGR2	10551	TEK	7010	VIP	7432	5.68682	0	0			AGR2	10551	APOL1	8542	UPB1	51733	5.69609	0	0
AGR2	10551	PCDHA3	56145	WDR78	79819	5.6858	0.0666764	0			AGR2	10551	TEK	7010	VIP	7432	5.68682	0	0
AGR2	10551	APOL2	23780	LOC148709	148709	5.68028	0	0			AGR2	10551	PCDHA3	56145	WDR78	79819	5.6858	0.0666764	0
AGR2	10551	FOXA3	3171	TEK	7010	5.67944	0.124158	0			AGR2	10551	APOL2	23780	LOC148709	148709	5.68028	0	0
AGR2	10551	ABL1	25	ITLN1	55600	5.67204	0	0			AGR2	10551	FOXA3	3171	TEK	7010	5.67944	0.124158	0
AGR2	10551	CA4	762	SPAG6	9576	5.66117	2.46186	0			AGR2	10551	ABL1	25	ITLN1	55600	5.67204	0	0
AGR2	10551	FOXA3	3171	TMOD3	29766	5.65633	0	0			AGR2	10551	CA4	762	SPAG6	9576	5.66117	2.46186	0
AGR2	10551	NME5	8382	KIF12	113220	5.65543	0.695267	0			AGR2	10551	FOXA3	3171	TMOD3	29766	5.65633	0	0
AGR2	10551	APOL1	8542	AGR2	10551	5.65284	0	0			AGR2	10551	NME5	8382	KIF12	113220	5.65543	0.695267	0
AGR2	10551	HLA-DRB4	3126	LPGAT1	9926	5.6524	0	0			AGR2	10551	APOL1	8542	AGR2	10551	5.65284	0	0
AGR2	10551	HLA-DRB4	3126	TRAFD1	10906	5.6485	0	0			AGR2	10551	HLA-DRB4	3126	LPGAT1	9926	5.6524	0	0
AGR2	10551	ABL1	25	SNRK	54861	5.64765	0	0			AGR2	10551	HLA-DRB4	3126	TRAFD1	10906	5.6485	0	0
AGR2	10551	CCL25	6370	SNRPA	6626	5.6448	0	0			AGR2	10551	ABL1	25	SNRK	54861	5.64765	0	0
AGR2	10551	ART4	420	AGR2	10551	5.64338	0	0			AGR2	10551	CCL25	6370	SNRPA	6626	5.6448	0	0
AGR2	10551	OSBPL2	9885	SPTY2D1	144108	5.63921	0.115722	0			AGR2	10551	ART4	420	AGR2	10551	5.64338	0	0
AGR2	10551	TEK	7010	RAVER2	55225	5.63834	3.15919	0			AGR2	10551	OSBPL2	9885	SPTY2D1	144108	5.63921	0.115722	0
AGR2	10551	PRRG2	5639	DLL4	54567	5.6336	0	0			AGR2	10551	TEK	7010	RAVER2	55225	5.63834	3.15919	0
AGR2	10551	ACP6	51205	ITLN2	142683	5.63332	0.877643	0			AGR2	10551	PRRG2	5639	DLL4	54567	5.6336	0	0
AGR2	10551	PDE5A	8654	RBM25	58517	5.63204	4.05919	0			AGR2	10551	ACP6	51205	ITLN2	142683	5.63332	0.877643	0
AGR2	10551	ID1	3397	NME5	8382	5.63058	1.32984	0			AGR2	10551	PDE5A	8654	RBM25	58517	5.63204	4.05919	0
AGR2	10551	APOL1	8542	WDR78	79819	5.62898	0	0			AGR2	10551	ID1	3397	NME5	8382	5.63058	1.32984	0
AGR2	10551	RCC1	1104	MUC5AC	4586	5.62781	0	0			AGR2	10551	APOL1	8542	WDR78	79819	5.62898	0	0
AGR2	10551	PSMD2	5708	ZDHHC18	84243	5.62329	7.38553	0			AGR2	10551	RCC1	1104	MUC5AC	4586	5.62781	0	0
AGR2	10551	ZDHHC3	51304	XKRX	402415	5.62327	0.634378	0			AGR2	10551	PSMD2	5708	ZDHHC18	84243	5.62329	7.38553	0
AGR2	10551	ERN2	10595	WFDC1	58189	5.62261	1.25842	0			AGR2	10551	ZDHHC3	51304	XKRX	402415	5.62327	0.634378	0
AGR2	10551	KCNE1	3753	VIP	7432	5.62143	1.87939	0			AGR2	10551	ERN2	10595	WFDC1	58189	5.62261	1.25842	0
AGR2	10551	HPD	3242	C6orf201	404220	5.61471	0.0211054	0			AGR2	10551	KCNE1	3753	VIP	7432	5.62143	1.87939	0
AGR2	10551	MBNL1	4154	SMOX	54498	5.60764	3.6977	0			AGR2	10551	HPD	3242	C6orf201	404220	5.61471	0.0211054	0
AGR2	10551	POLB	5423	AGR2	10551	5.60759	0	0			AGR2	10551	MBNL1	4154	SMOX	54498	5.60764	3.6977	0
AGR2	10551	C15orf26	161502	ADCY4	196883	5.60591	0.53178	0			AGR2	10551	POLB	5423	AGR2	10551	5.60759	0	0
AGR2	10551	LPGAT1	9926	ITLN2	142683	5.59934	0.793558	0			AGR2	10551	C15orf26	161502	ADCY4	196883	5.60591	0.53178	0
AGR2	10551	UGT2B10	7365	APOL2	23780	5.59816	0	0			AGR2	10551	LPGAT1	9926	ITLN2	142683	5.59934	0.793558	0
AGR2	10551	BDKRB2	624	SPAG6	9576	5.59623	0	0			AGR2	10551	UGT2B10	7365	APOL2	23780	5.59816	0	0
AGR2	10551	MMRN2	79812	LRRC18	474354	5.59246	0.135619	0			AGR2	10551	BDKRB2	624	SPAG6	9576	5.59623	0	0
AGR2	10551	BCHE	590	LRRC18	474354	5.59078	0	0			AGR2	10551	MMRN2	79812	LRRC18	474354	5.59246	0.135619	0
AGR2	10551	SRM	6723	WDR63	126820	5.58936	0	0			AGR2	10551	BCHE	590	LRRC18	474354	5.59078	0	0
AGR2	10551	ZNF646	9726	MRPS31	10240	5.58381	3.57334	0			AGR2	10551	SRM	6723	WDR63	126820	5.58936	0	0
AGR2	10551	MCC	4163	NME5	8382	5.57862	1.19893	0			AGR2	10551	ZNF646	9726	MRPS31	10240	5.58381	3.57334	0
AGR2	10551	SLPI	6590	PANX2	56666	5.57714	3.54549	0			AGR2	10551	MCC	4163	NME5	8382	5.57862	1.19893	0
AGR2	10551	FOXA3	3171	RPGR	6103	5.5756	0.125945	0			AGR2	10551	SLPI	6590	PANX2	56666	5.57714	3.54549	0
AGR2	10551	ID1	3397	PANX2	56666	5.56998	0	0			AGR2	10551	FOXA3	3171	RPGR	6103	5.5756	0.125945	0
AGR2	10551	SPAG6	9576	C15orf26	161502	5.5674	12.841	0			AGR2	10551	ID1	3397	PANX2	56666	5.56998	0	0
AGR2	10551	PDE5A	8654	XKRX	402415	5.56587	0	0			AGR2	10551	SPAG6	9576	C15orf26	161502	5.5674	12.841	0
AGR2	10551	PRRG2	5639	RNF141	50862	5.56028	0	0			AGR2	10551	PDE5A	8654	XKRX	402415	5.56587	0	0
AGR2	10551	WNT11	7481	FAM107A	11170	5.55982	3.67717	0			AGR2	10551	PRRG2	5639	RNF141	50862	5.56028	0	0
AGR2	10551	AGR2	10551	PANX2	56666	5.55852	0.508596	0			AGR2	10551	WNT11	7481	FAM107A	11170	5.55982	3.67717	0
AGR2	10551	CA8	767	ECHS1	1892	5.55814	0	0			AGR2	10551	AGR2	10551	PANX2	56666	5.55852	0.508596	0
AGR2	10551	PCDHAC1	56135	EFCAB1	79645	5.55654	0	0			AGR2	10551	CA8	767	ECHS1	1892	5.55814	0	0
AGR2	10551	ATAD2	29028	C6orf201	404220	5.55413	0	0			AGR2	10551	PCDHAC1	56135	EFCAB1	79645	5.55654	0	0
AGR2	10551	IER3	8870	TMOD3	29766	5.55328	0.938631	0			AGR2	10551	ATAD2	29028	C6orf201	404220	5.55413	0	0
AGR2	10551	APOL1	8542	DOCK5	80005	5.55156	0	0			AGR2	10551	IER3	8870	TMOD3	29766	5.55328	0.938631	0
AGR2	10551	YARS	8565	C9orf26	90865	5.55056	0	0			AGR2	10551	APOL1	8542	DOCK5	80005	5.55156	0	0
AGR2	10551	KCNE1	3753	SNRPA	6626	5.54586	0	0			AGR2	10551	YARS	8565	C9orf26	90865	5.55056	0	0
AGR2	10551	SRM	6723	SHANK2	22941	5.54011	0.980671	0			AGR2	10551	KCNE1	3753	SNRPA	6626	5.54586	0	0
AGR2	10551	WNT11	7481	DOCK5	80005	5.53858	0	0			AGR2	10551	SRM	6723	SHANK2	22941	5.54011	0.980671	0
AGR2	10551	IER3	8870	DYNC2H1	79659	5.53801	0	0			AGR2	10551	WNT11	7481	DOCK5	80005	5.53858	0	0
AGR2	10551	FOXA3	3171	HKDC1	80201	5.5369	0.093544	0			AGR2	10551	IER3	8870	DYNC2H1	79659	5.53801	0	0
AGR2	10551	CASP10	843	KIF12	113220	5.53687	0.584847	0			AGR2	10551	FOXA3	3171	HKDC1	80201	5.5369	0.093544	0
AGR2	10551	PRRG1	5638	C15orf26	161502	5.53602	0.85367	0			AGR2	10551	CASP10	843	KIF12	113220	5.53687	0.584847	0
AGR2	10551	SRM	6723	PDE5A	8654	5.53146	3.40009	0			AGR2	10551	PRRG1	5638	C15orf26	161502	5.53602	0.85367	0
AGR2	10551	VIP	7432	RAVER2	55225	5.52884	1.95457	0			AGR2	10551	SRM	6723	PDE5A	8654	5.53146	3.40009	0
AGR2	10551	AGR2	10551	TRAFD1	10906	5.52757	0	0			AGR2	10551	VIP	7432	RAVER2	55225	5.52884	1.95457	0
AGR2	10551	BDKRB2	624	AGR2	10551	5.52629	1.14976	0			AGR2	10551	AGR2	10551	TRAFD1	10906	5.52757	0	0
AGR2	10551	PTPRB	5787	RPGR	6103	5.52385	0	0			AGR2	10551	BDKRB2	624	AGR2	10551	5.52629	1.14976	0
AGR2	10551	UPB1	51733	XKRX	402415	5.52331	1.60349	0			AGR2	10551	PTPRB	5787	RPGR	6103	5.52385	0	0
AGR2	10551	BDKRB2	624	TTTY9B	425057	5.51858	1.26851	0			AGR2	10551	UPB1	51733	XKRX	402415	5.52331	1.60349	0
AGR2	10551	S100A3	6274	NME5	8382	5.51833	0	0			AGR2	10551	BDKRB2	624	TTTY9B	425057	5.51858	1.26851	0
AGR2	10551	TMOD3	29766	UPB1	51733	5.51811	2.18397	0			AGR2	10551	S100A3	6274	NME5	8382	5.51833	0	0
AGR2	10551	FOXA3	3171	SNRK	54861	5.51736	3.24456	0			AGR2	10551	TMOD3	29766	UPB1	51733	5.51811	2.18397	0
AGR2	10551	ZDHHC18	84243	ADCY4	196883	5.51519	0	0			AGR2	10551	FOXA3	3171	SNRK	54861	5.51736	3.24456	0
AGR2	10551	PTPRN2	5799	RNPS1	10921	5.51295	0.418838	0			AGR2	10551	ZDHHC18	84243	ADCY4	196883	5.51519	0	0
AGR2	10551	DOCK5	80005	KIF12	113220	5.51074	0	0			AGR2	10551	PTPRN2	5799	RNPS1	10921	5.51295	0.418838	0
AGR2	10551	PTPRN2	5799	TBX3	6926	5.50963	0	0			AGR2	10551	DOCK5	80005	KIF12	113220	5.51074	0	0
AGR2	10551	BCHE	590	AGR2	10551	5.50847	0	0			AGR2	10551	PTPRN2	5799	TBX3	6926	5.50963	0	0
AGR2	10551	CA4	762	SRM	6723	5.50596	0	0			AGR2	10551	BCHE	590	AGR2	10551	5.50847	0	0
AGR2	10551	ASAH1	427	ZNF646	9726	5.50441	0.355693	0			AGR2	10551	CA4	762	SRM	6723	5.50596	0	0
AGR2	10551	RBM25	58517	C6orf201	404220	5.50104	0	0			AGR2	10551	ASAH1	427	ZNF646	9726	5.50441	0.355693	0
AGR2	10551	FAM83E	54854	SNRK	54861	5.49636	0	0			AGR2	10551	RBM25	58517	C6orf201	404220	5.50104	0	0
AGR2	10551	KCNK3	3777	WFDC1	58189	5.4956	0	0			AGR2	10551	FAM83E	54854	SNRK	54861	5.49636	0	0
AGR2	10551	OSBPL2	9885	FAM83E	54854	5.49449	0	0			AGR2	10551	KCNK3	3777	WFDC1	58189	5.4956	0	0
AGR2	10551	FOXA3	3171	S100A3	6274	5.49247	0.615067	0			AGR2	10551	OSBPL2	9885	FAM83E	54854	5.49449	0	0
AGR2	10551	PTPRN2	5799	FCN3	8547	5.4923	0	0			AGR2	10551	FOXA3	3171	S100A3	6274	5.49247	0.615067	0
AGR2	10551	CKB	1152	WDR78	79819	5.49073	0.19579	0			AGR2	10551	PTPRN2	5799	FCN3	8547	5.4923	0	0
AGR2	10551	STX1A	6804	KLHL4	56062	5.48593	0.309832	0			AGR2	10551	CKB	1152	WDR78	79819	5.49073	0.19579	0
AGR2	10551	WNT11	7481	OR5B12	390191	5.48454	0	0			AGR2	10551	STX1A	6804	KLHL4	56062	5.48593	0.309832	0
AGR2	10551	STX1A	6804	PCDHA3	56145	5.48166	0.0752121	0			AGR2	10551	WNT11	7481	OR5B12	390191	5.48454	0	0
AGR2	10551	DBH	1621	EFCAB1	79645	5.47905	1.88502	0			AGR2	10551	STX1A	6804	PCDHA3	56145	5.48166	0.0752121	0
AGR2	10551	ITLN1	55600	C9orf26	90865	5.47798	0.596513	0			AGR2	10551	DBH	1621	EFCAB1	79645	5.47905	1.88502	0
AGR2	10551	ATAD2	29028	DOCK5	80005	5.47476	2.16279	0			AGR2	10551	ITLN1	55600	C9orf26	90865	5.47798	0.596513	0
AGR2	10551	GNAT1	2779	AGR2	10551	5.46545	0	0			AGR2	10551	ATAD2	29028	DOCK5	80005	5.47476	2.16279	0
AGR2	10551	DOCK5	80005	TTTY9B	425057	5.46172	0	0			AGR2	10551	GNAT1	2779	AGR2	10551	5.46545	0	0
AGR2	10551	HSP90AB1	3326	YARS	8565	5.45975	0.204903	0			AGR2	10551	DOCK5	80005	TTTY9B	425057	5.46172	0	0
AGR2	10551	PTPRB	5787	PANX2	56666	5.45568	0	0			AGR2	10551	HSP90AB1	3326	YARS	8565	5.45975	0.204903	0
AGR2	10551	RPGR	6103	THSD1	55901	5.45472	0.445325	0			AGR2	10551	PTPRB	5787	PANX2	56666	5.45568	0	0
AGR2	10551	RCC1	1104	STX1A	6804	5.45434	2.92756	0			AGR2	10551	RPGR	6103	THSD1	55901	5.45472	0.445325	0
AGR2	10551	CA4	762	EFEMP1	2202	5.45171	0	0			AGR2	10551	RCC1	1104	STX1A	6804	5.45434	2.92756	0
AGR2	10551	AGR2	10551	C6orf201	404220	5.45042	1.51804	0			AGR2	10551	CA4	762	EFEMP1	2202	5.45171	0	0
AGR2	10551	IER3	8870	AGR2	10551	5.44863	0	0			AGR2	10551	AGR2	10551	C6orf201	404220	5.45042	1.51804	0
AGR2	10551	DBH	1621	SNRK	54861	5.4446	0	0			AGR2	10551	IER3	8870	AGR2	10551	5.44863	0	0
AGR2	10551	LPGAT1	9926	WDR78	79819	5.44337	0	0			AGR2	10551	DBH	1621	SNRK	54861	5.4446	0	0
AGR2	10551	GNAT1	2779	P2RY4	5030	5.44006	0.329008	0			AGR2	10551	LPGAT1	9926	WDR78	79819	5.44337	0	0
AGR2	10551	ANP32A	8125	AGR2	10551	5.43936	0	0			AGR2	10551	GNAT1	2779	P2RY4	5030	5.44006	0.329008	0
AGR2	10551	MUC5AC	4586	VIP	7432	5.43792	0	0			AGR2	10551	ANP32A	8125	AGR2	10551	5.43936	0	0
AGR2	10551	RPGR	6103	ANP32A	8125	5.43656	0	0			AGR2	10551	MUC5AC	4586	VIP	7432	5.43792	0	0
AGR2	10551	CKB	1152	SLPI	6590	5.43191	4.82696	0			AGR2	10551	RPGR	6103	ANP32A	8125	5.43656	0	0
AGR2	10551	SRM	6723	FAM83E	54854	5.43131	0	0			AGR2	10551	CKB	1152	SLPI	6590	5.43191	4.82696	0
AGR2	10551	S100A3	6274	IGSF22	283284	5.43123	0	0			AGR2	10551	SRM	6723	FAM83E	54854	5.43131	0	0
AGR2	10551	MRPS31	10240	ADCY4	196883	5.42944	0	0			AGR2	10551	S100A3	6274	IGSF22	283284	5.43123	0	0
AGR2	10551	MBNL1	4154	APOL1	8542	5.42761	0	0			AGR2	10551	MRPS31	10240	ADCY4	196883	5.42944	0	0
AGR2	10551	PSAT1	29968	FAM83E	54854	5.42371	0.511233	0			AGR2	10551	MBNL1	4154	APOL1	8542	5.42761	0	0
AGR2	10551	WDR63	126820	C6orf201	404220	5.4229	2.5508	0			AGR2	10551	PSAT1	29968	FAM83E	54854	5.42371	0.511233	0
AGR2	10551	FAM83E	54854	PANX2	56666	5.42272	0.130484	0			AGR2	10551	WDR63	126820	C6orf201	404220	5.4229	2.5508	0
AGR2	10551	NME5	8382	SNRK	54861	5.42056	0	0			AGR2	10551	FAM83E	54854	PANX2	56666	5.42272	0.130484	0
AGR2	10551	HIST1H1B	3009	C6orf201	404220	5.41945	0	0			AGR2	10551	NME5	8382	SNRK	54861	5.42056	0	0
AGR2	10551	UGT2B10	7365	EFCAB1	79645	5.40927	0	0			AGR2	10551	HIST1H1B	3009	C6orf201	404220	5.41945	0	0
AGR2	10551	ASAH1	427	TBX3	6926	5.40541	0.511315	0			AGR2	10551	UGT2B10	7365	EFCAB1	79645	5.40927	0	0
AGR2	10551	CA4	762	YARS	8565	5.40431	0	0			AGR2	10551	ASAH1	427	TBX3	6926	5.40541	0.511315	0
AGR2	10551	BCHE	590	CASP10	843	5.40342	0	0			AGR2	10551	CA4	762	YARS	8565	5.40431	0	0
AGR2	10551	KCNE1	3753	PDE5A	8654	5.40297	0	0			AGR2	10551	BCHE	590	CASP10	843	5.40342	0	0
AGR2	10551	AGR2	10551	MGC13040	85016	5.40202	1.43559	0			AGR2	10551	KCNE1	3753	PDE5A	8654	5.40297	0	0
AGR2	10551	SPDEF	25803	IGSF22	283284	5.39809	0	0			AGR2	10551	AGR2	10551	MGC13040	85016	5.40202	1.43559	0
AGR2	10551	MRPS31	10240	C6orf201	404220	5.398	0	0			AGR2	10551	SPDEF	25803	IGSF22	283284	5.39809	0	0
AGR2	10551	UGT2B10	7365	UPB1	51733	5.39475	0	0			AGR2	10551	MRPS31	10240	C6orf201	404220	5.398	0	0
AGR2	10551	SLPI	6590	EFCAB1	79645	5.3907	0	0			AGR2	10551	UGT2B10	7365	UPB1	51733	5.39475	0	0
AGR2	10551	FCN3	8547	DOCK5	80005	5.3891	0	0			AGR2	10551	SLPI	6590	EFCAB1	79645	5.3907	0	0
AGR2	10551	HIST1H1B	3009	SHANK2	22941	5.38879	0	0			AGR2	10551	FCN3	8547	DOCK5	80005	5.3891	0	0
AGR2	10551	DLL4	54567	EFCAB1	79645	5.38489	4.59728	0			AGR2	10551	HIST1H1B	3009	SHANK2	22941	5.38879	0	0
AGR2	10551	THSD1	55901	C9orf26	90865	5.38296	3.27391	0			AGR2	10551	DLL4	54567	EFCAB1	79645	5.38489	4.59728	0
AGR2	10551	BDKRB2	624	SRM	6723	5.38116	0	0			AGR2	10551	THSD1	55901	C9orf26	90865	5.38296	3.27391	0
AGR2	10551	KIF12	113220	C6orf201	404220	5.3777	0.861264	0			AGR2	10551	BDKRB2	624	SRM	6723	5.38116	0	0
AGR2	10551	AGR2	10551	DLL4	54567	5.37742	3.51547	0			AGR2	10551	KIF12	113220	C6orf201	404220	5.3777	0.861264	0
AGR2	10551	RAVER2	55225	EFCAB1	79645	5.37681	0	0			AGR2	10551	AGR2	10551	DLL4	54567	5.37742	3.51547	0
AGR2	10551	SPAG6	9576	ADCY4	196883	5.37469	0.407726	0			AGR2	10551	RAVER2	55225	EFCAB1	79645	5.37681	0	0
AGR2	10551	TEK	7010	ERN2	10595	5.37382	3.1565	0			AGR2	10551	SPAG6	9576	ADCY4	196883	5.37469	0.407726	0
AGR2	10551	RAPGEF6	51735	PALM2-AKAP2	445815	5.36951	0	0			AGR2	10551	TEK	7010	ERN2	10595	5.37382	3.1565	0
AGR2	10551	WFDC1	58189	C6orf201	404220	5.3689	2.88679	0			AGR2	10551	RAPGEF6	51735	PALM2-AKAP2	445815	5.36951	0	0
AGR2	10551	REEP5	7905	THSD1	55901	5.36828	0	0			AGR2	10551	WFDC1	58189	C6orf201	404220	5.3689	2.88679	0
AGR2	10551	PRRG2	5639	FAM83E	54854	5.36364	1.56685	0			AGR2	10551	REEP5	7905	THSD1	55901	5.36828	0	0
AGR2	10551	RAVER2	55225	OR5B12	390191	5.35733	0	0			AGR2	10551	PRRG2	5639	FAM83E	54854	5.36364	1.56685	0
AGR2	10551	WNT11	7481	AGR2	10551	5.3565	0.941897	0			AGR2	10551	RAVER2	55225	OR5B12	390191	5.35733	0	0
AGR2	10551	ECHS1	1892	C6orf201	404220	5.35589	0	0			AGR2	10551	WNT11	7481	AGR2	10551	5.3565	0.941897	0
AGR2	10551	KCNE1	3753	LOC148709	148709	5.35525	0.098005	0			AGR2	10551	ECHS1	1892	C6orf201	404220	5.35589	0	0
AGR2	10551	CUEDC2	79004	MGC11266	79172	5.35316	0	0			AGR2	10551	KCNE1	3753	LOC148709	148709	5.35525	0.098005	0
AGR2	10551	HSP90AB1	3326	STARD7	56910	5.35141	0	0			AGR2	10551	CUEDC2	79004	MGC11266	79172	5.35316	0	0
AGR2	10551	GNAT1	2779	SLPI	6590	5.35046	0	0			AGR2	10551	HSP90AB1	3326	STARD7	56910	5.35141	0	0
AGR2	10551	PTPRN2	5799	ERN2	10595	5.34968	0	0			AGR2	10551	GNAT1	2779	SLPI	6590	5.35046	0	0
AGR2	10551	ID1	3397	TEK	7010	5.34861	0	0			AGR2	10551	PTPRN2	5799	ERN2	10595	5.34968	0	0
AGR2	10551	MCC	4163	FAM83E	54854	5.34774	0	0			AGR2	10551	ID1	3397	TEK	7010	5.34861	0	0
AGR2	10551	CKB	1152	RNPS1	10921	5.34732	0.0150253	0			AGR2	10551	MCC	4163	FAM83E	54854	5.34774	0	0
AGR2	10551	NME5	8382	HKDC1	80201	5.34656	0.0215793	0			AGR2	10551	CKB	1152	RNPS1	10921	5.34732	0.0150253	0
AGR2	10551	CKB	1152	FOXA3	3171	5.34452	0	0			AGR2	10551	NME5	8382	HKDC1	80201	5.34656	0.0215793	0
AGR2	10551	SNRK	54861	WDR63	126820	5.34258	0	0			AGR2	10551	CKB	1152	FOXA3	3171	5.34452	0	0
AGR2	10551	RCC1	1104	SLPI	6590	5.34232	0	0			AGR2	10551	SNRK	54861	WDR63	126820	5.34258	0	0
AGR2	10551	HIST1H1B	3009	EFCAB1	79645	5.33332	1.27183	0			AGR2	10551	RCC1	1104	SLPI	6590	5.34232	0	0
AGR2	10551	MUC5AC	4586	S100A3	6274	5.32733	0.220317	0			AGR2	10551	HIST1H1B	3009	EFCAB1	79645	5.33332	1.27183	0
AGR2	10551	ABL1	25	FOXA3	3171	5.3202	0	0			AGR2	10551	MUC5AC	4586	S100A3	6274	5.32733	0.220317	0
AGR2	10551	TBX3	6926	ARMC4	55130	5.31547	0	0			AGR2	10551	ABL1	25	FOXA3	3171	5.3202	0	0
AGR2	10551	PRRG1	5638	REEP5	7905	5.31449	2.69609	0			AGR2	10551	TBX3	6926	ARMC4	55130	5.31547	0	0
AGR2	10551	TEK	7010	ITLN2	142683	5.31422	0	0			AGR2	10551	PRRG1	5638	REEP5	7905	5.31449	2.69609	0
AGR2	10551	ANP32A	8125	MGC11266	79172	5.30909	0.464023	0			AGR2	10551	TEK	7010	ITLN2	142683	5.31422	0	0
AGR2	10551	VIP	7432	WDR63	126820	5.30862	0	0			AGR2	10551	ANP32A	8125	MGC11266	79172	5.30909	0.464023	0
AGR2	10551	PSAT1	29968	HKDC1	80201	5.30714	1.07068	0			AGR2	10551	VIP	7432	WDR63	126820	5.30862	0	0
AGR2	10551	WFDC1	58189	OR5B12	390191	5.30279	2.09397	0			AGR2	10551	PSAT1	29968	HKDC1	80201	5.30714	1.07068	0
AGR2	10551	ABL1	25	RCC1	1104	5.30248	0.252083	0			AGR2	10551	WFDC1	58189	OR5B12	390191	5.30279	2.09397	0
AGR2	10551	DFFA	1676	FAM83E	54854	5.29549	0	0			AGR2	10551	ABL1	25	RCC1	1104	5.30248	0.252083	0
AGR2	10551	STX1A	6804	LOC148709	148709	5.29273	0	0			AGR2	10551	DFFA	1676	FAM83E	54854	5.29549	0	0
AGR2	10551	PTPRN2	5799	WDR78	79819	5.29121	0	0			AGR2	10551	STX1A	6804	LOC148709	148709	5.29273	0	0
AGR2	10551	CA8	767	AGR2	10551	5.28894	0	0			AGR2	10551	PTPRN2	5799	WDR78	79819	5.29121	0	0
AGR2	10551	POLB	5423	MANEAL	149175	5.28608	0	0			AGR2	10551	CA8	767	AGR2	10551	5.28894	0	0
AGR2	10551	PSMD2	5708	STUB1	10273	5.27811	2.30357	0			AGR2	10551	POLB	5423	MANEAL	149175	5.28608	0	0
AGR2	10551	ALB	213	STX1A	6804	5.27563	0	0			AGR2	10551	PSMD2	5708	STUB1	10273	5.27811	2.30357	0
AGR2	10551	EFCAB1	79645	TTTY9B	425057	5.27555	0	0			AGR2	10551	ALB	213	STX1A	6804	5.27563	0	0
AGR2	10551	RAVER2	55225	THSD1	55901	5.26869	0	0			AGR2	10551	EFCAB1	79645	TTTY9B	425057	5.27555	0	0
AGR2	10551	HIST1H1B	3009	UPB1	51733	5.26812	0	0			AGR2	10551	RAVER2	55225	THSD1	55901	5.26869	0	0
AGR2	10551	MBNL1	4154	AGR2	10551	5.26618	0.131232	0			AGR2	10551	HIST1H1B	3009	UPB1	51733	5.26812	0	0
AGR2	10551	FAM83E	54854	OR5B12	390191	5.26604	0	0			AGR2	10551	MBNL1	4154	AGR2	10551	5.26618	0.131232	0
AGR2	10551	BDKRB2	624	XKRX	402415	5.25885	0	0			AGR2	10551	FAM83E	54854	OR5B12	390191	5.26604	0	0
AGR2	10551	KLHL4	56062	C15orf26	161502	5.2582	0	0			AGR2	10551	BDKRB2	624	XKRX	402415	5.25885	0	0
AGR2	10551	KCNK3	3777	LRRC18	474354	5.25711	0	0			AGR2	10551	KLHL4	56062	C15orf26	161502	5.2582	0	0
AGR2	10551	VIP	7432	APOL2	23780	5.25384	6.86707	0			AGR2	10551	KCNK3	3777	LRRC18	474354	5.25711	0	0
AGR2	10551	NME5	8382	PSAT1	29968	5.24963	0	0			AGR2	10551	VIP	7432	APOL2	23780	5.25384	6.86707	0
AGR2	10551	PKHD1	5314	OSBPL2	9885	5.24961	0	0			AGR2	10551	NME5	8382	PSAT1	29968	5.24963	0	0
AGR2	10551	OSBPL2	9885	THSD1	55901	5.24893	0	0			AGR2	10551	PKHD1	5314	OSBPL2	9885	5.24961	0	0
AGR2	10551	SHANK2	22941	RNF141	50862	5.24856	0	0			AGR2	10551	OSBPL2	9885	THSD1	55901	5.24893	0	0
AGR2	10551	CCL25	6370	TBX3	6926	5.24844	0	0			AGR2	10551	SHANK2	22941	RNF141	50862	5.24856	0	0
AGR2	10551	PSMD2	5708	STARD7	56910	5.24787	0	0			AGR2	10551	CCL25	6370	TBX3	6926	5.24844	0	0
AGR2	10551	BDKRB2	624	PRRG1	5638	5.24346	0	0			AGR2	10551	PSMD2	5708	STARD7	56910	5.24787	0	0
AGR2	10551	HIST1H1B	3009	OSBPL2	9885	5.23938	0.0379252	0			AGR2	10551	BDKRB2	624	PRRG1	5638	5.24346	0	0
AGR2	10551	RCC1	1104	ATAD2	29028	5.2387	0	0			AGR2	10551	HIST1H1B	3009	OSBPL2	9885	5.23938	0.0379252	0
AGR2	10551	NME5	8382	ACP6	51205	5.2333	0	0			AGR2	10551	RCC1	1104	ATAD2	29028	5.2387	0	0
AGR2	10551	PRRG1	5638	PTPRN2	5799	5.23268	0	0			AGR2	10551	NME5	8382	ACP6	51205	5.2333	0	0
AGR2	10551	APOL2	23780	FAM83E	54854	5.23027	0.0838816	0			AGR2	10551	PRRG1	5638	PTPRN2	5799	5.23268	0	0
AGR2	10551	EXOSC8	11340	WFDC1	58189	5.22826	0	0			AGR2	10551	APOL2	23780	FAM83E	54854	5.23027	0.0838816	0
AGR2	10551	MGC11266	79172	MMRN2	79812	5.22462	1.59097	0			AGR2	10551	EXOSC8	11340	WFDC1	58189	5.22826	0	0
AGR2	10551	RNPS1	10921	ADCY4	196883	5.22011	0	0			AGR2	10551	MGC11266	79172	MMRN2	79812	5.22462	1.59097	0
AGR2	10551	OSBPL2	9885	RAVER2	55225	5.21998	0	0			AGR2	10551	RNPS1	10921	ADCY4	196883	5.22011	0	0
AGR2	10551	KCNE1	3753	MMRN2	79812	5.21929	0	0			AGR2	10551	OSBPL2	9885	RAVER2	55225	5.21998	0	0
AGR2	10551	OSBPL2	9885	AGR2	10551	5.21897	3.06211	0			AGR2	10551	KCNE1	3753	MMRN2	79812	5.21929	0	0
AGR2	10551	PTPRN2	5799	SPAG6	9576	5.21244	0	0			AGR2	10551	OSBPL2	9885	AGR2	10551	5.21897	3.06211	0
AGR2	10551	MGC13040	85016	WDR63	126820	5.21075	7.5717	0			AGR2	10551	PTPRN2	5799	SPAG6	9576	5.21244	0	0
AGR2	10551	DBH	1621	CCL25	6370	5.20786	0	0			AGR2	10551	MGC13040	85016	WDR63	126820	5.21075	7.5717	0
AGR2	10551	PSMD2	5708	LOC402221	402221	5.20747	0	0			AGR2	10551	DBH	1621	CCL25	6370	5.20786	0	0
AGR2	10551	VIP	7432	OSBPL2	9885	5.20579	1.54991	0			AGR2	10551	PSMD2	5708	LOC402221	402221	5.20747	0	0
AGR2	10551	RPGR	6103	WDR63	126820	5.20503	0.781888	0			AGR2	10551	VIP	7432	OSBPL2	9885	5.20579	1.54991	0
AGR2	10551	POLB	5423	MGC11266	79172	5.20458	0	0			AGR2	10551	RPGR	6103	WDR63	126820	5.20503	0.781888	0
AGR2	10551	PSAT1	29968	SNRK	54861	5.20439	0.686399	0			AGR2	10551	POLB	5423	MGC11266	79172	5.20458	0	0
AGR2	10551	CA4	762	FOXA3	3171	5.20007	0	0			AGR2	10551	PSAT1	29968	SNRK	54861	5.20439	0.686399	0
AGR2	10551	PSMD2	5708	CUEDC2	79004	5.19817	3.00682	0			AGR2	10551	CA4	762	FOXA3	3171	5.20007	0	0
AGR2	10551	S100A3	6274	AGR2	10551	5.19782	0	0			AGR2	10551	PSMD2	5708	CUEDC2	79004	5.19817	3.00682	0
AGR2	10551	RCC1	1104	CKB	1152	5.19692	0	0			AGR2	10551	S100A3	6274	AGR2	10551	5.19782	0	0
AGR2	10551	ECHS1	1892	RAVER2	55225	5.19664	0.99115	0			AGR2	10551	RCC1	1104	CKB	1152	5.19692	0	0
AGR2	10551	AGR2	10551	PSAT1	29968	5.195	0	0			AGR2	10551	ECHS1	1892	RAVER2	55225	5.19664	0.99115	0
AGR2	10551	RBM25	58517	LOC148709	148709	5.19027	0	0			AGR2	10551	AGR2	10551	PSAT1	29968	5.195	0	0
AGR2	10551	YARS	8565	WDR63	126820	5.18545	0	0			AGR2	10551	RBM25	58517	LOC148709	148709	5.19027	0	0
AGR2	10551	ACP6	51205	MANEAL	149175	5.18373	0	0			AGR2	10551	YARS	8565	WDR63	126820	5.18545	0	0
AGR2	10551	PSMD11	5717	MGC11266	79172	5.18152	0.251073	0			AGR2	10551	ACP6	51205	MANEAL	149175	5.18373	0	0
AGR2	10551	GMDS	2762	ATAD2	29028	5.17985	0	0			AGR2	10551	PSMD11	5717	MGC11266	79172	5.18152	0.251073	0
AGR2	10551	WFDC1	58189	DOCK5	80005	5.17859	1.29511	0			AGR2	10551	GMDS	2762	ATAD2	29028	5.17985	0	0
AGR2	10551	EFEMP1	2202	WDR78	79819	5.1749	0	0			AGR2	10551	WFDC1	58189	DOCK5	80005	5.17859	1.29511	0
AGR2	10551	SPAG6	9576	ATAD2	29028	5.17466	0	0			AGR2	10551	EFEMP1	2202	WDR78	79819	5.1749	0	0
AGR2	10551	RPGR	6103	PALM2-AKAP2	445815	5.17204	0	0			AGR2	10551	SPAG6	9576	ATAD2	29028	5.17466	0	0
AGR2	10551	PTPRB	5787	KIF12	113220	5.16311	0	0			AGR2	10551	RPGR	6103	PALM2-AKAP2	445815	5.17204	0	0
AGR2	10551	CCL25	6370	AGR2	10551	5.16113	0	0			AGR2	10551	PTPRB	5787	KIF12	113220	5.16311	0	0
AGR2	10551	ECHS1	1892	SPTY2D1	144108	5.15965	2.6296	0			AGR2	10551	CCL25	6370	AGR2	10551	5.16113	0	0
AGR2	10551	EFEMP1	2202	AGR2	10551	5.14465	0	0			AGR2	10551	ECHS1	1892	SPTY2D1	144108	5.15965	2.6296	0
AGR2	10551	ZNF646	9726	CUEDC2	79004	5.14328	1.87604	0			AGR2	10551	EFEMP1	2202	AGR2	10551	5.14465	0	0
AGR2	10551	TBX3	6926	WNT11	7481	5.14172	1.65604	0			AGR2	10551	ZNF646	9726	CUEDC2	79004	5.14328	1.87604	0
AGR2	10551	HKDC1	80201	TTTY9B	425057	5.13966	1.03509	0			AGR2	10551	TBX3	6926	WNT11	7481	5.14172	1.65604	0
AGR2	10551	YARS	8565	ITLN2	142683	5.13726	0.428038	0			AGR2	10551	HKDC1	80201	TTTY9B	425057	5.13966	1.03509	0
AGR2	10551	DFFA	1676	KCNE1	3753	5.134	0	0			AGR2	10551	YARS	8565	ITLN2	142683	5.13726	0.428038	0
AGR2	10551	FCN3	8547	AGR2	10551	5.13345	0	0			AGR2	10551	DFFA	1676	KCNE1	3753	5.134	0	0
AGR2	10551	HKDC1	80201	WDR63	126820	5.13312	1.53161	0			AGR2	10551	FCN3	8547	AGR2	10551	5.13345	0	0
AGR2	10551	POLB	5423	TBC1D24	57465	5.13282	0	0			AGR2	10551	HKDC1	80201	WDR63	126820	5.13312	1.53161	0
AGR2	10551	ID1	3397	AGR2	10551	5.13204	0	0			AGR2	10551	POLB	5423	TBC1D24	57465	5.13282	0	0
AGR2	10551	AGR2	10551	ITLN1	55600	5.12544	0	0			AGR2	10551	ID1	3397	AGR2	10551	5.13204	0	0
AGR2	10551	GNAT1	2779	ID1	3397	5.12335	0	0			AGR2	10551	AGR2	10551	ITLN1	55600	5.12544	0	0
AGR2	10551	ERN2	10595	ACP6	51205	5.12334	0.929951	0			AGR2	10551	GNAT1	2779	ID1	3397	5.12335	0	0
AGR2	10551	STX1A	6804	PCDHAC1	56135	5.12229	0	0			AGR2	10551	ERN2	10595	ACP6	51205	5.12334	0.929951	0
AGR2	10551	PANX2	56666	HKDC1	80201	5.11994	0.795212	0			AGR2	10551	STX1A	6804	PCDHAC1	56135	5.12229	0	0
AGR2	10551	AGR2	10551	SMOX	54498	5.11401	0	0			AGR2	10551	PANX2	56666	HKDC1	80201	5.11994	0.795212	0
AGR2	10551	ALB	213	SPDEF	25803	5.10653	0	0			AGR2	10551	AGR2	10551	SMOX	54498	5.11401	0	0
AGR2	10551	ATAD2	29028	WFDC1	58189	5.1048	0	0			AGR2	10551	ALB	213	SPDEF	25803	5.10653	0	0
AGR2	10551	ANP32A	8125	EXOSC8	11340	5.10283	0	0			AGR2	10551	ATAD2	29028	WFDC1	58189	5.1048	0	0
AGR2	10551	UPB1	51733	DOCK5	80005	5.10099	0.940694	0			AGR2	10551	ANP32A	8125	EXOSC8	11340	5.10283	0	0
AGR2	10551	ERN2	10595	PANX2	56666	5.0995	3.11676	0			AGR2	10551	UPB1	51733	DOCK5	80005	5.10099	0.940694	0
AGR2	10551	REEP5	7905	SPDEF	25803	5.09472	0	0			AGR2	10551	ERN2	10595	PANX2	56666	5.0995	3.11676	0
AGR2	10551	KCNK3	3777	AGR2	10551	5.09398	0.332056	0			AGR2	10551	REEP5	7905	SPDEF	25803	5.09472	0	0
AGR2	10551	HSP90AB1	3326	RNF141	50862	5.09213	0	0			AGR2	10551	KCNK3	3777	AGR2	10551	5.09398	0.332056	0
AGR2	10551	CA4	762	WDR78	79819	5.09155	1.83683	0			AGR2	10551	HSP90AB1	3326	RNF141	50862	5.09213	0	0
AGR2	10551	MANEAL	149175	ADCY4	196883	5.08973	0	0			AGR2	10551	CA4	762	WDR78	79819	5.09155	1.83683	0
AGR2	10551	CKB	1152	HSP90AB1	3326	5.08964	0	0			AGR2	10551	MANEAL	149175	ADCY4	196883	5.08973	0	0
AGR2	10551	TRAFD1	10906	MANEAL	149175	5.08797	0	0			AGR2	10551	CKB	1152	HSP90AB1	3326	5.08964	0	0
AGR2	10551	RCC1	1104	ANP32A	8125	5.08789	0	0			AGR2	10551	TRAFD1	10906	MANEAL	149175	5.08797	0	0
AGR2	10551	PDE5A	8654	DOCK5	80005	5.08755	0	0			AGR2	10551	RCC1	1104	ANP32A	8125	5.08789	0	0
AGR2	10551	ANP32A	8125	STUB1	10273	5.08086	0	0			AGR2	10551	PDE5A	8654	DOCK5	80005	5.08755	0	0
AGR2	10551	MRPS31	10240	AGR2	10551	5.07912	0	0			AGR2	10551	ANP32A	8125	STUB1	10273	5.08086	0	0
AGR2	10551	APOL2	23780	SPTY2D1	144108	5.07757	1.5529	0			AGR2	10551	MRPS31	10240	AGR2	10551	5.07912	0	0
AGR2	10551	MUC5AC	4586	YARS	8565	5.07746	0	0			AGR2	10551	APOL2	23780	SPTY2D1	144108	5.07757	1.5529	0
AGR2	10551	TBX3	6926	REEP5	7905	5.06862	0.721327	0			AGR2	10551	MUC5AC	4586	YARS	8565	5.07746	0	0
AGR2	10551	APOL1	8542	ARMC4	55130	5.06811	0.661871	0			AGR2	10551	TBX3	6926	REEP5	7905	5.06862	0.721327	0
AGR2	10551	RPGR	6103	VIP	7432	5.06725	0	0			AGR2	10551	APOL1	8542	ARMC4	55130	5.06811	0.661871	0
AGR2	10551	SLPI	6590	KLHL4	56062	5.06506	0	0			AGR2	10551	RPGR	6103	VIP	7432	5.06725	0	0
AGR2	10551	BCHE	590	YARS	8565	5.04687	0	0			AGR2	10551	SLPI	6590	KLHL4	56062	5.06506	0	0
AGR2	10551	ECHS1	1892	RPGR	6103	5.04457	2.14632	0			AGR2	10551	BCHE	590	YARS	8565	5.04687	0	0
AGR2	10551	SPAG6	9576	DLL4	54567	5.04219	2.83035	0			AGR2	10551	ECHS1	1892	RPGR	6103	5.04457	2.14632	0
AGR2	10551	CASP10	843	WNT11	7481	5.04046	0.501469	0			AGR2	10551	SPAG6	9576	DLL4	54567	5.04219	2.83035	0
AGR2	10551	TEK	7010	DLL4	54567	5.04035	0.201785	0			AGR2	10551	CASP10	843	WNT11	7481	5.04046	0.501469	0
AGR2	10551	ART4	420	IGSF22	283284	5.04013	0	0			AGR2	10551	TEK	7010	DLL4	54567	5.04035	0.201785	0
AGR2	10551	PSMD2	5708	AGR2	10551	5.0383	0.794676	0			AGR2	10551	ART4	420	IGSF22	283284	5.04013	0	0
AGR2	10551	HSP90AB1	3326	SMOX	54498	5.03786	0	0			AGR2	10551	PSMD2	5708	AGR2	10551	5.0383	0.794676	0
AGR2	10551	REEP5	7905	KIF12	113220	5.03702	0.0372295	0			AGR2	10551	HSP90AB1	3326	SMOX	54498	5.03786	0	0
AGR2	10551	DLL4	54567	ITLN2	142683	5.03566	0	0			AGR2	10551	REEP5	7905	KIF12	113220	5.03702	0.0372295	0
AGR2	10551	CCL25	6370	ZDHHC3	51304	5.03303	2.70038	0			AGR2	10551	DLL4	54567	ITLN2	142683	5.03566	0	0
AGR2	10551	SLPI	6590	SPAG6	9576	5.03163	0.658251	0			AGR2	10551	CCL25	6370	ZDHHC3	51304	5.03303	2.70038	0
AGR2	10551	ZNF646	9726	STARD7	56910	5.0304	0.118063	0			AGR2	10551	SLPI	6590	SPAG6	9576	5.03163	0.658251	0
AGR2	10551	ABL1	25	AGR2	10551	5.02872	1.24376	0			AGR2	10551	ZNF646	9726	STARD7	56910	5.0304	0.118063	0
AGR2	10551	UPB1	51733	KIF12	113220	5.02392	1.91549	0			AGR2	10551	ABL1	25	AGR2	10551	5.02872	1.24376	0
AGR2	10551	MBNL1	4154	LOC148709	148709	5.02352	0	0			AGR2	10551	UPB1	51733	KIF12	113220	5.02392	1.91549	0
AGR2	10551	ID1	3397	PTPRN2	5799	5.02284	0	0			AGR2	10551	MBNL1	4154	LOC148709	148709	5.02352	0	0
AGR2	10551	TRAFD1	10906	PALM2-AKAP2	445815	5.02102	0	0			AGR2	10551	ID1	3397	PTPRN2	5799	5.02284	0	0
AGR2	10551	PANX2	56666	WDR78	79819	5.02024	0	0			AGR2	10551	TRAFD1	10906	PALM2-AKAP2	445815	5.02102	0	0
AGR2	10551	ZNF646	9726	MRPS18B	28973	5.02016	1.14826	0			AGR2	10551	PANX2	56666	WDR78	79819	5.02024	0	0
AGR2	10551	LPGAT1	9926	AGR2	10551	5.01964	0	0			AGR2	10551	ZNF646	9726	MRPS18B	28973	5.02016	1.14826	0
AGR2	10551	SPAG6	9576	ZNF646	9726	5.01876	2.08794	0			AGR2	10551	LPGAT1	9926	AGR2	10551	5.01964	0	0
AGR2	10551	MRPS31	10240	XKRX	402415	5.01862	0.0155652	0			AGR2	10551	SPAG6	9576	ZNF646	9726	5.01876	2.08794	0
AGR2	10551	FOXA3	3171	ITLN1	55600	5.01853	0.285056	0			AGR2	10551	MRPS31	10240	XKRX	402415	5.01862	0.0155652	0
AGR2	10551	CAPS	828	LOC402221	402221	5.01518	0	0			AGR2	10551	FOXA3	3171	ITLN1	55600	5.01853	0.285056	0
AGR2	10551	YARS	8565	LRRC18	474354	5.0143	0	0			AGR2	10551	CAPS	828	LOC402221	402221	5.01518	0	0
AGR2	10551	PSMD2	5708	ANP32A	8125	5.00968	0.126279	0			AGR2	10551	YARS	8565	LRRC18	474354	5.0143	0	0
AGR2	10551	BCHE	590	EFCAB1	79645	5.00864	0	0			AGR2	10551	PSMD2	5708	ANP32A	8125	5.00968	0.126279	0
AGR2	10551	HSP90AB1	3326	ATAD2	29028	5.00658	1.02002	0			AGR2	10551	BCHE	590	EFCAB1	79645	5.00864	0	0
AGR2	10551	FOXA3	3171	SMOX	54498	5.00545	0.118175	0			AGR2	10551	HSP90AB1	3326	ATAD2	29028	5.00658	1.02002	0
AGR2	10551	WDR63	126820	SPTY2D1	144108	5.0029	0	0			AGR2	10551	FOXA3	3171	SMOX	54498	5.00545	0.118175	0
AGR2	10551	SNRPA	6626	TRAFD1	10906	5.00203	0	0			AGR2	10551	WDR63	126820	SPTY2D1	144108	5.0029	0	0
AGR2	10551	SLPI	6590	SPDEF	25803	5.00004	6.42593	0			AGR2	10551	SNRPA	6626	TRAFD1	10906	5.00203	0	0
AGR2	10551	SRM	6723	SPAG6	9576	4.99701	0	0			AGR2	10551	SLPI	6590	SPDEF	25803	5.00004	6.42593	0
AGR2	10551	HMGCS2	3158	PRRG1	5638	4.99425	0	0			AGR2	10551	SRM	6723	SPAG6	9576	4.99701	0	0
AGR2	10551	DFFA	1676	SNRK	54861	4.99313	0.235941	0			AGR2	10551	HMGCS2	3158	PRRG1	5638	4.99425	0	0
AGR2	10551	TBC1D24	57465	MANEAL	149175	4.99259	0.295923	0			AGR2	10551	DFFA	1676	SNRK	54861	4.99313	0.235941	0
AGR2	10551	FCN3	8547	KIF12	113220	4.99141	3.69929	0			AGR2	10551	TBC1D24	57465	MANEAL	149175	4.99259	0.295923	0
AGR2	10551	AGR2	10551	MMRN2	79812	4.99105	0	0			AGR2	10551	FCN3	8547	KIF12	113220	4.99141	3.69929	0
AGR2	10551	ERN2	10595	LOC148709	148709	4.99078	0.872768	0			AGR2	10551	AGR2	10551	MMRN2	79812	4.99105	0	0
AGR2	10551	PDE5A	8654	TTTY9B	425057	4.99056	2.99593	0			AGR2	10551	ERN2	10595	LOC148709	148709	4.99078	0.872768	0
AGR2	10551	RCC1	1104	TBC1D24	57465	4.98743	0	0			AGR2	10551	PDE5A	8654	TTTY9B	425057	4.99056	2.99593	0
AGR2	10551	GNAT1	2779	ARMC4	55130	4.98147	0	0			AGR2	10551	RCC1	1104	TBC1D24	57465	4.98743	0	0
AGR2	10551	RCC1	1104	ITLN1	55600	4.97908	0	0			AGR2	10551	GNAT1	2779	ARMC4	55130	4.98147	0	0
AGR2	10551	AGR2	10551	THSD1	55901	4.97898	0	0			AGR2	10551	RCC1	1104	ITLN1	55600	4.97908	0	0
AGR2	10551	RAVER2	55225	C9orf26	90865	4.97584	0.720542	0			AGR2	10551	AGR2	10551	THSD1	55901	4.97898	0	0
AGR2	10551	CASP10	843	C6orf201	404220	4.97503	1.3028	0			AGR2	10551	RAVER2	55225	C9orf26	90865	4.97584	0.720542	0
AGR2	10551	PDE5A	8654	FAM107A	11170	4.97466	0	0			AGR2	10551	CASP10	843	C6orf201	404220	4.97503	1.3028	0
AGR2	10551	UGT2B10	7365	SMOX	54498	4.97323	0	0			AGR2	10551	PDE5A	8654	FAM107A	11170	4.97466	0	0
AGR2	10551	YARS	8565	TBC1D24	57465	4.97276	0	0			AGR2	10551	UGT2B10	7365	SMOX	54498	4.97323	0	0
AGR2	10551	DBH	1621	PTPRN2	5799	4.96885	0.775235	0			AGR2	10551	YARS	8565	TBC1D24	57465	4.97276	0	0
AGR2	10551	MGC11266	79172	XKRX	402415	4.96711	0	0			AGR2	10551	DBH	1621	PTPRN2	5799	4.96885	0.775235	0
AGR2	10551	EXOSC8	11340	RBM25	58517	4.96707	0	0			AGR2	10551	MGC11266	79172	XKRX	402415	4.96711	0	0
AGR2	10551	DBH	1621	DFFA	1676	4.95738	0.536632	0			AGR2	10551	EXOSC8	11340	RBM25	58517	4.96707	0	0
AGR2	10551	RCC1	1104	HPD	3242	4.95201	2.88033	0			AGR2	10551	DBH	1621	DFFA	1676	4.95738	0.536632	0
AGR2	10551	CAPS	828	KIF12	113220	4.9473	0	0			AGR2	10551	RCC1	1104	HPD	3242	4.95201	2.88033	0
AGR2	10551	PSMD11	5717	RBM25	58517	4.94682	0	0			AGR2	10551	CAPS	828	KIF12	113220	4.9473	0	0
AGR2	10551	CAPS	828	ATAD2	29028	4.94475	0.263451	0			AGR2	10551	PSMD11	5717	RBM25	58517	4.94682	0	0
AGR2	10551	AGR2	10551	SHANK2	22941	4.94443	0	0			AGR2	10551	CAPS	828	ATAD2	29028	4.94475	0.263451	0
AGR2	10551	TBX3	6926	AGR2	10551	4.94433	1.39948	0			AGR2	10551	AGR2	10551	SHANK2	22941	4.94443	0	0
AGR2	10551	ECHS1	1892	AGR2	10551	4.9442	2.64705	0			AGR2	10551	TBX3	6926	AGR2	10551	4.94433	1.39948	0
AGR2	10551	PTPRN2	5799	UPB1	51733	4.94388	0.0343746	0			AGR2	10551	ECHS1	1892	AGR2	10551	4.9442	2.64705	0
AGR2	10551	UPB1	51733	ADCY4	196883	4.94188	0	0			AGR2	10551	PTPRN2	5799	UPB1	51733	4.94388	0.0343746	0
AGR2	10551	ERN2	10595	TTTY9B	425057	4.9418	0	0			AGR2	10551	UPB1	51733	ADCY4	196883	4.94188	0	0
AGR2	10551	VIP	7432	RNF141	50862	4.94031	0	0			AGR2	10551	ERN2	10595	TTTY9B	425057	4.9418	0	0
AGR2	10551	WFDC1	58189	C15orf26	161502	4.93988	0.451553	0			AGR2	10551	VIP	7432	RNF141	50862	4.94031	0	0
AGR2	10551	SRM	6723	HKDC1	80201	4.93806	0	0			AGR2	10551	WFDC1	58189	C15orf26	161502	4.93988	0.451553	0
AGR2	10551	GMDS	2762	ID1	3397	4.93411	0	0			AGR2	10551	SRM	6723	HKDC1	80201	4.93806	0	0
AGR2	10551	ZDHHC3	51304	SNRK	54861	4.93233	0	0			AGR2	10551	GMDS	2762	ID1	3397	4.93411	0	0
AGR2	10551	FCN3	8547	RNPS1	10921	4.93148	0	0			AGR2	10551	ZDHHC3	51304	SNRK	54861	4.93233	0	0
AGR2	10551	STX1A	6804	SPTY2D1	144108	4.93088	2.70479	0			AGR2	10551	FCN3	8547	RNPS1	10921	4.93148	0	0
AGR2	10551	STX1A	6804	APOL2	23780	4.93071	0.847215	0			AGR2	10551	STX1A	6804	SPTY2D1	144108	4.93088	2.70479	0
AGR2	10551	LPGAT1	9926	PCDHA3	56145	4.93009	3.86098	0			AGR2	10551	STX1A	6804	APOL2	23780	4.93071	0.847215	0
AGR2	10551	ART4	420	MGC13040	85016	4.92918	1.26871	0			AGR2	10551	LPGAT1	9926	PCDHA3	56145	4.93009	3.86098	0
AGR2	10551	ASAH1	427	CUEDC2	79004	4.92825	0.00860722	0			AGR2	10551	ART4	420	MGC13040	85016	4.92918	1.26871	0
AGR2	10551	MCC	4163	ADCY4	196883	4.92785	2.30201	0			AGR2	10551	ASAH1	427	CUEDC2	79004	4.92825	0.00860722	0
AGR2	10551	PTPRB	5787	SPAG6	9576	4.92726	0.958072	0			AGR2	10551	MCC	4163	ADCY4	196883	4.92785	2.30201	0
AGR2	10551	HMGCS2	3158	S100A3	6274	4.92175	0	0			AGR2	10551	PTPRB	5787	SPAG6	9576	4.92726	0.958072	0
AGR2	10551	BDKRB2	624	PSAT1	29968	4.92075	0	0			AGR2	10551	HMGCS2	3158	S100A3	6274	4.92175	0	0
AGR2	10551	OSBPL2	9885	SNRK	54861	4.91926	0	0			AGR2	10551	BDKRB2	624	PSAT1	29968	4.92075	0	0
AGR2	10551	SRM	6723	SNRK	54861	4.91886	0.470788	0			AGR2	10551	OSBPL2	9885	SNRK	54861	4.91926	0	0
AGR2	10551	AGR2	10551	OR5B12	390191	4.91874	0.238393	0			AGR2	10551	SRM	6723	SNRK	54861	4.91886	0.470788	0
AGR2	10551	EFCAB1	79645	MANEAL	149175	4.91713	0.452079	0			AGR2	10551	AGR2	10551	OR5B12	390191	4.91874	0.238393	0
AGR2	10551	MRPS18B	28973	UPB1	51733	4.91239	0	0			AGR2	10551	EFCAB1	79645	MANEAL	149175	4.91713	0.452079	0
AGR2	10551	KCNE1	3753	ATAD2	29028	4.90848	0	0			AGR2	10551	MRPS18B	28973	UPB1	51733	4.91239	0	0
AGR2	10551	KCNE1	3753	MUC5AC	4586	4.90806	8.61996	0			AGR2	10551	KCNE1	3753	ATAD2	29028	4.90848	0	0
AGR2	10551	REEP5	7905	HKDC1	80201	4.90742	0	0			AGR2	10551	KCNE1	3753	MUC5AC	4586	4.90806	8.61996	0
AGR2	10551	WDR78	79819	WDR63	126820	4.90686	8.41755	0			AGR2	10551	REEP5	7905	HKDC1	80201	4.90742	0	0
AGR2	10551	LOC148709	148709	C15orf26	161502	4.90578	2.14743	0			AGR2	10551	WDR78	79819	WDR63	126820	4.90686	8.41755	0
AGR2	10551	PSAT1	29968	SPTY2D1	144108	4.90545	0	0			AGR2	10551	LOC148709	148709	C15orf26	161502	4.90578	2.14743	0
AGR2	10551	PSAT1	29968	WDR63	126820	4.90497	0	0			AGR2	10551	PSAT1	29968	SPTY2D1	144108	4.90545	0	0
AGR2	10551	STUB1	10273	ITLN2	142683	4.90467	3.47576	0			AGR2	10551	PSAT1	29968	WDR63	126820	4.90497	0	0
AGR2	10551	ART4	420	C6orf201	404220	4.90315	0.509538	0			AGR2	10551	STUB1	10273	ITLN2	142683	4.90467	3.47576	0
AGR2	10551	AGR2	10551	MRPS18B	28973	4.90306	0.964887	0			AGR2	10551	ART4	420	C6orf201	404220	4.90315	0.509538	0
AGR2	10551	PDE5A	8654	PANX2	56666	4.89716	0	0			AGR2	10551	AGR2	10551	MRPS18B	28973	4.90306	0.964887	0
AGR2	10551	KCNE1	3753	KIF12	113220	4.8948	0	0			AGR2	10551	PDE5A	8654	PANX2	56666	4.89716	0	0
AGR2	10551	GNAT1	2779	SMOX	54498	4.88722	1.26932	0			AGR2	10551	KCNE1	3753	KIF12	113220	4.8948	0	0
AGR2	10551	HIST1H1B	3009	PSAT1	29968	4.88657	0.433524	0			AGR2	10551	GNAT1	2779	SMOX	54498	4.88722	1.26932	0
AGR2	10551	PRRG2	5639	SHANK2	22941	4.88595	1.77005	0			AGR2	10551	HIST1H1B	3009	PSAT1	29968	4.88657	0.433524	0
AGR2	10551	EFCAB1	79645	DOCK5	80005	4.88558	0	0			AGR2	10551	PRRG2	5639	SHANK2	22941	4.88595	1.77005	0
AGR2	10551	PDE5A	8654	AGR2	10551	4.88474	1.79627	0			AGR2	10551	EFCAB1	79645	DOCK5	80005	4.88558	0	0
AGR2	10551	ERN2	10595	SNRK	54861	4.88176	0.0507892	0			AGR2	10551	PDE5A	8654	AGR2	10551	4.88474	1.79627	0
AGR2	10551	ID1	3397	RAVER2	55225	4.88021	2.27485	0			AGR2	10551	ERN2	10595	SNRK	54861	4.88176	0.0507892	0
AGR2	10551	WNT11	7481	FAM83E	54854	4.87645	0.436627	0			AGR2	10551	ID1	3397	RAVER2	55225	4.88021	2.27485	0
AGR2	10551	STARD7	56910	C6orf201	404220	4.87627	0	0			AGR2	10551	WNT11	7481	FAM83E	54854	4.87645	0.436627	0
AGR2	10551	BDKRB2	624	ACP6	51205	4.87539	0.224483	0			AGR2	10551	STARD7	56910	C6orf201	404220	4.87627	0	0
AGR2	10551	EFEMP1	2202	SNRPA	6626	4.87318	2.05354	0			AGR2	10551	BDKRB2	624	ACP6	51205	4.87539	0.224483	0
AGR2	10551	ATAD2	29028	LOC148709	148709	4.86748	0.788276	0			AGR2	10551	EFEMP1	2202	SNRPA	6626	4.87318	2.05354	0
AGR2	10551	BCHE	590	ID1	3397	4.86721	0	0			AGR2	10551	ATAD2	29028	LOC148709	148709	4.86748	0.788276	0
AGR2	10551	CASP10	843	OSBPL2	9885	4.86355	0	0			AGR2	10551	BCHE	590	ID1	3397	4.86721	0	0
AGR2	10551	ATAD2	29028	SNRK	54861	4.86353	5.13466	0			AGR2	10551	CASP10	843	OSBPL2	9885	4.86355	0	0
AGR2	10551	ID1	3397	SMOX	54498	4.86347	1.14022	0			AGR2	10551	ATAD2	29028	SNRK	54861	4.86353	5.13466	0
AGR2	10551	YARS	8565	SPAG6	9576	4.86213	0	0			AGR2	10551	ID1	3397	SMOX	54498	4.86347	1.14022	0
AGR2	10551	PTPRN2	5799	FAM107A	11170	4.85936	0	0			AGR2	10551	YARS	8565	SPAG6	9576	4.86213	0	0
AGR2	10551	OR5B12	390191	TTTY9B	425057	4.85673	0	0			AGR2	10551	PTPRN2	5799	FAM107A	11170	4.85936	0	0
AGR2	10551	KIF12	113220	LOC402221	402221	4.85217	0	0			AGR2	10551	OR5B12	390191	TTTY9B	425057	4.85673	0	0
AGR2	10551	TEK	7010	EFCAB1	79645	4.84862	0.877662	0			AGR2	10551	KIF12	113220	LOC402221	402221	4.85217	0	0
AGR2	10551	HSP90AB1	3326	ZNF646	9726	4.84494	1.99033	0			AGR2	10551	TEK	7010	EFCAB1	79645	4.84862	0.877662	0
AGR2	10551	PTPRB	5787	RAVER2	55225	4.84106	0.718705	0			AGR2	10551	HSP90AB1	3326	ZNF646	9726	4.84494	1.99033	0
AGR2	10551	ABL1	25	CASP10	843	4.84068	0	0			AGR2	10551	PTPRB	5787	RAVER2	55225	4.84106	0.718705	0
AGR2	10551	GMDS	2762	ITLN1	55600	4.83937	0	0			AGR2	10551	ABL1	25	CASP10	843	4.84068	0	0
AGR2	10551	HMGCS2	3158	SRM	6723	4.83878	0	0			AGR2	10551	GMDS	2762	ITLN1	55600	4.83937	0	0
AGR2	10551	CUEDC2	79004	C6orf201	404220	4.83717	0	0			AGR2	10551	HMGCS2	3158	SRM	6723	4.83878	0	0
AGR2	10551	P2RY4	5030	NME5	8382	4.8371	0	0			AGR2	10551	CUEDC2	79004	C6orf201	404220	4.83717	0	0
AGR2	10551	CASP10	843	C9orf26	90865	4.8367	3.84819	0			AGR2	10551	P2RY4	5030	NME5	8382	4.8371	0	0
AGR2	10551	SNRPA	6626	VIP	7432	4.8355	0	0			AGR2	10551	CASP10	843	C9orf26	90865	4.8367	3.84819	0
AGR2	10551	GMDS	2762	ADCY4	196883	4.83422	0	0			AGR2	10551	SNRPA	6626	VIP	7432	4.8355	0	0
AGR2	10551	CUEDC2	79004	KIF12	113220	4.83123	4.64882	0			AGR2	10551	GMDS	2762	ADCY4	196883	4.83422	0	0
AGR2	10551	KCNE1	3753	OR5B12	390191	4.82923	0	0			AGR2	10551	CUEDC2	79004	KIF12	113220	4.83123	4.64882	0
AGR2	10551	CASP10	843	PKHD1	5314	4.82722	0	0			AGR2	10551	KCNE1	3753	OR5B12	390191	4.82923	0	0
AGR2	10551	TEK	7010	LRRC18	474354	4.82717	0.0485337	0			AGR2	10551	CASP10	843	PKHD1	5314	4.82722	0	0
AGR2	10551	PTPRN2	5799	LRRC18	474354	4.82559	0	0			AGR2	10551	TEK	7010	LRRC18	474354	4.82717	0.0485337	0
AGR2	10551	RAPGEF6	51735	WDR63	126820	4.82502	0.444583	0			AGR2	10551	PTPRN2	5799	LRRC18	474354	4.82559	0	0
AGR2	10551	PSAT1	29968	C6orf201	404220	4.82345	0	0			AGR2	10551	RAPGEF6	51735	WDR63	126820	4.82502	0.444583	0
AGR2	10551	MRPS31	10240	WFDC1	58189	4.82306	0.571482	0			AGR2	10551	PSAT1	29968	C6orf201	404220	4.82345	0	0
AGR2	10551	KCNK3	3777	KIF12	113220	4.82113	0.76783	0			AGR2	10551	MRPS31	10240	WFDC1	58189	4.82306	0.571482	0
AGR2	10551	STX1A	6804	ERN2	10595	4.81532	0.360804	0			AGR2	10551	KCNK3	3777	KIF12	113220	4.82113	0.76783	0
AGR2	10551	AGR2	10551	LOC402221	402221	4.81474	0.835157	0			AGR2	10551	STX1A	6804	ERN2	10595	4.81532	0.360804	0
AGR2	10551	ECHS1	1892	NME5	8382	4.81183	0	0			AGR2	10551	AGR2	10551	LOC402221	402221	4.81474	0.835157	0
AGR2	10551	PRRG1	5638	ZDHHC18	84243	4.80796	0	0			AGR2	10551	ECHS1	1892	NME5	8382	4.81183	0	0
AGR2	10551	RBM25	58517	MMRN2	79812	4.80186	0	0			AGR2	10551	PRRG1	5638	ZDHHC18	84243	4.80796	0	0
AGR2	10551	HIST1H1B	3009	MMRN2	79812	4.79665	0	0			AGR2	10551	RBM25	58517	MMRN2	79812	4.80186	0	0
AGR2	10551	TBX3	6926	TEK	7010	4.79388	1.9933	0			AGR2	10551	HIST1H1B	3009	MMRN2	79812	4.79665	0	0
AGR2	10551	ZNF646	9726	PCDHAC1	56135	4.7905	0	0			AGR2	10551	TBX3	6926	TEK	7010	4.79388	1.9933	0
AGR2	10551	CKB	1152	C6orf201	404220	4.78923	0	0			AGR2	10551	ZNF646	9726	PCDHAC1	56135	4.7905	0	0
AGR2	10551	EFEMP1	2202	VIP	7432	4.7876	0.0153998	0			AGR2	10551	CKB	1152	C6orf201	404220	4.78923	0	0
AGR2	10551	RCC1	1104	RAPGEF6	51735	4.78473	0	0			AGR2	10551	EFEMP1	2202	VIP	7432	4.7876	0.0153998	0
AGR2	10551	NME5	8382	CUEDC2	79004	4.78328	0	0			AGR2	10551	RCC1	1104	RAPGEF6	51735	4.78473	0	0
AGR2	10551	SHANK2	22941	DLL4	54567	4.78088	0	0			AGR2	10551	NME5	8382	CUEDC2	79004	4.78328	0	0
AGR2	10551	ECHS1	1892	STUB1	10273	4.78064	4.87583	0			AGR2	10551	SHANK2	22941	DLL4	54567	4.78088	0	0
AGR2	10551	DBH	1621	YARS	8565	4.77768	0	0			AGR2	10551	ECHS1	1892	STUB1	10273	4.78064	4.87583	0
AGR2	10551	TEK	7010	AGR2	10551	4.77741	0	0			AGR2	10551	DBH	1621	YARS	8565	4.77768	0	0
AGR2	10551	FCN3	8547	YARS	8565	4.77247	0	0			AGR2	10551	TEK	7010	AGR2	10551	4.77741	0	0
AGR2	10551	YARS	8565	PCDHAC1	56135	4.77211	0	0			AGR2	10551	FCN3	8547	YARS	8565	4.77247	0	0
AGR2	10551	CAPS	828	AGR2	10551	4.77034	1.39998	0			AGR2	10551	YARS	8565	PCDHAC1	56135	4.77211	0	0
AGR2	10551	AGR2	10551	LRRC18	474354	4.76583	3.65878	0			AGR2	10551	CAPS	828	AGR2	10551	4.77034	1.39998	0
AGR2	10551	RPGR	6103	EFCAB1	79645	4.76415	0.976106	0			AGR2	10551	AGR2	10551	LRRC18	474354	4.76583	3.65878	0
AGR2	10551	ADCY4	196883	XKRX	402415	4.76225	2.44665	0			AGR2	10551	RPGR	6103	EFCAB1	79645	4.76415	0.976106	0
AGR2	10551	PSMD11	5717	SNRPA	6626	4.76023	0	0			AGR2	10551	ADCY4	196883	XKRX	402415	4.76225	2.44665	0
AGR2	10551	APOL1	8542	RNF141	50862	4.75443	1.71209	0			AGR2	10551	PSMD11	5717	SNRPA	6626	4.76023	0	0
AGR2	10551	UGT2B10	7365	ZDHHC3	51304	4.75233	1.65038	0			AGR2	10551	APOL1	8542	RNF141	50862	4.75443	1.71209	0
AGR2	10551	CA4	762	STUB1	10273	4.75228	0.543986	0			AGR2	10551	UGT2B10	7365	ZDHHC3	51304	4.75233	1.65038	0
AGR2	10551	BCHE	590	ERN2	10595	4.74823	0.881863	0			AGR2	10551	CA4	762	STUB1	10273	4.75228	0.543986	0
AGR2	10551	HSP90AB1	3326	RBM25	58517	4.73657	0.455254	0			AGR2	10551	BCHE	590	ERN2	10595	4.74823	0.881863	0
AGR2	10551	RCC1	1104	DOCK5	80005	4.73333	0	0			AGR2	10551	HSP90AB1	3326	RBM25	58517	4.73657	0.455254	0
AGR2	10551	STX1A	6804	APOL1	8542	4.73315	0.248031	0			AGR2	10551	RCC1	1104	DOCK5	80005	4.73333	0	0
AGR2	10551	AGR2	10551	PCDHAC1	56135	4.73183	0	0			AGR2	10551	STX1A	6804	APOL1	8542	4.73315	0.248031	0
AGR2	10551	MGC11266	79172	LOC148709	148709	4.73107	0	0			AGR2	10551	AGR2	10551	PCDHAC1	56135	4.73183	0	0
AGR2	10551	ZNF646	9726	WDR78	79819	4.7284	0.453722	0			AGR2	10551	MGC11266	79172	LOC148709	148709	4.73107	0	0
AGR2	10551	ATAD2	29028	SMOX	54498	4.72219	0	0			AGR2	10551	ZNF646	9726	WDR78	79819	4.7284	0.453722	0
AGR2	10551	ADCY4	196883	LRRC18	474354	4.72153	0.608481	0			AGR2	10551	ATAD2	29028	SMOX	54498	4.72219	0	0
AGR2	10551	SHANK2	22941	ITLN2	142683	4.7189	0	0			AGR2	10551	ADCY4	196883	LRRC18	474354	4.72153	0.608481	0
AGR2	10551	POLB	5423	ERN2	10595	4.71853	0.679563	0			AGR2	10551	SHANK2	22941	ITLN2	142683	4.7189	0	0
AGR2	10551	KCNK3	3777	C9orf26	90865	4.71777	0.410204	0			AGR2	10551	POLB	5423	ERN2	10595	4.71853	0.679563	0
AGR2	10551	HIST1H1B	3009	PSMD11	5717	4.71592	0	0			AGR2	10551	KCNK3	3777	C9orf26	90865	4.71777	0.410204	0
AGR2	10551	PDE5A	8654	OR5B12	390191	4.71588	0	0			AGR2	10551	HIST1H1B	3009	PSMD11	5717	4.71592	0	0
AGR2	10551	GNAT1	2779	APOL2	23780	4.70945	0.417666	0			AGR2	10551	PDE5A	8654	OR5B12	390191	4.71588	0	0
AGR2	10551	HIST1H1B	3009	MRPS31	10240	4.70889	0	0			AGR2	10551	GNAT1	2779	APOL2	23780	4.70945	0.417666	0
AGR2	10551	WFDC1	58189	HKDC1	80201	4.70888	0.246039	0			AGR2	10551	HIST1H1B	3009	MRPS31	10240	4.70889	0	0
AGR2	10551	VIP	7432	NME5	8382	4.70499	0	0			AGR2	10551	WFDC1	58189	HKDC1	80201	4.70888	0.246039	0
AGR2	10551	UPB1	51733	C6orf201	404220	4.7028	0	0			AGR2	10551	VIP	7432	NME5	8382	4.70499	0	0
AGR2	10551	PRRG2	5639	XKRX	402415	4.70253	0	0			AGR2	10551	UPB1	51733	C6orf201	404220	4.7028	0	0
AGR2	10551	MBNL1	4154	PRRG2	5639	4.6956	3.85577	0			AGR2	10551	PRRG2	5639	XKRX	402415	4.70253	0	0
AGR2	10551	S100A3	6274	WDR78	79819	4.69507	0	0			AGR2	10551	MBNL1	4154	PRRG2	5639	4.6956	3.85577	0
AGR2	10551	AGR2	10551	ZDHHC18	84243	4.69416	0	0			AGR2	10551	S100A3	6274	WDR78	79819	4.69507	0	0
AGR2	10551	HMGCS2	3158	MRPS18B	28973	4.68875	0	0			AGR2	10551	AGR2	10551	ZDHHC18	84243	4.69416	0	0
AGR2	10551	TBX3	6926	OR5B12	390191	4.68653	0	0			AGR2	10551	HMGCS2	3158	MRPS18B	28973	4.68875	0	0
AGR2	10551	DFFA	1676	CCL25	6370	4.68421	0	0			AGR2	10551	TBX3	6926	OR5B12	390191	4.68653	0	0
AGR2	10551	CA8	767	ERN2	10595	4.68243	0.628058	0			AGR2	10551	DFFA	1676	CCL25	6370	4.68421	0	0
AGR2	10551	MRPS18B	28973	EFCAB1	79645	4.68136	0	0			AGR2	10551	CA8	767	ERN2	10595	4.68243	0.628058	0
AGR2	10551	PRRG2	5639	WFDC1	58189	4.68123	0	0			AGR2	10551	MRPS18B	28973	EFCAB1	79645	4.68136	0	0
AGR2	10551	PSMD2	5708	OR5B12	390191	4.67966	1.55243	0			AGR2	10551	PRRG2	5639	WFDC1	58189	4.68123	0	0
AGR2	10551	TEK	7010	REEP5	7905	4.67708	2.38804	0			AGR2	10551	PSMD2	5708	OR5B12	390191	4.67966	1.55243	0
AGR2	10551	GMDS	2762	EXOSC8	11340	4.67454	5.71534	0			AGR2	10551	TEK	7010	REEP5	7905	4.67708	2.38804	0
AGR2	10551	CCL25	6370	SHANK2	22941	4.67435	0	0			AGR2	10551	GMDS	2762	EXOSC8	11340	4.67454	5.71534	0
AGR2	10551	AGR2	10551	EXOSC8	11340	4.67252	0	0			AGR2	10551	CCL25	6370	SHANK2	22941	4.67435	0	0
AGR2	10551	SMOX	54498	MANEAL	149175	4.67227	0	0			AGR2	10551	AGR2	10551	EXOSC8	11340	4.67252	0	0
AGR2	10551	DFFA	1676	AGR2	10551	4.67057	0	0			AGR2	10551	SMOX	54498	MANEAL	149175	4.67227	0	0
AGR2	10551	REEP5	7905	C9orf26	90865	4.66624	3.15201	0			AGR2	10551	DFFA	1676	AGR2	10551	4.67057	0	0
AGR2	10551	AGR2	10551	IGSF22	283284	4.66621	0	0			AGR2	10551	REEP5	7905	C9orf26	90865	4.66624	3.15201	0
AGR2	10551	GMDS	2762	PCDHAC1	56135	4.66489	0	0			AGR2	10551	AGR2	10551	IGSF22	283284	4.66621	0	0
AGR2	10551	AGR2	10551	TBC1D24	57465	4.66483	0	0			AGR2	10551	GMDS	2762	PCDHAC1	56135	4.66489	0	0
AGR2	10551	MRPS18B	28973	MANEAL	149175	4.6645	1.53309	0			AGR2	10551	AGR2	10551	TBC1D24	57465	4.66483	0	0
AGR2	10551	PSAT1	29968	LOC148709	148709	4.66331	0.24649	0			AGR2	10551	MRPS18B	28973	MANEAL	149175	4.6645	1.53309	0
AGR2	10551	WNT11	7481	LRRC18	474354	4.66133	0	0			AGR2	10551	PSAT1	29968	LOC148709	148709	4.66331	0.24649	0
AGR2	10551	MRPS31	10240	ERN2	10595	4.65994	0	0			AGR2	10551	WNT11	7481	LRRC18	474354	4.66133	0	0
AGR2	10551	PRRG2	5639	UPB1	51733	4.65977	0.507079	0			AGR2	10551	MRPS31	10240	ERN2	10595	4.65994	0	0
AGR2	10551	EFEMP1	2202	KCNE1	3753	4.65823	0	0			AGR2	10551	PRRG2	5639	UPB1	51733	4.65977	0.507079	0
AGR2	10551	RCC1	1104	LOC148709	148709	4.6562	0	0			AGR2	10551	EFEMP1	2202	KCNE1	3753	4.65823	0	0
AGR2	10551	HSP90AB1	3326	LOC402221	402221	4.6516	0	0			AGR2	10551	RCC1	1104	LOC148709	148709	4.6562	0	0
AGR2	10551	DFFA	1676	DLL4	54567	4.65119	0	0			AGR2	10551	HSP90AB1	3326	LOC402221	402221	4.6516	0	0
AGR2	10551	EFEMP1	2202	THSD1	55901	4.64801	0.531866	0			AGR2	10551	DFFA	1676	DLL4	54567	4.65119	0	0
AGR2	10551	CASP10	843	KCNK3	3777	4.64674	0	0			AGR2	10551	EFEMP1	2202	THSD1	55901	4.64801	0.531866	0
AGR2	10551	VIP	7432	BAALC	79870	4.64587	0	0			AGR2	10551	CASP10	843	KCNK3	3777	4.64674	0	0
AGR2	10551	ASAH1	427	PCDHA3	56145	4.64154	0	0			AGR2	10551	VIP	7432	BAALC	79870	4.64587	0	0
AGR2	10551	KCNK3	3777	OSBPL2	9885	4.63413	0	0			AGR2	10551	ASAH1	427	PCDHA3	56145	4.64154	0	0
AGR2	10551	AGR2	10551	LOC148709	148709	4.63222	0	0			AGR2	10551	KCNK3	3777	OSBPL2	9885	4.63413	0	0
AGR2	10551	PTPRB	5787	WDR63	126820	4.63085	0.30769	0			AGR2	10551	AGR2	10551	LOC148709	148709	4.63222	0	0
AGR2	10551	SRM	6723	YARS	8565	4.63052	0.231176	0			AGR2	10551	PTPRB	5787	WDR63	126820	4.63085	0.30769	0
AGR2	10551	HSP90AB1	3326	MMRN2	79812	4.6273	0	0			AGR2	10551	SRM	6723	YARS	8565	4.63052	0.231176	0
AGR2	10551	MUC5AC	4586	NME5	8382	4.62276	2.57406	0			AGR2	10551	HSP90AB1	3326	MMRN2	79812	4.6273	0	0
AGR2	10551	KCNE1	3753	SPTY2D1	144108	4.62276	0	0			AGR2	10551	MUC5AC	4586	NME5	8382	4.62276	2.57406	0
AGR2	10551	PKHD1	5314	LOC148709	148709	4.62208	0.291004	0			AGR2	10551	KCNE1	3753	SPTY2D1	144108	4.62276	0	0
AGR2	10551	OSBPL2	9885	RNF141	50862	4.62183	0	0			AGR2	10551	PKHD1	5314	LOC148709	148709	4.62208	0.291004	0
AGR2	10551	PSAT1	29968	XKRX	402415	4.62074	0	0			AGR2	10551	OSBPL2	9885	RNF141	50862	4.62183	0	0
AGR2	10551	RPGR	6103	BAALC	79870	4.62005	2.92377	0			AGR2	10551	PSAT1	29968	XKRX	402415	4.62074	0	0
AGR2	10551	GMDS	2762	MBNL1	4154	4.62002	0.00543338	0			AGR2	10551	RPGR	6103	BAALC	79870	4.62005	2.92377	0
AGR2	10551	ATAD2	29028	KLHL4	56062	4.61713	2.19887	0			AGR2	10551	GMDS	2762	MBNL1	4154	4.62002	0.00543338	0
AGR2	10551	AGR2	10551	SPDEF	25803	4.61459	1.77783	0			AGR2	10551	ATAD2	29028	KLHL4	56062	4.61713	2.19887	0
AGR2	10551	PRRG1	5638	AGR2	10551	4.61448	0	0			AGR2	10551	AGR2	10551	SPDEF	25803	4.61459	1.77783	0
AGR2	10551	ARMC4	55130	LOC402221	402221	4.61248	0	0			AGR2	10551	PRRG1	5638	AGR2	10551	4.61448	0	0
AGR2	10551	ECHS1	1892	WDR63	126820	4.6114	0	0			AGR2	10551	ARMC4	55130	LOC402221	402221	4.61248	0	0
AGR2	10551	SLPI	6590	HKDC1	80201	4.61129	0	0			AGR2	10551	ECHS1	1892	WDR63	126820	4.6114	0	0
AGR2	10551	POLB	5423	ACP6	51205	4.61051	0	0			AGR2	10551	SLPI	6590	HKDC1	80201	4.61129	0	0
AGR2	10551	PDE5A	8654	ADCY4	196883	4.61004	0.80456	0			AGR2	10551	POLB	5423	ACP6	51205	4.61051	0	0
AGR2	10551	CA4	762	ACP6	51205	4.60816	0	0			AGR2	10551	PDE5A	8654	ADCY4	196883	4.61004	0.80456	0
AGR2	10551	FAM107A	11170	OR5B12	390191	4.60801	0	0			AGR2	10551	CA4	762	ACP6	51205	4.60816	0	0
AGR2	10551	YARS	8565	MRPS31	10240	4.60629	0	0			AGR2	10551	FAM107A	11170	OR5B12	390191	4.60801	0	0
AGR2	10551	DFFA	1676	SMOX	54498	4.60622	0	0			AGR2	10551	YARS	8565	MRPS31	10240	4.60629	0	0
AGR2	10551	AGR2	10551	ZDHHC3	51304	4.60498	0	0			AGR2	10551	DFFA	1676	SMOX	54498	4.60622	0	0
AGR2	10551	CASP10	843	YARS	8565	4.60437	0.367203	0			AGR2	10551	AGR2	10551	ZDHHC3	51304	4.60498	0	0
AGR2	10551	ERN2	10595	BAALC	79870	4.60115	0	0			AGR2	10551	CASP10	843	YARS	8565	4.60437	0.367203	0
AGR2	10551	PKHD1	5314	FAM83E	54854	4.60069	0.594877	0			AGR2	10551	ERN2	10595	BAALC	79870	4.60115	0	0
AGR2	10551	NME5	8382	TRAFD1	10906	4.60032	0	0			AGR2	10551	PKHD1	5314	FAM83E	54854	4.60069	0.594877	0
AGR2	10551	REEP5	7905	SHANK2	22941	4.60027	4.2233	0			AGR2	10551	NME5	8382	TRAFD1	10906	4.60032	0	0
AGR2	10551	REEP5	7905	NME5	8382	4.60021	0	0			AGR2	10551	REEP5	7905	SHANK2	22941	4.60027	4.2233	0
AGR2	10551	CA4	762	DLL4	54567	4.59967	0	0			AGR2	10551	REEP5	7905	NME5	8382	4.60021	0	0
AGR2	10551	BDKRB2	624	CUEDC2	79004	4.59768	0	0			AGR2	10551	CA4	762	DLL4	54567	4.59967	0	0
AGR2	10551	FOXA3	3171	ADCY4	196883	4.59744	0.30673	0			AGR2	10551	BDKRB2	624	CUEDC2	79004	4.59768	0	0
AGR2	10551	OSBPL2	9885	XKRX	402415	4.59677	0	0			AGR2	10551	FOXA3	3171	ADCY4	196883	4.59744	0.30673	0
AGR2	10551	GMDS	2762	PTPRB	5787	4.59523	0.784575	0			AGR2	10551	OSBPL2	9885	XKRX	402415	4.59677	0	0
AGR2	10551	ID1	3397	STUB1	10273	4.59358	0	0			AGR2	10551	GMDS	2762	PTPRB	5787	4.59523	0.784575	0
AGR2	10551	RAVER2	55225	KIF12	113220	4.5935	0	0			AGR2	10551	ID1	3397	STUB1	10273	4.59358	0	0
AGR2	10551	MGC11266	79172	ADCY4	196883	4.59036	2.45958	0			AGR2	10551	RAVER2	55225	KIF12	113220	4.5935	0	0
AGR2	10551	NME5	8382	RNPS1	10921	4.5895	0.0395293	0			AGR2	10551	MGC11266	79172	ADCY4	196883	4.59036	2.45958	0
AGR2	10551	CA8	767	POLB	5423	4.58804	0	0			AGR2	10551	NME5	8382	RNPS1	10921	4.5895	0.0395293	0
AGR2	10551	DBH	1621	HIST1H1B	3009	4.58481	0	0			AGR2	10551	CA8	767	POLB	5423	4.58804	0	0
AGR2	10551	PKHD1	5314	AGR2	10551	4.58197	0	0			AGR2	10551	DBH	1621	HIST1H1B	3009	4.58481	0	0
AGR2	10551	DBH	1621	PTPRB	5787	4.58162	0.366149	0			AGR2	10551	PKHD1	5314	AGR2	10551	4.58197	0	0
AGR2	10551	NME5	8382	C15orf26	161502	4.57888	9.24838	0			AGR2	10551	DBH	1621	PTPRB	5787	4.58162	0.366149	0
AGR2	10551	UPB1	51733	WFDC1	58189	4.57828	0	0			AGR2	10551	NME5	8382	C15orf26	161502	4.57888	9.24838	0
AGR2	10551	PRRG1	5638	TEK	7010	4.57568	8.24884	0			AGR2	10551	UPB1	51733	WFDC1	58189	4.57828	0	0
AGR2	10551	FOXA3	3171	STARD7	56910	4.57403	0	0			AGR2	10551	PRRG1	5638	TEK	7010	4.57568	8.24884	0
AGR2	10551	P2RY4	5030	LOC148709	148709	4.57364	0	0			AGR2	10551	FOXA3	3171	STARD7	56910	4.57403	0	0
AGR2	10551	ERN2	10595	C15orf26	161502	4.5689	0.917321	0			AGR2	10551	P2RY4	5030	LOC148709	148709	4.57364	0	0
AGR2	10551	ALB	213	THSD1	55901	4.56627	4.55696	0			AGR2	10551	ERN2	10595	C15orf26	161502	4.5689	0.917321	0
AGR2	10551	DLL4	54567	LOC148709	148709	4.55575	0	0			AGR2	10551	ALB	213	THSD1	55901	4.56627	4.55696	0
AGR2	10551	PSMD2	5708	MMRN2	79812	4.55478	0	0			AGR2	10551	DLL4	54567	LOC148709	148709	4.55575	0	0
AGR2	10551	ZDHHC18	84243	MANEAL	149175	4.55123	0	0			AGR2	10551	PSMD2	5708	MMRN2	79812	4.55478	0	0
AGR2	10551	PRRG1	5638	TMOD3	29766	4.54873	0	0			AGR2	10551	ZDHHC18	84243	MANEAL	149175	4.55123	0	0
AGR2	10551	STX1A	6804	C15orf26	161502	4.54364	0	0			AGR2	10551	PRRG1	5638	TMOD3	29766	4.54873	0	0
AGR2	10551	ANP32A	8125	C9orf26	90865	4.54216	0	0			AGR2	10551	STX1A	6804	C15orf26	161502	4.54364	0	0
AGR2	10551	AGR2	10551	RAPGEF6	51735	4.54101	0	0			AGR2	10551	ANP32A	8125	C9orf26	90865	4.54216	0	0
AGR2	10551	MCC	4163	PANX2	56666	4.54064	0.76392	0			AGR2	10551	AGR2	10551	RAPGEF6	51735	4.54101	0	0
AGR2	10551	ALB	213	BAALC	79870	4.53873	2.43118	0			AGR2	10551	MCC	4163	PANX2	56666	4.54064	0.76392	0
AGR2	10551	HLA-DRB4	3126	RPGR	6103	4.53376	0	0			AGR2	10551	ALB	213	BAALC	79870	4.53873	2.43118	0
AGR2	10551	CASP10	843	MGC11266	79172	4.53278	3.17162	0			AGR2	10551	HLA-DRB4	3126	RPGR	6103	4.53376	0	0
AGR2	10551	HMGCS2	3158	PCDHAC1	56135	4.53173	0	0			AGR2	10551	CASP10	843	MGC11266	79172	4.53278	3.17162	0
AGR2	10551	GNAT1	2779	HIST1H1B	3009	4.52952	0.446048	0			AGR2	10551	HMGCS2	3158	PCDHAC1	56135	4.53173	0	0
AGR2	10551	THSD1	55901	OR5B12	390191	4.52896	0	0			AGR2	10551	GNAT1	2779	HIST1H1B	3009	4.52952	0.446048	0
AGR2	10551	ABL1	25	OSBPL2	9885	4.52701	0	0			AGR2	10551	THSD1	55901	OR5B12	390191	4.52896	0	0
AGR2	10551	HPD	3242	AGR2	10551	4.52669	0.553719	0			AGR2	10551	ABL1	25	OSBPL2	9885	4.52701	0	0
AGR2	10551	EFEMP1	2202	PTPRB	5787	4.52605	0	0			AGR2	10551	HPD	3242	AGR2	10551	4.52669	0.553719	0
AGR2	10551	ID1	3397	MUC5AC	4586	4.52533	1.05783	0			AGR2	10551	EFEMP1	2202	PTPRB	5787	4.52605	0	0
AGR2	10551	CA4	762	SHANK2	22941	4.52333	0	0			AGR2	10551	ID1	3397	MUC5AC	4586	4.52533	1.05783	0
AGR2	10551	MRPS18B	28973	DOCK5	80005	4.52236	0	0			AGR2	10551	CA4	762	SHANK2	22941	4.52333	0	0
AGR2	10551	TRAFD1	10906	MGC13040	85016	4.51802	0.508497	0			AGR2	10551	MRPS18B	28973	DOCK5	80005	4.52236	0	0
AGR2	10551	ANP32A	8125	RNPS1	10921	4.51738	5.3555	0			AGR2	10551	TRAFD1	10906	MGC13040	85016	4.51802	0.508497	0
AGR2	10551	DFFA	1676	TEK	7010	4.51515	2.16171	0			AGR2	10551	ANP32A	8125	RNPS1	10921	4.51738	5.3555	0
AGR2	10551	STX1A	6804	IER3	8870	4.51325	0.298358	0			AGR2	10551	DFFA	1676	TEK	7010	4.51515	2.16171	0
AGR2	10551	POLB	5423	ANP32A	8125	4.50733	0.903057	0			AGR2	10551	STX1A	6804	IER3	8870	4.51325	0.298358	0
AGR2	10551	RCC1	1104	ITLN2	142683	4.50516	0	0			AGR2	10551	POLB	5423	ANP32A	8125	4.50733	0.903057	0
AGR2	10551	KCNE1	3753	HKDC1	80201	4.50404	0	0			AGR2	10551	RCC1	1104	ITLN2	142683	4.50516	0	0
AGR2	10551	ID1	3397	WNT11	7481	4.50214	0	0			AGR2	10551	KCNE1	3753	HKDC1	80201	4.50404	0	0
AGR2	10551	BDKRB2	624	MBNL1	4154	4.50113	0.88652	0			AGR2	10551	ID1	3397	WNT11	7481	4.50214	0	0
AGR2	10551	WFDC1	58189	WDR78	79819	4.49985	0.486831	0			AGR2	10551	BDKRB2	624	MBNL1	4154	4.50113	0.88652	0
AGR2	10551	VIP	7432	MGC11266	79172	4.49373	0	0			AGR2	10551	WFDC1	58189	WDR78	79819	4.49985	0.486831	0
AGR2	10551	HSP90AB1	3326	DOCK5	80005	4.4918	1.1864	0			AGR2	10551	VIP	7432	MGC11266	79172	4.49373	0	0
AGR2	10551	PKHD1	5314	KIF12	113220	4.49158	0.256148	0			AGR2	10551	HSP90AB1	3326	DOCK5	80005	4.4918	1.1864	0
AGR2	10551	FAM83E	54854	LRRC18	474354	4.49104	0	0			AGR2	10551	PKHD1	5314	KIF12	113220	4.49158	0.256148	0
AGR2	10551	PTPRB	5787	TMOD3	29766	4.49043	0	0			AGR2	10551	FAM83E	54854	LRRC18	474354	4.49104	0	0
AGR2	10551	ITLN1	55600	ADCY4	196883	4.48937	3.97177	0			AGR2	10551	PTPRB	5787	TMOD3	29766	4.49043	0	0
AGR2	10551	CASP10	843	DLL4	54567	4.48789	0	0			AGR2	10551	ITLN1	55600	ADCY4	196883	4.48937	3.97177	0
AGR2	10551	HIST1H1B	3009	RNPS1	10921	4.48677	1.06619	0			AGR2	10551	CASP10	843	DLL4	54567	4.48789	0	0
AGR2	10551	RNPS1	10921	ZDHHC18	84243	4.48588	0.990201	0			AGR2	10551	HIST1H1B	3009	RNPS1	10921	4.48677	1.06619	0
AGR2	10551	ABL1	25	CA4	762	4.4808	1.48518	0			AGR2	10551	RNPS1	10921	ZDHHC18	84243	4.48588	0.990201	0
AGR2	10551	CASP10	843	ZDHHC3	51304	4.47984	0	0			AGR2	10551	ABL1	25	CA4	762	4.4808	1.48518	0
AGR2	10551	PRRG2	5639	ACP6	51205	4.4782	1.84309	0			AGR2	10551	CASP10	843	ZDHHC3	51304	4.47984	0	0
AGR2	10551	RCC1	1104	FOXA3	3171	4.47459	0.382005	0			AGR2	10551	PRRG2	5639	ACP6	51205	4.4782	1.84309	0
AGR2	10551	KCNE1	3753	FAM107A	11170	4.47458	0	0			AGR2	10551	RCC1	1104	FOXA3	3171	4.47459	0.382005	0
AGR2	10551	CCL25	6370	MGC11266	79172	4.47116	0	0			AGR2	10551	KCNE1	3753	FAM107A	11170	4.47458	0	0
AGR2	10551	EXOSC8	11340	ATAD2	29028	4.46366	0	0			AGR2	10551	CCL25	6370	MGC11266	79172	4.47116	0	0
AGR2	10551	JAM2	58494	CYYR1	116159	29.3348	1.37849	0			AGR2	10551	EXOSC8	11340	ATAD2	29028	4.46366	0	0
AGR2	10551	NR5A2	2494	ITLN2	142683	22.7662	0.142292	0			ARL14	80117	FUT2	2524	PTPRH	5794	16.3433	2.14342	0
AGR2	10551	HYDIN	54768	MGC13040	85016	21.1481	7.84642	0			ARL14	80117	TCN1	6947	PLEK2	26499	14.0395	0	0
AGR2	10551	LDB2	9079	CYYR1	116159	20.4634	6.11243	0			ARL14	80117	FUT2	2524	PRSS3	5646	12.9043	0	0.139791
AGR2	10551	HYDIN	54768	C9orf116	138162	20.253	6.74987	0			ARL14	80117	APOBEC1	339	GPA33	10223	12.3946	0	0.780355
AGR2	10551	LDB2	9079	JAM2	58494	19.8792	1.72372	0			ARL14	80117	PRSS3	5646	C1orf106	55765	12.3839	0	0
AGR2	10551	UGT8	7368	PCDHAC1	56135	19.5741	0.108853	0			ARL14	80117	APOBEC1	339	PRSS3	5646	11.9383	0.0351029	0
AGR2	10551	SPTBN1	6711	SLC44A4	80736	19.2964	0.904141	0			ARL14	80117	TCN1	6947	C1orf106	55765	11.7532	0	0
AGR2	10551	FCN3	8547	PCDH17	27253	18.9885	1.68717	0			ARL14	80117	PRSS3	5646	TRIM15	89870	11.4351	0.519375	0
AGR2	10551	SNRPA	6626	BACE1	23621	18.2978	1.58173	0			ARL14	80117	APOBEC1	339	FUT2	2524	11.2425	0	0.258396
AGR2	10551	CA4	762	NR5A2	2494	18.2222	0.239488	0			ARL14	80117	APOBEC1	339	TRIM15	89870	11.0389	0	3.99199
AGR2	10551	TEK	7010	CYYR1	116159	18.0053	4.39876	0			ARL14	80117	GPA33	10223	PLA2G2F	64600	10.8878	0	0.304799
AGR2	10551	LDB2	9079	SNRK	54861	17.9604	3.9922	0			ARL14	80117	RBP4	5950	PLA2G2F	64600	10.7973	3.07753	0
AGR2	10551	CD36	948	ITLN2	142683	17.7902	0	0			ARL14	80117	APOBEC1	339	PTPRH	5794	10.7784	0	5.23486
AGR2	10551	LRRC46	90506	C9orf116	138162	17.7421	13.1195	0			ARL14	80117	GPA33	10223	TRIM15	89870	10.7747	0	2.14102
AGR2	10551	CD36	948	PTPRN2	5799	17.3578	0	0			ARL14	80117	PTPRH	5794	GPA33	10223	10.6741	0	0.899209
AGR2	10551	ST6GALNAC1	55808	SPTY2D1	144108	16.9761	0	0			ARL14	80117	C1orf106	55765	TRIM15	89870	10.5193	1.22715	0
AGR2	10551	SNRK	54861	JAM2	58494	16.7682	0	0			ARL14	80117	FUT2	2524	LCN2	3934	10.2877	5.72251	2.92706
AGR2	10551	NR5A2	2494	ITLN1	55600	16.5323	0	0			ARL14	80117	GPA33	10223	CDC42EP2	10435	9.92598	0.473407	0
AGR2	10551	CA2	760	TEK	7010	16.4017	4.47201	0			ARL14	80117	FUT2	2524	GPA33	10223	9.87279	0	0
AGR2	10551	TEK	7010	LDB2	9079	16.2594	8.38348	0			ARL14	80117	RBP4	5950	ARL14	80117	9.75922	0	1.33124
AGR2	10551	PPP2R2A	5520	R3HCC1	203069	16.0613	0	0			ARL14	80117	CDC42EP2	10435	PLA2G2F	64600	9.69615	0.880896	0
AGR2	10551	ELP3	55140	R3HCC1	203069	15.8991	0	0			ARL14	80117	APOBEC1	339	PLA2G2F	64600	9.50879	0.861581	0
AGR2	10551	KCNK3	3777	PCDH17	27253	15.5664	2.89149	0			ARL14	80117	FUT2	2524	TCN1	6947	9.46899	0	0.215171
AGR2	10551	PSMF1	9491	ELP3	55140	15.1142	4.94298	0			ARL14	80117	APOBEC1	339	ARL14	80117	9.38015	0.00485545	0
AGR2	10551	EIF4G1	1981	LPHN2	23266	15.0182	0	0			ARL14	80117	PTPRH	5794	TRIM15	89870	9.37801	0	3.20994
AGR2	10551	CORO2A	7464	C14orf105	55195	14.9956	0.419515	0			ARL14	80117	FUT2	2524	TRIM15	89870	9.28539	0	0.121482
AGR2	10551	ENTPD2	954	DOCK5	80005	14.81	0	0			ARL14	80117	TCN1	6947	TRIM15	89870	9.26302	0	2.12791
AGR2	10551	BCHE	590	LDB2	9079	14.7839	2.86999	0			ARL14	80117	LCN2	3934	PTPRH	5794	9.15346	0	1.80966
AGR2	10551	GSTA5	221357	LRRC18	474354	14.6417	3.63306	0			ARL14	80117	FUT2	2524	C1orf106	55765	9.03067	3.47625	0
AGR2	10551	SOX9	6662	UGT8	7368	14.544	3.71891	0			ARL14	80117	PLEK2	26499	C1orf106	55765	8.85303	0	2.87141
AGR2	10551	HPGD	3248	SPDEF	25803	14.5088	0	0			ARL14	80117	CDC42EP2	10435	TRIM15	89870	8.81738	0	0
AGR2	10551	EXOSC8	11340	KLC2	64837	14.2379	0	0			ARL14	80117	FSHR	2492	TRIM31	11074	8.70365	0	1.49269
AGR2	10551	TEK	7010	JAM2	58494	13.9813	3.01009	0			ARL14	80117	APOBEC1	339	RBP4	5950	8.47449	0	0
AGR2	10551	SNRK	54861	CYYR1	116159	13.9486	8.44543	0			ARL14	80117	FSHR	2492	RBP4	5950	8.46486	0	0
AGR2	10551	DACH1	1602	CYYR1	116159	13.7849	0	0			ARL14	80117	PRSS3	5646	TCN1	6947	8.44807	0.670317	1.00909
AGR2	10551	EDIL3	10085	WDR78	79819	13.7584	0	0			ARL14	80117	APOBEC1	339	C1orf106	55765	8.43069	0	0
AGR2	10551	LDB2	9079	C9orf26	90865	13.7054	7.59588	0			ARL14	80117	FUT2	2524	PLEK2	26499	8.3854	0	0.899919
AGR2	10551	ENTPD2	954	BAIAP2L2	80115	13.5649	0	0			ARL14	80117	PLA2G2F	64600	ARL14	80117	8.30311	0.149778	0
AGR2	10551	SPTBN1	6711	WDR63	126820	13.4256	0	0			ARL14	80117	PRSS3	5646	PTPRH	5794	8.1831	0.391002	1.87494
AGR2	10551	MRPS31	10240	PYCRL	65263	13.4237	0	0			ARL14	80117	PRSS3	5646	GPA33	10223	8.07697	0	0
AGR2	10551	PTPRB	5787	LDB2	9079	13.1925	2.01378	0			ARL14	80117	CDC42EP2	10435	C1orf106	55765	8.06639	0	0
AGR2	10551	DACH1	1602	MUC5AC	4586	13.1646	0	0			ARL14	80117	APOBEC1	339	CDC42EP2	10435	7.99365	0	0.534647
AGR2	10551	HOXC6	3223	SNRPA	6626	13.069	0	0			ARL14	80117	LCN2	3934	GPA33	10223	7.99109	2.65734	0
AGR2	10551	SHANK2	22941	GPRC5C	55890	12.9648	0.651267	0			ARL14	80117	PTPRH	5794	TCN1	6947	7.97719	0	3.45876
AGR2	10551	LDB2	9079	LPHN2	23266	12.9372	8.89801	0			ARL14	80117	APOBEC1	339	TCN1	6947	7.84572	0	3.72955
AGR2	10551	UGT2B10	7365	LRRC46	90506	12.9202	0	0			ARL14	80117	GPA33	10223	C1orf106	55765	7.72881	0.11277	0.793413
AGR2	10551	PSMD2	5708	SNX17	9784	12.8781	1.79388	0			ARL14	80117	C1orf106	55765	PLA2G2F	64600	7.68886	1.41028	0.0810812
AGR2	10551	PSMF1	9491	R3HCC1	203069	12.8585	0	0			ARL14	80117	B4GALT4	8702	MRPS24	64951	7.65722	1.30665	0
AGR2	10551	SNRPA	6626	SLC35A1	10559	12.7473	2.35869	0			ARL14	80117	RBP4	5950	GPA33	10223	7.65686	1.12244	0
AGR2	10551	KCNE1	3753	VPS37B	79720	12.7391	0	0			ARL14	80117	TRIM31	11074	ARL14	80117	7.49609	1.00366	0
AGR2	10551	STX1A	6804	CLMN	79789	12.7319	1.0286	0			ARL14	80117	PRSS3	5646	PLA2G2F	64600	7.29838	0	0
AGR2	10551	LDB2	9079	FAM107A	11170	12.6164	0.165235	0			ARL14	80117	RBP4	5950	CDC42EP2	10435	7.26092	0	0
AGR2	10551	CA2	760	C9orf26	90865	12.6068	1.73062	0			ARL14	80117	PLA2G2F	64600	TRIM15	89870	7.21773	0.959843	0
AGR2	10551	DACH1	1602	JAM2	58494	12.4818	0	0			ARL14	80117	GPA33	10223	ARL14	80117	6.91021	0.823539	0
AGR2	10551	PKHD1	5314	PRDM7	11105	12.4702	0	0			ARL14	80117	RBP4	5950	CYTL1	54360	6.8743	0	0
AGR2	10551	CLPTM1	1209	KLC2	64837	12.4702	0	0			ARL14	80117	APOBEC1	339	FSHR	2492	6.7175	0	1.8799
AGR2	10551	GMDS	2762	BACE2	25825	12.4683	1.03813	0			ARL14	80117	TRIM31	11074	STYK1	55359	6.69043	1.76636	0
AGR2	10551	TOMM70A	9868	CMYA5	202333	12.3423	0	0			ARL14	80117	APOBEC1	339	LCN2	3934	6.61442	0	0
AGR2	10551	CA2	760	ITLN2	142683	12.3319	0	0			ARL14	80117	APOBEC1	339	TRIM31	11074	6.59045	0	0.958314
AGR2	10551	CA8	767	WDR60	55112	12.3189	0	0			ARL14	80117	MITF	4286	PLEK2	26499	6.5886	0	0
AGR2	10551	DBH	1621	HOXC6	3223	12.2798	4.9483	0			ARL14	80117	GPA33	10223	TRIM31	11074	6.50588	1.11009	1.29377
AGR2	10551	NR5A2	2494	C9orf26	90865	12.2654	0.871974	0			ARL14	80117	PLEK2	26499	ARL14	80117	6.44798	0	0.364416
AGR2	10551	DFFA	1676	VPS37B	79720	12.1914	0	0			ARL14	80117	B4GALT4	8702	ARL14	80117	6.37953	0	1.02544
AGR2	10551	EIF4G1	1981	PSMD2	5708	12.1621	0	0			ARL14	80117	FSHR	2492	PLA2G2F	64600	6.30704	0	0.451593
AGR2	10551	MAN2B1	4125	GPRC5C	55890	12.1295	0	0			ARL14	80117	PRSS3	5646	PLEK2	26499	6.29193	0.338068	0.11606
AGR2	10551	PSMD11	5717	DDO	8528	12.1101	0	0			ARL14	80117	APOBEC1	339	PLEK2	26499	6.2865	0	0
AGR2	10551	CAPS	828	LRRC46	90506	12.1078	12.264	0			ARL14	80117	LCN2	3934	CDC42EP2	10435	6.21374	0	0
AGR2	10551	HSP90AB1	3326	LAPTM4B	55353	11.9477	0	0			ARL14	80117	B4GALT4	8702	STYK1	55359	6.14458	0	0
AGR2	10551	ATAD2	29028	SUSD4	55061	11.9294	0	0			ARL14	80117	LCN2	3934	PLEK2	26499	6.07235	0	0
AGR2	10551	DACH1	1602	FCN3	8547	11.8786	0	0			ARL14	80117	TCN1	6947	GPA33	10223	5.94462	0	0.0569215
AGR2	10551	HYDIN	54768	LRRC46	90506	11.876	8.84322	0			ARL14	80117	PTPRH	5794	PLEK2	26499	5.90807	0.406339	0
AGR2	10551	ZNF646	9726	KLC2	64837	11.8376	0	0			ARL14	80117	MYH4	4622	RBP4	5950	5.88697	3.19034	0
AGR2	10551	CLPTM1	1209	ZNF646	9726	11.836	0	0			ARL14	80117	H2AFX	3014	ARL14	80117	5.8327	0	0.184428
AGR2	10551	EFNB2	1948	EFHB	151651	11.8346	0	0			ARL14	80117	FUT2	2524	CDC42EP2	10435	5.75346	1.86849	0
AGR2	10551	REEP5	7905	FZD4	8322	11.8125	2.26708	0			ARL14	80117	LCN2	3934	TRIM15	89870	5.73422	0.799908	0
AGR2	10551	EFNB2	1948	SNRPA	6626	11.8112	5.16746	0			ARL14	80117	STYK1	55359	ARL14	80117	5.65946	0	0
AGR2	10551	EFEMP1	2202	HPGD	3248	11.7231	0.658116	0			ARL14	80117	CDC42EP2	10435	ARL14	80117	5.55694	0	2.31037
AGR2	10551	NR5A2	2494	SPAG6	9576	11.6945	0.722836	0			ARL14	80117	PTPRH	5794	C1orf106	55765	5.54041	0	0
AGR2	10551	FAM107A	11170	CYYR1	116159	11.5964	0	0			ARL14	80117	TCN1	6947	ARL14	80117	5.47054	0	0
AGR2	10551	SMARCA4	6597	BACE1	23621	11.5758	0.438867	0			ARL14	80117	MITF	4286	ARL14	80117	5.45094	2.30876	0.578669
AGR2	10551	TEK	7010	CD300LG	146894	11.5738	0	0			ARL14	80117	LCN2	3934	PLS1	5357	5.43363	0.29691	0
AGR2	10551	CBX4	8535	WDR63	126820	11.5635	2.59628	0			ARL14	80117	C1orf106	55765	ARL14	80117	5.42636	0	0
AGR2	10551	NME5	8382	FBXO15	201456	11.5407	14.3071	0			ARL14	80117	FSHR	2492	ARL14	80117	5.42114	0	0
AGR2	10551	ENTPD2	954	MUC5AC	4586	11.5095	0	0			ARL14	80117	LCN2	3934	TCN1	6947	5.41614	0	0
AGR2	10551	TK1	7083	XKRX	402415	11.4231	1.40549	0			ARL14	80117	PRSS3	5646	ARL14	80117	5.38863	0	0.412321
AGR2	10551	LDB2	9079	AK3	50808	11.4102	2.79352	0			ARL14	80117	PRSS3	5646	CDC42EP2	10435	5.38779	1.24709	0
AGR2	10551	PLA2G5	5322	TBX3	6926	11.355	0	0			ARL14	80117	APOBEC1	339	CYTL1	54360	5.31988	0	0.182813
AGR2	10551	IPO9	55705	C15orf26	161502	11.2852	0	0			ARL14	80117	CDC42EP2	10435	CYTL1	54360	5.31735	0	0
AGR2	10551	JAM2	58494	GSTA5	221357	11.2362	0.823408	0			ARL14	80117	PTPRH	5794	CDC42EP2	10435	5.2842	0	0
AGR2	10551	LPHN2	23266	SNRK	54861	11.1218	3.00471	0			ARL14	80117	TCN1	6947	CDC42EP2	10435	5.23793	0	0
AGR2	10551	CYYR1	116159	LRRC18	474354	11.1139	0.532517	0			ARL14	80117	ARL14	80117	TRIM15	89870	5.22515	0	0
AGR2	10551	TLE3	7090	DYNC2H1	79659	11.1098	0.927945	0			ARL14	80117	PTPRH	5794	TRIM31	11074	5.21931	0	0.468408
AGR2	10551	SMOX	54498	LRRC46	90506	11.0887	0	0			ARL14	80117	LCN2	3934	PRSS3	5646	5.15087	0	1.37152
AGR2	10551	TK1	7083	OR5B12	390191	11.0613	0	0			ARL14	80117	FUT2	2524	ARL14	80117	5.09374	0	0
AGR2	10551	KPNA1	3836	PYCRL	65263	11.0515	0.863853	0			ARL14	80117	CDC42EP2	10435	PLEK2	26499	5.0352	0	1.01998
AGR2	10551	DLX4	1748	PSAT1	29968	11.0398	0	0			ARL14	80117	MITF	4286	STYK1	55359	4.96334	1.42197	0
AGR2	10551	MUC5AC	4586	BAIAP2L2	80115	11.0211	0	0			ARL14	80117	MYH4	4622	ARL14	80117	4.94638	0	1.47416
AGR2	10551	DACH1	1602	TEK	7010	11.013	0.0802097	0			ARL14	80117	GPA33	10223	PLEK2	26499	4.92822	0.346645	0
AGR2	10551	EIF4G1	1981	RBM25	58517	10.9713	1.04451	0			ARL14	80117	TRIM31	11074	PLA2G2F	64600	4.90909	0	0
AGR2	10551	MAOB	4129	AK3	50808	10.958	0	0			ARL14	80117	PLEK2	26499	TRIM15	89870	4.86925	0.84476	0
AGR2	10551	BMPR1A	657	GTF3C2	2976	10.9341	0.867071	0			ARL14	80117	B4GALT4	8702	TRIM31	11074	4.86031	0	2.52188
AGR2	10551	AK3	50808	JAM2	58494	10.9124	0.402723	0			ARL14	80117	FUT2	2524	PLA2G2F	64600	4.84903	0.477995	1.12605
AGR2	10551	FAM83E	54854	CMYA5	202333	10.9121	2.00486	0			ARL14	80117	CYTL1	54360	ARL14	80117	4.81903	3.5522	0
AGR2	10551	GTF3C2	2976	RNF5	6048	10.9073	0	0			ARL14	80117	FSHR	2492	GPA33	10223	4.80356	0	0
AGR2	10551	CORO2A	7464	ZDHHC3	51304	10.8857	0	0			ARL14	80117	PLS1	5357	PTPRH	5794	4.75707	0	0
AGR2	10551	SMAD6	4091	ZDHHC3	51304	10.8849	0	0			ARL14	80117	LCN2	3934	C1orf106	55765	4.72878	3.59844	0
AGR2	10551	ACSL4	2182	AZI2	64343	10.8657	2.68432	0			ARL14	80117	LCN2	3934	ARL14	80117	4.70573	0	0.503149
AGR2	10551	PRRG1	5638	BAIAP2L2	80115	10.7916	0.113862	0			ARL14	80117	PLS1	5357	ARL14	80117	4.68259	0	0.699174
AGR2	10551	VIP	7432	FZD4	8322	10.786	1.69767	0			ARL14	80117	PTPRH	5794	ARL14	80117	4.65258	0	0
AGR2	10551	KPNA1	3836	KLC2	64837	10.7805	1.9239	0			ARL14	80117	B4GALT4	8702	PLA2G2F	64600	4.63809	0	0
AGR2	10551	CA2	760	DACH1	1602	10.7805	0	0			ARL14	80117	RBP4	5950	TRIM31	11074	4.60223	0	1.58203
AGR2	10551	ENTPD2	954	PRRG1	5638	10.7653	0	0			ARL14	80117	MRPS24	64951	ARL14	80117	4.57564	0	0
AGR2	10551	ID1	3397	PCDH17	27253	10.7248	0.179302	0			CDH13	1012	CDH13	1012	DUSP11	8446	9.76425	0	0
AGR2	10551	TK1	7083	SETD3	84193	10.6996	1.81006	0			CDH13	1012	NCK1	4690	DUSP11	8446	9.45559	0.931267	0
AGR2	10551	SMAD6	4091	PTPRN2	5799	10.6317	0	0			CDH13	1012	DUSP11	8446	ADAMDEC1	27299	9.45307	0	0
AGR2	10551	CA4	762	CD36	948	10.6256	2.07238	0			CDH13	1012	DUSP11	8446	ATP2C1	27032	9.45138	0	0
AGR2	10551	PCDH17	27253	SNRK	54861	10.625	0.905882	0			CDH13	1012	KIR2DL3	3804	ATP2C1	27032	9.25276	0	0
AGR2	10551	PLEKHF1	79156	DYNC2H1	79659	10.612	0	0			CDH13	1012	KIR2DL3	3804	ADAMDEC1	27299	9.16479	0	0
AGR2	10551	ERN2	10595	PAQR5	54852	10.6036	0.954279	0			CDH13	1012	CDH13	1012	ATP2C1	27032	9.12755	2.00661	0
AGR2	10551	ACSL4	2182	SMARCA4	6597	10.5923	0	0			CDH13	1012	CDH13	1012	PLCH2	9651	8.98489	0	0
AGR2	10551	HOXC6	3223	SLC35A1	10559	10.5393	0.678117	0			CDH13	1012	CDH13	1012	SEMA6A	57556	8.79165	1.85602	0
AGR2	10551	CA2	760	SNRK	54861	10.5218	0	0			CDH13	1012	NCK1	4690	ADAMDEC1	27299	8.77617	0	0
AGR2	10551	CORO2A	7464	YARS	8565	10.5185	0	0			CDH13	1012	KIR2DL3	3804	SELM	140606	8.75186	0.149463	0
AGR2	10551	RCC1	1104	NLGN4X	57502	10.5156	0.324707	0			CDH13	1012	CDH13	1012	EVPL	2125	8.30971	0	0
AGR2	10551	MBNL1	4154	LGI4	163175	10.5093	0	0			CDH13	1012	KIR2DL3	3804	SEMA6A	57556	7.58336	0.545251	0
AGR2	10551	FOXA3	3171	BAIAP2L2	80115	10.5034	0	0			CDH13	1012	CDH13	1012	KRT15	3866	7.05604	0	0
AGR2	10551	CUEDC2	79004	LRP5L	91355	10.4875	0	0			CDH13	1012	CDH13	1012	SELM	140606	6.99347	1.85309	0
AGR2	10551	HKDC1	80201	SLC44A4	80736	10.4666	0	0			CDH13	1012	CDH13	1012	NCK1	4690	6.96556	0.197086	0
AGR2	10551	DLL4	54567	LGI4	163175	10.4532	0.297734	0			CDH13	1012	DUSP11	8446	SEMA6A	57556	6.72163	0.546584	0
AGR2	10551	CA2	760	NR5A2	2494	10.4394	0	0			CDH13	1012	PLCH2	9651	SEMA6A	57556	6.27512	0	0
AGR2	10551	GNAT1	2779	GRHL2	79977	10.4312	0	0			CDH13	1012	ATP2C1	27032	SEMA6A	57556	6.12647	0	0
AGR2	10551	FGFR2	2263	MCC	4163	10.4215	0	0			CDH13	1012	ADAMDEC1	27299	SEMA6A	57556	5.95559	0	0
AGR2	10551	SMARCA4	6597	SNRPA	6626	10.4201	2.0965	0			CDH13	1012	CDH13	1012	ANAPC2	29882	5.88198	0	0
AGR2	10551	ASAH1	427	R3HCC1	203069	10.3947	0	0			CDH13	1012	KIR2DL3	3804	NCK1	4690	5.86189	0.0385715	0
AGR2	10551	HOXC6	3223	DYNC2H1	79659	10.3912	0	0			CDH13	1012	NCK1	4690	SEMA6A	57556	5.72844	0	0
AGR2	10551	FZD4	8322	CYYR1	116159	10.3437	5.15207	0			CDH13	1012	ATP2C1	27032	ANAPC2	29882	5.65637	2.79533	0
AGR2	10551	ENTPD2	954	SMOX	54498	10.338	0	0			CDH13	1012	EVPL	2125	DUSP11	8446	5.62499	0	0
AGR2	10551	AK3	50808	WFDC1	58189	10.3244	0.0315883	0			CDH13	1012	KRT15	3866	PLCH2	9651	5.58587	4.86339	0
AGR2	10551	SNRPA	6626	EFHB	151651	10.3013	0	0			CDH13	1012	KRT15	3866	SEMA6A	57556	5.49686	0	0
AGR2	10551	CKB	1152	RANBP17	64901	10.2804	0.0984319	0			CDH13	1012	CDH13	1012	KIR2DL3	3804	5.43344	0	0
AGR2	10551	LRRC46	90506	C15orf26	161502	10.2436	14.0955	0			CDH13	1012	KRT15	3866	ADAMDEC1	27299	5.38483	0.381094	0
AGR2	10551	TK1	7083	DLL4	54567	10.2414	0	0			CDH13	1012	CDH13	1012	ADAMDEC1	27299	5.26418	0	0
AGR2	10551	UPB1	51733	TBC1D20	128637	10.2308	3.76172	0			CDH13	1012	SEMA6A	57556	SELM	140606	5.21808	4.66696	0
AGR2	10551	HYDIN	54768	C15orf26	161502	10.2081	7.61009	0			CDH13	1012	DUSP11	8446	ANAPC2	29882	5.12238	0.0398942	0
AGR2	10551	C9orf26	90865	CYYR1	116159	10.1968	6.05866	0			CDH13	1012	NCK1	4690	ATP2C1	27032	5.06099	2.90525	0
AGR2	10551	MAN1B1	11253	GPRC5C	55890	10.1947	2.24449	0			CDH13	1012	ATP2C1	27032	ADAMDEC1	27299	4.99611	0	0
AGR2	10551	ANP32A	8125	SNX17	9784	10.1864	0	0			CDH13	1012	DUSP11	8446	SELM	140606	4.84557	0	0
AGR2	10551	KCNK3	3777	LPHN2	23266	10.1726	0	0			CDH13	1012	KIR2DL3	3804	KRT15	3866	4.75363	0	0
AGR2	10551	EFNB2	1948	BACE1	23621	10.1575	2.04541	0			CDH13	1012	ATP2C1	27032	SELM	140606	4.7012	1.77359	0
AGR2	10551	CRABP2	1382	FAM83E	54854	10.1343	2.95783	0			CDH13	1012	KRT15	3866	NCK1	4690	4.65421	0.306838	0
AGR2	10551	ATP1A2	477	PDE5A	8654	10.129	1.13151	0			CDH13	1012	KRT15	3866	SELM	140606	4.5145	0	0
AGR2	10551	ATAD2	29028	TBC1D20	128637	10.1229	0	0			CDO1	1036	JAM2	58494	CYYR1	116159	29.3348	1.37849	0
AGR2	10551	MAOB	4129	REEP5	7905	10.1161	0	0			CDO1	1036	CDC20	991	KIF2C	11004	24.0994	1.21916	0
AGR2	10551	AK3	50808	CYYR1	116159	10.0574	0.477739	0			CDO1	1036	ADH1B	125	TCF21	6943	22.3151	0.0866055	0
AGR2	10551	HYDIN	54768	ARMC4	55130	10.0407	17.1894	0			CDO1	1036	CDH5	1003	HIGD1B	51751	22.0111	0	0
AGR2	10551	LPHN2	23266	AZI2	64343	10.0348	0.665407	0			CDO1	1036	CCNB2	9133	CDCA5	113130	21.8282	5.63338	0
AGR2	10551	FAM107A	11170	JAM2	58494	10.0237	1.59957	0			CDO1	1036	TTC1	7265	LARP1	23367	21.3863	0.0623701	0
AGR2	10551	CA2	760	PAQR5	54852	10.0065	0	0			CDO1	1036	E2F2	1870	CDT1	81620	21.3161	0	0
AGR2	10551	CA2	760	CYYR1	116159	9.99956	0	0			CDO1	1036	NUMB	8650	UBE2S	27338	21.0436	1.009	0
AGR2	10551	SMOX	54498	LOC646197	646197	9.98762	0	0			CDO1	1036	AGER	177	DUOX1	53905	20.9825	0	0
AGR2	10551	TK1	7083	FZD4	8322	9.97866	1.58677	0			CDO1	1036	LDB2	9079	CYYR1	116159	20.4634	6.11243	0
AGR2	10551	EXOSC8	11340	AK3	50808	9.96801	2.87105	0			CDO1	1036	RAD54B	25788	PPP1R14A	94274	20.4535	3.78887	0
AGR2	10551	PTPRB	5787	SLC35A1	10559	9.9553	1.4696	0			CDO1	1036	TEK	7010	HIGD1B	51751	20.3196	0	0
AGR2	10551	C9orf116	138162	C15orf26	161502	9.95448	13.4567	0			CDO1	1036	FHL1	2273	ADAMTS8	11095	20.3108	1.38791	0
AGR2	10551	BCHE	590	LPHN2	23266	9.95429	0.813059	0			CDO1	1036	RGS5	8490	COX4I2	84701	20.3061	0	0
AGR2	10551	KCNK3	3777	CYYR1	116159	9.95333	0	0			CDO1	1036	KCNK3	3777	NOTCH4	4855	20.0792	2.24288	0
AGR2	10551	SOX9	6662	SH2D4A	63898	9.9351	0	0			CDO1	1036	UBE2C	11065	TPX2	22974	20.0785	2.71128	0
AGR2	10551	PPP2R2A	5520	ELP3	55140	9.92723	0	0			CDO1	1036	CDC25C	995	EXO1	9156	19.9593	0	0
AGR2	10551	CRABP2	1382	ETNK2	55224	9.92661	0	0			CDO1	1036	LDB2	9079	JAM2	58494	19.8792	1.72372	0
AGR2	10551	SPAG8	26206	PCDHAC1	56135	9.921	0	0			CDO1	1036	CDH5	1003	TEK	7010	19.6991	10.792	0
AGR2	10551	MAOB	4129	C14orf105	55195	9.91872	0	0			CDO1	1036	CDC25C	995	UBE2C	11065	19.6599	0	0
AGR2	10551	ADCY4	196883	CMYA5	202333	9.91443	0	0			CDO1	1036	KCNK3	3777	COX4I2	84701	19.6595	0	0
AGR2	10551	ACSL4	2182	CBX4	8535	9.91408	1.2378	0			CDO1	1036	HIGD1B	51751	RHOJ	57381	19.5881	0	0
AGR2	10551	CYYR1	116159	GSTA5	221357	9.91377	0	0			CDO1	1036	CA4	762	C9orf26	90865	19.551	0	0
AGR2	10551	ATP1A2	477	BCHE	590	9.89838	1.46262	0			CDO1	1036	EXO1	9156	CDCA5	113130	19.4824	1.55321	0
AGR2	10551	VIP	7432	SLC35A1	10559	9.89713	0.720981	0			CDO1	1036	TPX2	22974	CDCA5	113130	19.3983	3.42234	0
AGR2	10551	ENTPD2	954	AKR1B10	57016	9.89191	0.277284	0			CDO1	1036	FZD4	8322	RHOJ	57381	19.3304	0	0
AGR2	10551	CA2	760	JAM2	58494	9.89055	0.777571	0			CDO1	1036	SPTBN1	6711	SLC44A4	80736	19.2964	0.904141	0
AGR2	10551	JAM2	58494	LRRC18	474354	9.87982	0	0			CDO1	1036	SPARCL1	8404	RHOJ	57381	18.8779	1.40218	0
AGR2	10551	TBC1D20	128637	XKRX	402415	9.87868	0	0			CDO1	1036	SCN4B	6330	NTNG1	22854	18.7185	0	0
AGR2	10551	PTPRB	5787	PAQR5	54852	9.87854	0.433051	0			CDO1	1036	MYLK	4638	JAM3	83700	18.6113	0.736268	0
AGR2	10551	HYDIN	54768	C6orf201	404220	9.87152	1.28363	0			CDO1	1036	LDB2	9079	CLEC14A	161198	18.6088	4.82414	0
AGR2	10551	TEK	7010	FZD4	8322	9.86205	2.79	0			CDO1	1036	FHL5	9457	COX4I2	84701	18.5833	0	0
AGR2	10551	CA2	760	CA4	762	9.86098	4.12729	0			CDO1	1036	KIF20A	10112	CDCA5	113130	18.5801	4.83668	0
AGR2	10551	SNX17	9784	RBM25	58517	9.85853	1.87276	0			CDO1	1036	CDC25C	995	CDCA5	113130	18.4806	0	0
AGR2	10551	DLL4	54567	SETD3	84193	9.85651	0	0			CDO1	1036	CDC25C	995	TPX2	22974	18.395	0	0
AGR2	10551	PSAT1	29968	SETD3	84193	9.84307	0.735053	0			CDO1	1036	TMEM47	83604	SGIP1	84251	18.3565	0.843442	0
AGR2	10551	ZDHHC3	51304	ST6GALNAC1	55808	9.84147	0	0			CDO1	1036	VIP	7432	KIF12	113220	18.2564	0	0
AGR2	10551	ANXA2P3	305	AKR1B10	57016	9.83739	0.531276	0			CDO1	1036	ANGPT1	284	MAMDC2	256691	18.2265	6.11418	0
AGR2	10551	HLA-DRB4	3126	PRKAA1	5562	9.83096	0	0			CDO1	1036	FHL5	9457	LAMC3	10319	18.1593	3.79366	0
AGR2	10551	NR5A2	2494	PTPRN2	5799	9.82286	0	0			CDO1	1036	CCL14	6358	TCF21	6943	18.1155	0	0
AGR2	10551	ETNK2	55224	ADCY4	196883	9.81703	0.30894	0			CDO1	1036	TEK	7010	CYYR1	116159	18.0053	4.39876	0
AGR2	10551	DEFB124	245937	C6orf201	404220	9.80933	0	0			CDO1	1036	ADH1B	125	ABCA8	10351	17.9769	3.3145	0
AGR2	10551	SPAG8	26206	WDR63	126820	9.79164	7.28817	0			CDO1	1036	LDB2	9079	SNRK	54861	17.9604	3.9922	0
AGR2	10551	PCDHAC1	56135	AKR1B10	57016	9.79121	0	0			CDO1	1036	CDH5	1003	CALCRL	10203	17.9419	4.23011	0
AGR2	10551	PRRG2	5639	LGI4	163175	9.77258	0	0			CDO1	1036	SPARCL1	8404	LDB2	9079	17.8967	4.11046	0
AGR2	10551	FOXA3	3171	PAQR5	54852	9.76015	0	0			CDO1	1036	CALCRL	10203	COX4I2	84701	17.8359	0	0
AGR2	10551	SUSD4	55061	WDR63	126820	9.7377	0	0			CDO1	1036	FMO2	2327	ADAMTS8	11095	17.6767	0.755003	0
AGR2	10551	RPGR	6103	PLEKHF1	79156	9.73164	0.486897	0			CDO1	1036	ADH1B	125	CCL14	6358	17.6702	0	0
AGR2	10551	ST6GALNAC1	55808	HOOK3	84376	9.7268	0	0			CDO1	1036	FZD4	8322	RNASEH2A	10535	17.558	4.67256	0
AGR2	10551	WDR60	55112	HOOK3	84376	9.71934	0	0			CDO1	1036	HIGD1B	51751	CLEC14A	161198	17.414	0	0
AGR2	10551	KCNK3	3777	FZD4	8322	9.71118	0	0			CDO1	1036	PDGFRB	5159	C1QTNF5	114902	17.3919	0.373707	0
AGR2	10551	GTF3C2	2976	STARD7	56910	9.67204	1.10535	0			CDO1	1036	NOTCH4	4855	ROBO4	54538	17.2581	6.79714	0
AGR2	10551	BCHE	590	JAM2	58494	9.64704	0	0			CDO1	1036	CDO1	1036	CLDN18	51208	17.2563	3.88203	0
AGR2	10551	AK3	50808	XKRX	402415	9.64683	0	0			CDO1	1036	CCNB2	9133	EXO1	9156	17.2091	5.14832	0
AGR2	10551	ENTPD2	954	C14orf105	55195	9.6448	0	0			CDO1	1036	ROBO4	54538	HSPA12B	116835	17.1463	0	0
AGR2	10551	C14orf105	55195	WDR63	126820	9.62949	0.219298	0			CDO1	1036	FHL1	2273	RAMP3	10268	17.0706	0	0
AGR2	10551	FOXA3	3171	CORO2A	7464	9.61917	0	0			CDO1	1036	LAMC3	10319	HIGD1B	51751	17.0305	2.25213	0
AGR2	10551	SNX17	9784	STARD7	56910	9.61723	0	0			CDO1	1036	CDH5	1003	CLEC14A	161198	16.9572	3.49821	0
AGR2	10551	PTPRB	5787	CYYR1	116159	9.6172	3.31758	0			CDO1	1036	CDH5	1003	COX4I2	84701	16.8495	0	0
AGR2	10551	TMOD3	29766	IPO9	55705	9.61504	0.407667	0			CDO1	1036	TEK	7010	CALCRL	10203	16.8313	7.1561	0
AGR2	10551	BNIP3L	665	THSD1	55901	9.57719	0	0			CDO1	1036	CD34	947	RHOJ	57381	16.808	0.811492	0
AGR2	10551	MAOB	4129	FAM83E	54854	9.57169	2.81042	0			CDO1	1036	SGIP1	84251	C1QTNF7	114905	16.7815	2.53874	0
AGR2	10551	CKB	1152	HPN	3249	9.57154	0	0			CDO1	1036	SNRK	54861	JAM2	58494	16.7682	0	0
AGR2	10551	ECHS1	1892	AZI2	64343	9.55332	1.81692	0			CDO1	1036	SH2D3C	10044	CYYR1	116159	16.7562	0.0401061	0
AGR2	10551	MRPS31	10240	AK3	50808	9.54042	0	0			CDO1	1036	SH2D3C	10044	GIMAP8	155038	16.751	0.695597	0
AGR2	10551	PDE5A	8654	PCDH17	27253	9.5293	2.7711	0			CDO1	1036	CA4	762	GYPE	2996	16.7218	7.19379	0
AGR2	10551	PRKCSH	5589	SMARCA4	6597	9.52925	0	0			CDO1	1036	EPHA3	2042	C1QTNF7	114905	16.691	1.68274	0
AGR2	10551	TOMM70A	9868	SLC44A4	80736	9.50367	0	0			CDO1	1036	ECM2	1842	MAMDC2	256691	16.6772	6.3083	0
AGR2	10551	SLC35A1	10559	WDR78	79819	9.4995	0.323589	0			CDO1	1036	CDC25C	995	RECQL4	9401	16.6438	0	0
AGR2	10551	CA2	760	ERN2	10595	9.49928	2.47227	0			CDO1	1036	TEK	7010	CLEC14A	161198	16.6361	3.18873	0
AGR2	10551	HPN	3249	TBC1D24	57465	9.49156	0	0			CDO1	1036	PTTG1	9232	LMCD1	29995	16.6025	0	0
AGR2	10551	PTPRB	5787	LPHN2	23266	9.42149	2.86374	0			CDO1	1036	LPPR4	9890	LRRN3	54674	16.5809	0	0
AGR2	10551	FOXA3	3171	C14orf105	55195	9.40739	0	0			CDO1	1036	KLF2	10365	FAM107A	11170	16.5594	0.114727	0
AGR2	10551	CA2	760	LDB2	9079	9.4036	3.3293	0			CDO1	1036	NOTCH4	4855	BDH2	56898	16.541	0.0175521	0
AGR2	10551	PCDH17	27253	CYYR1	116159	9.39585	0	0			CDO1	1036	CALCRL	10203	CLEC14A	161198	16.5328	3.44169	0
AGR2	10551	EXTL3	2137	POLB	5423	9.38767	0	0			CDO1	1036	CDH5	1003	FZD4	8322	16.4951	3.60494	0
AGR2	10551	UGT8	7368	AKR1B10	57016	9.38662	0	0			CDO1	1036	RAMP2	10266	COX4I2	84701	16.4652	6.86931	0
AGR2	10551	C14orf105	55195	PCDHAC1	56135	9.37441	0	0			CDO1	1036	FHL5	9457	HIGD1B	51751	16.4597	0	0
AGR2	10551	BCHE	590	PCDH17	27253	9.37157	0	0			CDO1	1036	CDH5	1003	CYYR1	116159	16.4258	2.88609	0
AGR2	10551	CD36	948	STUB1	10273	9.36978	0	0			CDO1	1036	EXO1	9156	KIF20A	10112	16.4223	0	0
AGR2	10551	ETNK2	55224	CMYA5	202333	9.36061	0	0			CDO1	1036	CA2	760	TEK	7010	16.4017	4.47201	0
AGR2	10551	NLGN4X	57502	WDR78	79819	9.35274	0	0			CDO1	1036	AOC3	8639	ADAMTS8	11095	16.3719	10.0237	0
AGR2	10551	CASP10	843	JAM2	58494	9.34409	2.54008	0			CDO1	1036	CCL14	6358	VSIG2	23584	16.3715	0.430232	0
AGR2	10551	PRKCSH	5589	SNRPA	6626	9.33573	0.626589	0			CDO1	1036	CCNB2	9133	KIF20A	10112	16.3702	2.10915	0
AGR2	10551	BNIP3L	665	ACSL4	2182	9.31615	2.12365	0			CDO1	1036	TCF21	6943	C9orf26	90865	16.3589	2.89526	0
AGR2	10551	EIF4G1	1981	RAVER2	55225	9.30443	0	0			CDO1	1036	CD34	947	HRC	3270	16.3071	0.463705	0
AGR2	10551	MGC13040	85016	FBXO15	201456	9.29719	15.0145	0			CDO1	1036	LRRC32	2615	PDGFRB	5159	16.2968	0	0
AGR2	10551	HIST1H1B	3009	HSPB1	3315	9.29412	0	0			CDO1	1036	KIF2C	11004	CDCA8	55143	16.2917	0	0
AGR2	10551	ICAM2	3384	NME5	8382	9.28954	0	0			CDO1	1036	SELP	6403	ADAMTS8	11095	16.2914	0	0
AGR2	10551	CAPS	828	HYDIN	54768	9.28817	5.62762	0			CDO1	1036	NUMB	8650	EXOSC5	56915	16.2818	0.847142	0
AGR2	10551	CD36	948	C9orf26	90865	9.2876	0.780551	0			CDO1	1036	TEK	7010	LDB2	9079	16.2594	8.38348	0
AGR2	10551	FZD7	8324	BACE1	23621	9.28452	0	0			CDO1	1036	CD34	947	FHL5	9457	16.2584	0.98631	0
AGR2	10551	HYDIN	54768	FBXO15	201456	9.27444	12.4779	0			CDO1	1036	E2F2	1870	RNASEH2A	10535	16.248	0.488089	0
AGR2	10551	ATP1A2	477	VIP	7432	9.27079	0	0			CDO1	1036	CDADC1	81602	RAD52B	201299	16.1638	0	0
AGR2	10551	EFEMP1	2202	ST6GALNAC1	55808	9.27042	0	0			CDO1	1036	MYH11	4629	WFDC1	58189	16.1598	2.07942	0
AGR2	10551	NR5A2	2494	RPGR	6103	9.23278	0	0			CDO1	1036	KIF20A	10112	RNASEH2A	10535	16.1418	1.51455	0
AGR2	10551	CA8	767	HOOK3	84376	9.22371	0	0			CDO1	1036	EPHA3	2042	MAMDC2	256691	16.0516	1.37792	0
AGR2	10551	EDIL3	10085	EFCAB1	79645	9.20198	0	0			CDO1	1036	TIE1	7075	PKNOX2	63876	16.0371	4.56744	0
AGR2	10551	EFNB2	1948	SLC35A1	10559	9.19222	5.44512	0			CDO1	1036	TPX2	22974	CDCA8	55143	16.0217	1.13668	0
AGR2	10551	DOCK5	80005	BAIAP2L2	80115	9.19062	2.43297	0			CDO1	1036	BDH2	56898	COX4I2	84701	15.9856	0	0
AGR2	10551	SMAD6	4091	FZD4	8322	9.18284	1.15976	0			CDO1	1036	CCNF	899	TEK	7010	15.9829	0	0
AGR2	10551	STX1A	6804	UXS1	80146	9.18142	0	0			CDO1	1036	SNRK	54861	CLEC14A	161198	15.9656	0.688491	0
AGR2	10551	KCNE1	3753	CYYR1	116159	9.17151	0	0			CDO1	1036	TK1	7083	CCNB2	9133	15.9494	5.39072	0
AGR2	10551	DLX4	1748	HIST1H1B	3009	9.16979	0	0			CDO1	1036	HIGD1B	51751	CYYR1	116159	15.9456	0	0
AGR2	10551	KPNA1	3836	ZNF646	9726	9.16516	0	0			CDO1	1036	HMMR	3161	FZD4	8322	15.9215	0	0
AGR2	10551	RNF5	6048	BACE1	23621	9.1641	0.14418	0			CDO1	1036	EXO1	9156	UBE2C	11065	15.8929	1.92039	0
AGR2	10551	LRP5L	91355	R3HCC1	203069	9.16	0	0			CDO1	1036	HMMR	3161	TK1	7083	15.8581	0	0
AGR2	10551	SOX1	6656	EFHB	151651	9.15774	2.56602	0			CDO1	1036	CDC25C	995	KIF20A	10112	15.8227	0	0
AGR2	10551	NME5	8382	HYDIN	54768	9.14213	10.7145	0			CDO1	1036	SLC24A3	57419	PPP1R14A	94274	15.7772	0	0
AGR2	10551	REEP5	7905	SLITRK3	22865	9.13986	0.516519	0			CDO1	1036	KIF20A	10112	TPX2	22974	15.695	4.60216	0
AGR2	10551	TNNT1	7138	CUEDC2	79004	9.13869	2.91535	0			CDO1	1036	FOXF1	2294	CLEC14A	161198	15.6619	6.40032	0
AGR2	10551	MGC13040	85016	GLIS3	169792	9.12342	4.80551	0			CDO1	1036	RECQL4	9401	UBE2S	27338	15.5686	0	0
AGR2	10551	HOXC6	3223	MAN2B1	4125	9.12292	0.567569	0			CDO1	1036	KCNK3	3777	PCDH17	27253	15.5664	2.89149	0
AGR2	10551	POLB	5423	SMPDL3B	27293	9.1137	0	0			CDO1	1036	KCNE1	3753	NOTCH4	4855	15.5636	0.310661	0
AGR2	10551	ANXA2P3	305	S100A3	6274	9.10848	2.4313	0			CDO1	1036	ENG	2022	FCER1A	2205	15.485	0	0
AGR2	10551	LPHN2	23266	RNF141	50862	9.09562	0.836481	0			CDO1	1036	CAV1	857	HIGD1B	51751	15.4799	0	0
AGR2	10551	CA2	760	PTPRN2	5799	9.09489	0	0			CDO1	1036	UBE2C	11065	CDCA5	113130	15.4208	5.42588	0
AGR2	10551	C14orf105	55195	AKR1B10	57016	9.09244	0	0			CDO1	1036	SPARCL1	8404	CYYR1	116159	15.4193	5.21816	0
AGR2	10551	HPD	3242	UXS1	80146	9.08397	3.48073	0			CDO1	1036	SVEP1	79987	C1orf186	440712	15.4089	0	0
AGR2	10551	TOMM70A	9868	FAM83E	54854	9.08378	0	0			CDO1	1036	TIE1	7075	GPR146	115330	15.4066	4.54603	0
AGR2	10551	MMRN2	79812	GRHL2	79977	9.07952	1.28465	0			CDO1	1036	BCHE	590	FOXF1	2294	15.4016	0.650494	0
AGR2	10551	ANXA2P3	305	MUC5AC	4586	9.07703	0	0			CDO1	1036	NOTCH4	4855	RAMP2	10266	15.4002	0	0
AGR2	10551	EDIL3	10085	NLGN4X	57502	9.07067	0.59676	0			CDO1	1036	DACH1	1602	SSTR1	6751	15.3875	0	0
AGR2	10551	MUC5AC	4586	AKR1B10	57016	9.06235	8.17812	0			CDO1	1036	TK1	7083	CDCA5	113130	15.36	4.75739	0
AGR2	10551	HOXC6	3223	PRKCSH	5589	9.05596	0	0			CDO1	1036	DDX41	51428	LRRN3	54674	15.2789	0.764321	0
AGR2	10551	GTF3C2	2976	RANBP17	64901	9.04933	0	0			CDO1	1036	KCNK3	3777	TBX2	6909	15.2721	3.56445	0
AGR2	10551	ENTPD2	954	APOL1	8542	9.04503	0	0			CDO1	1036	BDH2	56898	CLEC14A	161198	15.2549	4.24822	0
AGR2	10551	HPGD	3248	BCAR3	8412	9.04211	0.804133	0			CDO1	1036	NOTCH4	4855	TBX2	6909	15.207	5.81466	0
AGR2	10551	UGT8	7368	C14orf105	55195	9.03879	0	0			CDO1	1036	ECM2	1842	MYLK	4638	15.2023	2.42557	0
AGR2	10551	THSD1	55901	PLEKHF1	79156	9.018	0	0			CDO1	1036	CALCRL	10203	BDH2	56898	15.1813	3.66234	0
AGR2	10551	KCNE1	3753	FZD4	8322	9.00756	0	0			CDO1	1036	TBX2	6909	PPP1R14A	94274	15.1436	0	0
AGR2	10551	SOX1	6656	LOC402221	402221	9.00438	0	0			CDO1	1036	TEK	7010	C9orf26	90865	15.1302	6.09447	0
AGR2	10551	TMOD3	29766	ETNK2	55224	8.99338	0.658878	0			CDO1	1036	CDH5	1003	RHOJ	57381	15.1281	2.94177	0
AGR2	10551	PTPRN2	5799	PAQR5	54852	8.98371	1.01154	0			CDO1	1036	KLC3	147700	XKRX	402415	15.1174	2.07177	0
AGR2	10551	DACH1	1602	PAQR5	54852	8.97953	2.20085	0			CDO1	1036	COX7A1	1346	MYLK	4638	15.108	0	0
AGR2	10551	MAN2B1	4125	WDR78	79819	8.95035	1.62511	0			CDO1	1036	CDO1	1036	SLC7A5	8140	15.0454	2.59089	0
AGR2	10551	WDR78	79819	TEX9	374618	8.93363	2.44351	0			CDO1	1036	CCNB2	9133	TPX2	22974	15.0445	1.66967	0
AGR2	10551	TEK	7010	ETNK2	55224	8.92798	0.294273	0			CDO1	1036	LDB2	9079	HIGD1B	51751	15.0408	0	0
AGR2	10551	HIPK3	10114	FBXO15	201456	8.92597	0	0			CDO1	1036	UBE2S	27338	EXOSC5	56915	15.0244	3.21582	0
AGR2	10551	DLX4	1748	LOC148709	148709	8.92563	0	0			CDO1	1036	FLNB	2317	OR7E37P	100506759	15.0081	0	0
AGR2	10551	FAM83E	54854	SLC44A4	80736	8.92128	0.218485	0			CDO1	1036	CDH5	1003	FHL5	9457	14.9975	2.5083	0
AGR2	10551	PAQR5	54852	C14orf105	55195	8.90895	0	0			CDO1	1036	KIF20A	10112	UBE2C	11065	14.9901	3.83024	0
AGR2	10551	PRKCSH	5589	CBX4	8535	8.90621	0	0			CDO1	1036	CD34	947	SH2D3C	10044	14.9669	0	0
AGR2	10551	UGT8	7368	FBXO15	201456	8.90354	0	0			CDO1	1036	HIGD1B	51751	C9orf26	90865	14.9349	0	0
AGR2	10551	PRKAA1	5562	CD300LG	146894	8.89728	0	0			CDO1	1036	COX7A1	1346	C1QTNF5	114902	14.9239	3.50876	0
AGR2	10551	JAM2	58494	C9orf26	90865	8.89335	3.3349	0			CDO1	1036	JAM3	83700	C1QTNF5	114902	14.9082	0	0
AGR2	10551	TK1	7083	WNT11	7481	8.88608	0	0			CDO1	1036	CDH6	1004	CYYR1	116159	14.9064	5.23219	0
AGR2	10551	TOMM70A	9868	FAM107A	11170	8.88442	1.15293	0			CDO1	1036	CD34	947	PDGFRB	5159	14.8794	3.99251	0
AGR2	10551	DFFA	1676	IPO9	55705	8.87294	0.739469	0			CDO1	1036	SNRK	54861	GIMAP8	155038	14.8779	5.70233	0
AGR2	10551	APOL1	8542	SLC35A1	10559	8.86178	0	0			CDO1	1036	ECM2	1842	C1QTNF7	114905	14.87	6.13422	0
AGR2	10551	MUC5AC	4586	NLGN4X	57502	8.85834	0	0			CDO1	1036	PCDH12	51294	KLRF1	51348	14.851	3.89271	0
AGR2	10551	SPTBN1	6711	PDE5A	8654	8.85538	0	0			CDO1	1036	CDC20	991	CCNB2	9133	14.8365	1.13261	0
AGR2	10551	CBX4	8535	YARS	8565	8.85362	0.0508063	0			CDO1	1036	HMMR	3161	TIE1	7075	14.8262	0	0
AGR2	10551	HOOK3	84376	SPTY2D1	144108	8.84158	3.7641	0			CDO1	1036	EXO1	9156	RNASEH2A	10535	14.8151	0.204787	0
AGR2	10551	GLIS3	169792	C6orf201	404220	8.84043	1.33466	0			CDO1	1036	MYLK	4638	HSPB7	27129	14.8114	0.308863	0
AGR2	10551	FOXA3	3171	C9orf116	138162	8.83205	0	0			CDO1	1036	FZD4	8322	HIGD1B	51751	14.8017	0	0
AGR2	10551	WDR60	55112	SPTY2D1	144108	8.82994	0	0			CDO1	1036	BCHE	590	LDB2	9079	14.7839	2.86999	0
AGR2	10551	ALB	213	PSMF1	9491	8.82121	0.829928	0			CDO1	1036	CDH5	1003	LAMC3	10319	14.7014	0.369683	0
AGR2	10551	MAN2B1	4125	DYNC2H1	79659	8.82003	2.26422	0			CDO1	1036	CCNA2	890	TK1	7083	14.6944	0	0
AGR2	10551	FCN3	8547	CYYR1	116159	8.79818	0	0			CDO1	1036	LDB2	9079	RHOJ	57381	14.6774	7.78778	0
AGR2	10551	CASP10	843	GSTA5	221357	8.79791	0	0			CDO1	1036	CDC20	991	E2F2	1870	14.6598	0.931359	0
AGR2	10551	EIF4G1	1981	RAPGEF6	51735	8.79768	7.84111	0			CDO1	1036	HRC	3270	RGS5	8490	14.6572	0	0
AGR2	10551	DACH1	1602	VIP	7432	8.78058	6.059	0			CDO1	1036	CA4	762	PTPRB	5787	14.6569	0	0
AGR2	10551	FZD4	8322	SLC35A1	10559	8.77186	2.14193	0			CDO1	1036	HIGD1B	51751	JAM2	58494	14.6223	1.00672	0
AGR2	10551	EFEMP1	2202	SLC35A1	10559	8.74827	0.107055	0			CDO1	1036	ADH1B	125	ANGPT1	284	14.6193	6.04462	0
AGR2	10551	RNF141	50862	AZI2	64343	8.73277	0	0			CDO1	1036	MYH11	4629	HSPB7	27129	14.6123	1.95404	0
AGR2	10551	WDR78	79819	EFHB	151651	8.73123	7.8404	0			CDO1	1036	FOXF1	2294	GIMAP8	155038	14.5862	0.435985	0
AGR2	10551	PRRG1	5638	CORO2A	7464	8.72439	1.37032	0			CDO1	1036	BIRC5	332	CDCA5	113130	14.5707	3.18168	0
AGR2	10551	CA2	760	CD36	948	8.70961	1.87897	0			CDO1	1036	EXO1	9156	TPX2	22974	14.5697	0	0
AGR2	10551	PSAT1	29968	GLIS3	169792	8.70927	0	0			CDO1	1036	EPHA3	2042	LTBP4	8425	14.5638	1.07515	0
AGR2	10551	SNAP23	8773	LPHN2	23266	8.69896	0	0			CDO1	1036	CDH5	1003	NOTCH4	4855	14.5589	0	0
AGR2	10551	DACH1	1602	DFFA	1676	8.69785	0	0			CDO1	1036	FHL5	9457	CLEC14A	161198	14.5509	0	0
AGR2	10551	CD36	948	RNPS1	10921	8.68405	0	0			CDO1	1036	RAMP3	10268	PLAC9	219348	14.5447	1.98262	0
AGR2	10551	TK1	7083	LRRC18	474354	8.67984	0	0			CDO1	1036	FHL1	2273	AOC3	8639	14.5377	2.80603	0
AGR2	10551	MAOB	4129	PSAT1	29968	8.6719	0.406451	0			CDO1	1036	SPARCL1	8404	CLEC14A	161198	14.5256	1.76516	0
AGR2	10551	ACSL4	2182	WDR78	79819	8.67062	0	0			CDO1	1036	KCNE1	3753	ROBO4	54538	14.5177	0.853693	0
AGR2	10551	S100A3	6274	BACE1	23621	8.65534	1.02041	0			CDO1	1036	DUOX1	53905	TBC1D2	55357	14.5107	0.48447	0
AGR2	10551	BCAR3	8412	YARS	8565	8.65072	0	0			CDO1	1036	MAP2K2	5605	KRTCAP3	200634	14.5106	0	0
AGR2	10551	MAOB	4129	JAM2	58494	8.64498	0	0			CDO1	1036	CAV1	857	LDB2	9079	14.5092	2.20293	0
AGR2	10551	PAQR5	54852	C9orf26	90865	8.64259	0	0			CDO1	1036	RNASEH2A	10535	CDCA5	113130	14.5086	1.41359	0
AGR2	10551	ACSL4	2182	RPGR	6103	8.63596	0	0			CDO1	1036	PLSCR4	57088	KRTCAP3	200634	14.4491	0	0
AGR2	10551	KCNE1	3753	GSTA5	221357	8.63414	9.78708	0			CDO1	1036	FHL5	9457	RHOJ	57381	14.4487	0.71734	0
AGR2	10551	PTPRB	5787	FZD4	8322	8.63329	6.93333	0			CDO1	1036	CLEC3B	7123	HIGD1B	51751	14.4378	6.30713	0
AGR2	10551	NR5A2	2494	HMGCS2	3158	8.63176	0	0			CDO1	1036	CD55	1604	UBE2Z	65264	14.4376	0	0
AGR2	10551	P2RY4	5030	SOX1	6656	8.63138	0	0			CDO1	1036	RHOF	54509	VSIG1	340547	14.4304	0	0
AGR2	10551	FOXA3	3171	AKR1B10	57016	8.62802	0.102675	0			CDO1	1036	RHOJ	57381	CYYR1	116159	14.3977	1.64434	0
AGR2	10551	EIF4G1	1981	HIST1H1B	3009	8.62191	0	0			CDO1	1036	RHOJ	57381	COX4I2	84701	14.3865	0	0
AGR2	10551	SOX9	6662	AKR1B10	57016	8.61975	0	0			CDO1	1036	TBX2	6909	SLC24A3	57419	14.3782	0	0
AGR2	10551	DACH1	1602	SNRK	54861	8.60707	0.446222	0			CDO1	1036	CD34	947	SPARCL1	8404	14.3562	3.24087	0
AGR2	10551	SNRPA	6626	GRHL2	79977	8.60039	0	0			CDO1	1036	CCNA2	890	CDCA8	55143	14.3486	0	0
AGR2	10551	UGT8	7368	C9orf116	138162	8.58945	0	0			CDO1	1036	EPS15	2060	C14orf132	56967	14.3171	1.52854	0
AGR2	10551	EIF4G1	1981	LOC148709	148709	8.5844	0	0			CDO1	1036	TIE1	7075	FZD4	8322	14.2903	0.250854	0
AGR2	10551	GMDS	2762	ARID1B	57492	8.57903	0.754284	0			CDO1	1036	FOXF1	2294	KCNK3	3777	14.2847	0	0
AGR2	10551	FBXO15	201456	R3HCC1	203069	8.57833	0.122354	0			CDO1	1036	PLA2G1B	5319	DUOX1	53905	14.2721	0	0
AGR2	10551	HSPB1	3315	ATAD2	29028	8.56418	0	0			CDO1	1036	COX7A1	1346	PDGFRB	5159	14.2686	0	0
AGR2	10551	ZDHHC3	51304	C14orf105	55195	8.55574	0	0			CDO1	1036	BIRC5	332	UBE2C	11065	14.2676	9.46959	0
AGR2	10551	OSBPL2	9885	GPRC5C	55890	8.54585	0	0			CDO1	1036	BIRC5	332	TPX2	22974	14.2656	2.64351	0
AGR2	10551	CD300LG	146894	GSTA5	221357	8.54189	0	0			CDO1	1036	GIMAP8	155038	CLEC14A	161198	14.2411	0.048141	0
AGR2	10551	EFHB	151651	TEX9	374618	8.54064	7.77152	0			CDO1	1036	TCF21	6943	PKNOX2	63876	14.2319	1.79297	0
AGR2	10551	EXTL3	2137	R3HCC1	203069	8.53927	0	0			CDO1	1036	FCER1A	2205	LPPR4	9890	14.1942	2.03054	0
AGR2	10551	MAN2B1	4125	ARID5A	10865	8.51357	0.390005	0			CDO1	1036	MYH11	4629	LMCD1	29995	14.1496	0	0
AGR2	10551	BDKRB2	624	MAOB	4129	8.5072	0	0			CDO1	1036	CD34	947	NOTCH4	4855	14.1364	0	0
AGR2	10551	NME5	8382	C14orf105	55195	8.50587	1.59069	0			CDO1	1036	SH2D3C	10044	RAMP3	10268	14.114	2.72939	0
AGR2	10551	DACH1	1602	LDB2	9079	8.48913	0	0			CDO1	1036	ANGPT1	284	RHOJ	57381	14.112	1.54291	0
AGR2	10551	LRP5L	91355	TBC1D20	128637	8.48763	1.74752	0			CDO1	1036	ADH1B	125	SELP	6403	14.1115	0	0
AGR2	10551	STAC	6769	IGSF22	283284	8.47514	0	0			CDO1	1036	BIRC5	332	CDT1	81620	14.11	0	0
AGR2	10551	ENTPD2	954	KIF12	113220	8.47213	0	0			CDO1	1036	SPARCL1	8404	HIGD1B	51751	14.1005	0.981917	0
AGR2	10551	STUB1	10273	LAPTM4B	55353	8.45608	0	0			CDO1	1036	LRRC32	2615	KCNE1	3753	14.0967	0	0
AGR2	10551	AKR1B10	57016	WDR63	126820	8.44791	0	0			CDO1	1036	ATP1A2	477	RAMP2	10266	14.0888	0.641272	0
AGR2	10551	FAM83E	54854	ETNK2	55224	8.44473	0	0			CDO1	1036	RNASEH2A	10535	CDT1	81620	14.0823	2.16539	0
AGR2	10551	BCAR3	8412	VPS37B	79720	8.44364	2.73668	0			CDO1	1036	BCHE	590	NTNG1	22854	14.0813	0	0
AGR2	10551	TBC1D24	57465	UXS1	80146	8.44292	0	0			CDO1	1036	BIRC5	332	CDC25C	995	14.071	0.512426	0
AGR2	10551	TK1	7083	REEP5	7905	8.43489	3.07018	0			CDO1	1036	GRK5	2869	ABI3BP	25890	14.0695	3.23388	0
AGR2	10551	FAM107A	11170	PCDH17	27253	8.43176	0	0			CDO1	1036	SPARCL1	8404	JAM2	58494	14.0232	0	0
AGR2	10551	BCAR3	8412	NLGN4X	57502	8.42917	0.260115	0			CDO1	1036	CCNB2	9133	CDCA8	55143	14.0036	2.22078	0
AGR2	10551	UGT2B10	7365	UGT8	7368	8.42713	0	0			CDO1	1036	TEK	7010	JAM2	58494	13.9813	3.01009	0
AGR2	10551	APOL1	8542	LRRC46	90506	8.41196	0	0			CDO1	1036	PDE5A	8654	SGIP1	84251	13.9766	4.61084	0
AGR2	10551	EFNB2	1948	S100A3	6274	8.41194	0	0			CDO1	1036	SNRK	54861	CYYR1	116159	13.9486	8.44543	0
AGR2	10551	DLX4	1748	RNPS1	10921	8.41	0	0			CDO1	1036	WFDC1	58189	LOC407835	407835	13.9296	0	0
AGR2	10551	UPB1	51733	CMYA5	202333	8.40883	0.494327	0			CDO1	1036	KCNK3	3777	BDH2	56898	13.9141	0.144976	0
AGR2	10551	SMOX	54498	BAIAP2L2	80115	8.40729	0	0			CDO1	1036	CDC25C	995	CDCA8	55143	13.9062	0	0
AGR2	10551	DBH	1621	MAN2B1	4125	8.40646	0	0			CDO1	1036	LPPR4	9890	KCNT2	343450	13.9044	0	0
AGR2	10551	PDE5A	8654	JAM2	58494	8.40554	0	0			CDO1	1036	RAMP3	10268	PCDH17	27253	13.8914	0	0
AGR2	10551	HPN	3249	S100A3	6274	8.40083	1.56091	0			CDO1	1036	SELP	6403	CYYR1	116159	13.8839	0	0
AGR2	10551	DFFA	1676	AK3	50808	8.39976	0.20967	0			CDO1	1036	HIGD1B	51751	SOX17	64321	13.8738	0	0
AGR2	10551	CORO2A	7464	PCDHAC1	56135	8.39504	0.975821	0			CDO1	1036	GYPE	2996	C9orf26	90865	13.8571	0	0
AGR2	10551	EFEMP1	2202	FZD4	8322	8.38821	0	0			CDO1	1036	EXO1	9156	INMT	11185	13.825	0	0
AGR2	10551	UGT2B10	7365	C9orf116	138162	8.38319	0.196375	0			CDO1	1036	E2F2	1870	CCNB2	9133	13.8205	6.26636	0
AGR2	10551	SPTBN1	6711	FAM83E	54854	8.37996	0	0			CDO1	1036	CDCA8	55143	CDCA5	113130	13.8085	2.17292	0
AGR2	10551	RNF5	6048	EFHB	151651	8.37329	0.63259	0			CDO1	1036	DACH1	1602	CYYR1	116159	13.7849	0	0
AGR2	10551	MAOB	4129	CYYR1	116159	8.37301	0	0			CDO1	1036	CYYR1	116159	GIMAP8	155038	13.7634	8.98702	0
AGR2	10551	HOXC6	3223	SMARCA4	6597	8.36175	0	0			CDO1	1036	RHOJ	57381	CLEC14A	161198	13.7592	6.09395	0
AGR2	10551	FCN3	8547	LDB2	9079	8.36036	0	0			CDO1	1036	SOX17	64321	CYYR1	116159	13.7559	0.395109	0
AGR2	10551	AK3	50808	SNRK	54861	8.3592	1.9488	0			CDO1	1036	FCER1A	2205	LRRN3	54674	13.7508	0.748077	0
AGR2	10551	BNIP3L	665	CCL25	6370	8.3499	0	0			CDO1	1036	CDC25C	995	RNASEH2A	10535	13.7492	0	0
AGR2	10551	DACH1	1602	KCNK3	3777	8.34889	1.67788	0			CDO1	1036	CDC20	991	TPX2	22974	13.7259	0	0
AGR2	10551	FZD4	8322	JAM2	58494	8.33701	0	0			CDO1	1036	SH2D3C	10044	JAM2	58494	13.7242	3.77107	0
AGR2	10551	EIF4G1	1981	SNAP23	8773	8.33521	3.35929	0			CDO1	1036	EPHA3	2042	SGIP1	84251	13.7201	0	0
AGR2	10551	FZD4	8322	OSBPL2	9885	8.33044	0.505519	0			CDO1	1036	PTPRB	5787	C9orf26	90865	13.7119	0.390046	0
AGR2	10551	IER3	8870	MAN1B1	11253	8.29741	0	0			CDO1	1036	NUMB	8650	ZFYVE21	79038	13.71	1.66358	0
AGR2	10551	MGC13040	85016	C9orf116	138162	8.28136	22.2074	0			CDO1	1036	PIK3R1	5295	ARHGEF15	22899	13.707	0	0
AGR2	10551	MRPS31	10240	KLC2	64837	8.27998	0	0			CDO1	1036	LDB2	9079	C9orf26	90865	13.7054	7.59588	0
AGR2	10551	EXTL3	2137	STX1A	6804	8.26722	1.28763	0			CDO1	1036	BIRC5	332	KIF2C	11004	13.6915	0	0
AGR2	10551	PCDH17	27253	LRRC18	474354	8.25726	0	0			CDO1	1036	LRRN3	54674	COX4I2	84701	13.6825	0	0
AGR2	10551	BMPR1A	657	C6orf201	404220	8.25578	0	0			CDO1	1036	FHL5	9457	CALCRL	10203	13.6727	0.109617	0
AGR2	10551	FZD7	8324	LPGAT1	9926	8.2493	2.76104	0			CDO1	1036	CDO1	1036	HIGD1B	51751	13.6634	0	0
AGR2	10551	AZI2	64343	WDR78	79819	8.22747	0	0			CDO1	1036	NTNG1	22854	C9orf26	90865	13.6564	0	0
AGR2	10551	CA2	760	PTPRB	5787	8.21933	0.756161	0			CDO1	1036	ADH1B	125	MAMDC2	256691	13.6563	4.76703	0
AGR2	10551	HOXC6	3223	THSD1	55901	8.21495	4.64186	0			CDO1	1036	BCHE	590	SNRK	54861	13.6381	0.963162	0
AGR2	10551	BCHE	590	CYYR1	116159	8.20129	0.651984	0			CDO1	1036	AGER	177	CLDN18	51208	13.5909	1.2198	0
AGR2	10551	EXTL3	2137	UXS1	80146	8.19436	2.71595	0			CDO1	1036	SH2D3C	10044	RHOJ	57381	13.5871	2.32784	0
AGR2	10551	SOX9	6662	CBX4	8535	8.19415	0	0			CDO1	1036	ATP1A2	477	CDO1	1036	13.5771	0	0
AGR2	10551	ECHS1	1892	PRKAA1	5562	8.19243	0.0441547	0			CDO1	1036	KIF2C	11004	CDT1	81620	13.5581	0	0
AGR2	10551	CDV3	55573	LOC402221	402221	8.19148	0	0			CDO1	1036	CD34	947	RGS5	8490	13.5513	2.20968	0
AGR2	10551	PRRG1	5638	C14orf105	55195	8.17399	0	0			CDO1	1036	ANGPT1	284	SPARCL1	8404	13.5457	5.73232	0
AGR2	10551	ELP3	55140	FBXO15	201456	8.16654	0	0			CDO1	1036	CDC20	991	CDCA8	55143	13.5355	0	0
AGR2	10551	HSPB1	3315	HOOK3	84376	8.16588	0	0			CDO1	1036	CALCRL	10203	HIGD1B	51751	13.5208	0	0
AGR2	10551	KPNA1	3836	UPB1	51733	8.16172	0	0			CDO1	1036	CYYR1	116159	CLEC14A	161198	13.5192	1.12964	0
AGR2	10551	SMOX	54498	IPO9	55705	8.16115	0	0			CDO1	1036	TEK	7010	RHOJ	57381	13.5035	2.87564	0
AGR2	10551	HPGD	3248	RNF141	50862	8.15438	3.96481	0			CDO1	1036	CDC20	991	TIE1	7075	13.5018	0	0
AGR2	10551	FZD4	8322	LDB2	9079	8.14867	2.15719	0			CDO1	1036	PDGFRB	5159	RGS5	8490	13.4986	3.74753	0
AGR2	10551	YARS	8565	PAQR5	54852	8.14578	0	0			CDO1	1036	TEK	7010	ABCA8	10351	13.4974	1.71436	0
AGR2	10551	VPS37B	79720	CMYA5	202333	8.1364	1.64089	0			CDO1	1036	ANGPT1	284	SELP	6403	13.4959	0	0
AGR2	10551	HLA-DRB4	3126	TLE3	7090	8.12635	0.338208	0			CDO1	1036	ARHGEF15	22899	CLDN18	51208	13.4827	0.209	0
AGR2	10551	HOXC6	3223	WDR78	79819	8.10709	2.28708	0			CDO1	1036	SH2D3C	10044	PCDH17	27253	13.4696	0	0
AGR2	10551	CAPS	828	C9orf116	138162	8.09909	25.3624	0			CDO1	1036	LRRC32	2615	HSPA12B	116835	13.4689	1.57442	0
AGR2	10551	ANXA2P3	305	PANX2	56666	8.08547	0	0			CDO1	1036	EIF4A2	1974	EPS15	2060	13.4603	4.74808	0
AGR2	10551	PRKAA1	5562	DYNC2H1	79659	8.07923	0	0			CDO1	1036	RAD54B	25788	SLC24A3	57419	13.4584	0	0
AGR2	10551	UGT8	7368	CORO2A	7464	8.06297	0	0			CDO1	1036	CD34	947	HIGD1B	51751	13.4497	0	0
AGR2	10551	JAM2	58494	CD300LG	146894	8.0613	0	0			CDO1	1036	CAV1	857	CLEC14A	161198	13.4081	3.70509	0
AGR2	10551	UPB1	51733	PYCRL	65263	8.05786	0	0			CDO1	1036	KCNK3	3777	RAMP2	10266	13.4021	0	0
AGR2	10551	AZI2	64343	DYNC2H1	79659	8.05354	1.04455	0			CDO1	1036	CCNA2	890	CDCA5	113130	13.3975	0.714871	0
AGR2	10551	ARMC4	55130	LRRC46	90506	8.03233	9.24694	0			CDO1	1036	LARP1	23367	TMEM47	83604	13.3924	0	0
AGR2	10551	ANXA2P3	305	SMARCA4	6597	8.01894	1.44643	0			CDO1	1036	CLEC3B	7123	NTNG1	22854	13.3644	0	0
AGR2	10551	EXTL3	2137	STAC	6769	8.01302	0	0			CDO1	1036	DACH1	1602	GRK5	2869	13.3589	0	0
AGR2	10551	KCNK3	3777	LDB2	9079	8.00236	0	0			CDO1	1036	SH2D3C	10044	SNRK	54861	13.3546	0	0
AGR2	10551	NME5	8382	LRRC46	90506	7.99592	8.69294	0			CDO1	1036	CDC25C	995	CCNB2	9133	13.3537	0	0
AGR2	10551	PRKAA1	5562	VIP	7432	7.98142	0	0			CDO1	1036	ROBO4	54538	BDH2	56898	13.3413	1.50924	0
AGR2	10551	HIST1H1B	3009	TNNT1	7138	7.97187	0	0			CDO1	1036	COX4I2	84701	CYYR1	116159	13.3318	0	0
AGR2	10551	BNIP3L	665	HLA-DRB4	3126	7.97016	0	0			CDO1	1036	CDH5	1003	KCNE1	3753	13.3248	0.552004	0
AGR2	10551	BNIP3L	665	AZI2	64343	7.96676	4.7107	0			CDO1	1036	CDO1	1036	ARHGEF15	22899	13.3238	0	0
AGR2	10551	EXTL3	2137	ELP3	55140	7.96489	0	0			CDO1	1036	SELP	6403	RAMP3	10268	13.3047	2.36373	0
AGR2	10551	DFFA	1676	MAOB	4129	7.96453	0	0			CDO1	1036	CD34	947	CLEC14A	161198	13.291	1.16038	0
AGR2	10551	SPTBN1	6711	PANX2	56666	7.96088	0.925404	0			CDO1	1036	CA2	760	BCAS4	55653	13.2831	1.34286	0
AGR2	10551	PCDHAC1	56135	FBXO15	201456	7.95667	0	0			CDO1	1036	JAM3	83700	SGIP1	84251	13.2819	11.1961	0
AGR2	10551	LDB2	9079	MMRN2	79812	7.94253	2.70668	0			CDO1	1036	ECM2	1842	JAM3	83700	13.2641	0.77357	0
AGR2	10551	TOMM70A	9868	ADCY4	196883	7.92283	0	0			CDO1	1036	FHL1	2273	CCL14	6358	13.2555	0	0
AGR2	10551	TNNT1	7138	ATAD2	29028	7.9189	0	0			CDO1	1036	A2M	2	MAMDC2	256691	13.2484	0.257081	0
AGR2	10551	PDE5A	8654	SUSD4	55061	7.91478	0	0			CDO1	1036	TCF21	6943	ABCA8	10351	13.247	0	0
AGR2	10551	HIPK3	10114	PLEKHF1	79156	7.90772	0.113046	0			CDO1	1036	FOXD2	2306	CCDC68	80323	13.2432	0	0
AGR2	10551	GTF3C2	2976	LAPTM4B	55353	7.90726	0.192778	0			CDO1	1036	TBX2	6909	SGIP1	84251	13.2259	1.51068	0
AGR2	10551	MAOB	4129	SLITRK3	22865	7.90421	0	0			CDO1	1036	CDH5	1003	SOX17	64321	13.219	0.141324	0
AGR2	10551	SPTBN1	6711	SPAG8	26206	7.89512	0	0			CDO1	1036	CDH5	1003	LDB2	9079	13.2125	5.63951	0
AGR2	10551	CD36	948	NR5A2	2494	7.88515	0	0			CDO1	1036	RAMP3	10268	DONSON	29980	13.2116	0	0
AGR2	10551	HSP90AB1	3326	EFHB	151651	7.88443	0	0			CDO1	1036	TIE1	7075	RAD52B	201299	13.2105	0	0
AGR2	10551	BACE1	23621	NLGN4X	57502	7.87872	0	0			CDO1	1036	ABI3BP	25890	CLDN18	51208	13.1992	0	0
AGR2	10551	FGFR2	2263	SRM	6723	7.87708	0	0			CDO1	1036	SPARCL1	8404	SH2D3C	10044	13.1935	0	0
AGR2	10551	ELP3	55140	TBC1D20	128637	7.87586	0.229921	0			CDO1	1036	PTPRB	5787	LDB2	9079	13.1925	2.01378	0
AGR2	10551	LAPTM4B	55353	STARD7	56910	7.87476	0	0			CDO1	1036	RGS5	8490	BDH2	56898	13.1898	2.97662	0
AGR2	10551	PPP2R2A	5520	RAVER2	55225	7.8529	0.712501	0			CDO1	1036	IGFBP7	3490	PLSCR4	57088	13.1768	4.42329	0
AGR2	10551	CORO2A	7464	WDR78	79819	7.85132	1.66461	0			CDO1	1036	CA2	760	CCNF	899	13.1765	0	0
AGR2	10551	KLHL4	56062	CLMN	79789	7.83999	0.519506	0			CDO1	1036	LDB2	9079	GIMAP8	155038	13.176	3.33433	0
AGR2	10551	PPP2R2A	5520	PSMF1	9491	7.83886	0	0			CDO1	1036	CDH5	1003	SH2D3C	10044	13.171	4.48078	0
AGR2	10551	TNNT1	7138	OR5B12	390191	7.83615	0	0			CDO1	1036	SELP	6403	LDB2	9079	13.1675	0	0
AGR2	10551	KCNE1	3753	JAM2	58494	7.83233	0.00771846	0			CDO1	1036	F10	2159	GPR146	115330	13.1498	1.97888	0
AGR2	10551	SHANK2	22941	ST6GALNAC1	55808	7.82793	0	0			CDO1	1036	HIGD1B	51751	COX4I2	84701	13.1471	8.83648	0
AGR2	10551	ASAH1	427	PLEKHF1	79156	7.81344	0	0			CDO1	1036	SND1	27044	RFWD3	55159	13.1467	0	0
AGR2	10551	SLC35A1	10559	PLEKHF1	79156	7.81235	0	0			CDO1	1036	FHL1	2273	FAM107A	11170	13.1401	0.820534	0
AGR2	10551	EFEMP1	2202	AZI2	64343	7.81214	1.95267	0			CDO1	1036	CD34	947	CYYR1	116159	13.1289	3.77516	0
AGR2	10551	GLS2	27165	UXS1	80146	7.81115	2.32722	0			CDO1	1036	CDH6	1004	BDH2	56898	13.1286	0	0
AGR2	10551	PRKAA1	5562	AZI2	64343	7.80893	3.6139	0			CDO1	1036	LRRC32	2615	C1QTNF5	114902	13.1233	0.0784442	0
AGR2	10551	SLC35A1	10559	RNF141	50862	7.80716	2.56702	0			CDO1	1036	ECM2	1842	GSTM5	2949	13.1019	0.223071	0
AGR2	10551	DACH1	1602	PCDH17	27253	7.80005	2.82206	0			CDO1	1036	BCHE	590	LRRN3	54674	13.1011	0.413176	0
AGR2	10551	ARMC4	55130	LGI4	163175	7.79968	0	0			CDO1	1036	RAMP3	10268	KLF2	10365	13.1001	0	0
AGR2	10551	MAN2B1	4125	EDIL3	10085	7.7729	0.449347	0			CDO1	1036	BCHE	590	KCNK3	3777	13.0946	0	0
AGR2	10551	BCAR3	8412	EDIL3	10085	7.77074	0.924557	0			CDO1	1036	PDE5A	8654	TMEM47	83604	13.0757	2.04784	0
AGR2	10551	SMAD6	4091	TBX3	6926	7.75758	1.24364	0			CDO1	1036	RAMP3	10268	INMT	11185	13.05	0	0
AGR2	10551	PPP2R2A	5520	SMPDL3B	27293	7.7571	2.1795	0			CDO1	1036	SPARCL1	8404	FHL5	9457	13.0295	0.908209	0
AGR2	10551	MAN2B1	4125	SLC35A1	10559	7.75465	0	0			CDO1	1036	MYH11	4629	PDGFRB	5159	13.0149	2.42652	0
AGR2	10551	FZD4	8322	SNRK	54861	7.75174	3.85783	0			CDO1	1036	LDB2	9079	CHL1	10752	12.9871	0	0
AGR2	10551	TNNT1	7138	TBC1D20	128637	7.74649	0	0			CDO1	1036	CD34	947	JAM2	58494	12.9822	0	0
AGR2	10551	TBX3	6926	TBC1D20	128637	7.74648	3.13971	0			CDO1	1036	RAMP3	10268	ADAMTS8	11095	12.9754	0	0
AGR2	10551	TBX3	6926	PSMF1	9491	7.7395	0.763777	0			CDO1	1036	LDB2	9079	CALCRL	10203	12.9734	4.82884	0
AGR2	10551	CRABP2	1382	XKRX	402415	7.72986	1.38082	0			CDO1	1036	MKS1	54903	BCAS4	55653	12.9689	2.77382	0
AGR2	10551	ID1	3397	KPNA1	3836	7.7277	2.09784	0			CDO1	1036	CDADC1	81602	PEAR1	375033	12.9538	0	0
AGR2	10551	CORO2A	7464	WDR63	126820	7.72402	3.68942	0			CDO1	1036	TBX2	6909	PDE5A	8654	12.9398	2.67886	0
AGR2	10551	TNNT1	7138	XKRX	402415	7.72184	4.24368	0			CDO1	1036	ADH1B	125	PKNOX2	63876	12.9266	0	0
AGR2	10551	ACSL4	2182	RAPGEF6	51735	7.70706	1.34916	0			CDO1	1036	MRPL12	6182	ABCA8	10351	12.9235	0.304765	0
AGR2	10551	SLC44A4	80736	WDR63	126820	7.70275	10.4564	0			CDO1	1036	EPS15	2060	RERG	85004	12.9228	3.59524	0
AGR2	10551	CCBL2	56267	GLIS3	169792	7.70255	0	0			CDO1	1036	WFDC1	58189	TMEM47	83604	12.9181	0	0
AGR2	10551	SUSD4	55061	MGC11266	79172	7.69853	0	0			CDO1	1036	CA2	760	GYPE	2996	12.9034	0.551642	0
AGR2	10551	TMOD3	29766	AK3	50808	7.69147	0	0			CDO1	1036	ANXA3	306	SLC35A1	10559	12.8972	0	0
AGR2	10551	MAOB	4129	VPS37B	79720	7.68882	2.71677	0			CDO1	1036	CCNA2	890	CDT1	81620	12.8938	0	0
AGR2	10551	TRAFD1	10906	TEX9	374618	7.67407	0	0			CDO1	1036	TIE1	7075	KIF2C	11004	12.8917	0	0
AGR2	10551	ENTPD2	954	FOXA3	3171	7.67155	0.172234	0			CDO1	1036	RNASEH2A	10535	RHOJ	57381	12.8893	0.343234	0
AGR2	10551	KPNA1	3836	XKRX	402415	7.66736	0	0			CDO1	1036	COX7A1	1346	DKK3	27122	12.8876	0	0
AGR2	10551	LDB2	9079	PCDH17	27253	7.65546	0	0			CDO1	1036	CCNB2	9133	RNASEH2A	10535	12.8829	3.33857	0
AGR2	10551	FCN3	8547	JAM2	58494	7.6547	1.53749	0			CDO1	1036	CDO1	1036	JAM2	58494	12.8792	0.988059	0
AGR2	10551	SH2D4A	63898	SLC44A4	80736	7.64977	0	0			CDO1	1036	RAMP2	10266	ROBO4	54538	12.8751	0.91436	0
AGR2	10551	VIP	7432	PCDH17	27253	7.64128	0.219376	0			CDO1	1036	PTTG1	9232	CDT1	81620	12.8711	0.0576181	0
AGR2	10551	KCNK3	3777	CMYA5	202333	7.64029	0	0			CDO1	1036	DSTN	11034	RFWD3	55159	12.861	0.733528	0
AGR2	10551	KCNE1	3753	SETD3	84193	7.63701	0	0			CDO1	1036	CD34	947	BDH2	56898	12.8474	0.191984	0
AGR2	10551	VPS37B	79720	GSTA5	221357	7.63442	0	0			CDO1	1036	LMCD1	29995	C1QTNF5	114902	12.8389	1.31035	0
AGR2	10551	GLIS3	169792	DEFB124	245937	7.63184	0	0			CDO1	1036	LMCD1	29995	CDT1	81620	12.8386	0	0
AGR2	10551	REEP5	7905	SETD3	84193	7.62996	2.51383	0			CDO1	1036	CCNA2	890	CCNB2	9133	12.8328	0.867353	0
AGR2	10551	ENTPD2	954	BACE2	25825	7.62886	0	0			CDO1	1036	HMMR	3161	RNASEH2A	10535	12.8193	0	0
AGR2	10551	PSMF1	9491	FBXO15	201456	7.62857	0	0			CDO1	1036	SPARCL1	8404	LRRN3	54674	12.7921	2.28755	0
AGR2	10551	FAM83E	54854	JAM2	58494	7.62282	0	0			CDO1	1036	GRK5	2869	CLEC14A	161198	12.7864	7.6757	0
AGR2	10551	BCAR3	8412	SLC35A1	10559	7.62278	2.86358	0			CDO1	1036	RFWD3	55159	MRPS5	64969	12.7851	0	0
AGR2	10551	HOXC6	3223	HIPK3	10114	7.62076	0	0			CDO1	1036	RHOJ	57381	JAM2	58494	12.7783	1.53289	0
AGR2	10551	ETNK2	55224	XKRX	402415	7.61773	1.2476	0			CDO1	1036	CAV1	857	SOX17	64321	12.7625	0	0
AGR2	10551	KCNE1	3753	TK1	7083	7.61705	0	0			CDO1	1036	TGFBR3	7049	KIF20A	10112	12.7452	0.700878	0
AGR2	10551	SMARCA4	6597	AK3	50808	7.61191	0.08834	0			CDO1	1036	ANXA3	306	NDUFV1	4723	12.743	1.70548	0
AGR2	10551	PAQR5	54852	KIF12	113220	7.60444	0	0			CDO1	1036	KCNE1	3753	VPS37B	79720	12.7391	0	0
AGR2	10551	DLX4	1748	KCNE1	3753	7.6018	3.71608	0			CDO1	1036	CDH5	1003	C9orf26	90865	12.7317	4.05055	0
AGR2	10551	VPS37B	79720	CYYR1	116159	7.60115	0	0			CDO1	1036	RECQL4	9401	TPX2	22974	12.7283	0	0
AGR2	10551	EIF4G1	1981	CCBL2	56267	7.59039	2.03512	0			CDO1	1036	MRPL12	6182	NTNG1	22854	12.7029	0	0
AGR2	10551	HIST1H1B	3009	LPHN2	23266	7.58987	0.277297	0			CDO1	1036	CCNB2	9133	KIF2C	11004	12.6844	0	0
AGR2	10551	UGT8	7368	SH2D4A	63898	7.58967	0	0			CDO1	1036	KIF20A	10112	CDCA8	55143	12.6747	3.0496	0
AGR2	10551	CASP10	843	FZD4	8322	7.5792	0	0			CDO1	1036	CD34	947	CDH5	1003	12.6662	0.992857	0
AGR2	10551	DFFA	1676	CYYR1	116159	7.57693	0.910398	0			CDO1	1036	SELP	6403	JAM2	58494	12.6638	0	0
AGR2	10551	DACH1	1602	ERN2	10595	7.57399	0	0			CDO1	1036	SHMT2	6472	MRPS5	64969	12.6586	0.832909	0
AGR2	10551	TMOD3	29766	AKR1B10	57016	7.57279	1.56297	0			CDO1	1036	CDC20	991	CDCA5	113130	12.651	1.91852	0
AGR2	10551	PRRG1	5638	PAQR5	54852	7.56525	0	0			CDO1	1036	BIRC5	332	ENG	2022	12.6425	0	0
AGR2	10551	GPRC5C	55890	SETD3	84193	7.56492	1.29525	0			CDO1	1036	CDH6	1004	NOTCH4	4855	12.6194	0.784381	0
AGR2	10551	RNF5	6048	STARD7	56910	7.56289	0.860599	0			CDO1	1036	LDB2	9079	FAM107A	11170	12.6164	0.165235	0
AGR2	10551	NME5	8382	C9orf116	138162	7.562	10.3607	0			CDO1	1036	CALCRL	10203	CYYR1	116159	12.6159	1.09458	0
AGR2	10551	ASAH1	427	ELP3	55140	7.55993	0	0			CDO1	1036	MRPL12	6182	AOC3	8639	12.6072	1.76814	0
AGR2	10551	HIST1H1B	3009	HOXC6	3223	7.55983	0.694543	0			CDO1	1036	CA2	760	C9orf26	90865	12.6068	1.73062	0
AGR2	10551	SPTBN1	6711	SRM	6723	7.55976	0	0			CDO1	1036	HMMR	3161	CDCA5	113130	12.5905	0	0
AGR2	10551	FAM83E	54854	VPS37B	79720	7.5427	0	0			CDO1	1036	CD34	947	CDC25C	995	12.5868	0	0
AGR2	10551	VIP	7432	CYYR1	116159	7.53803	0	0			CDO1	1036	LMCD1	29995	SGIP1	84251	12.5801	0	0
AGR2	10551	LDB2	9079	RNF141	50862	7.53297	0.933673	0			CDO1	1036	MYH11	4629	TBX2	6909	12.5646	0	0
AGR2	10551	SPAG6	9576	GLIS3	169792	7.53253	7.42948	0			CDO1	1036	COX7A1	1346	LRRC32	2615	12.5641	0	0
AGR2	10551	PCDH17	27253	MMRN2	79812	7.52632	0	0			CDO1	1036	DKK3	27122	SLC24A3	57419	12.5631	0.846603	0
AGR2	10551	GTF3C2	2976	S100A3	6274	7.52158	0.758483	0			CDO1	1036	FAM107A	11170	C9orf26	90865	12.556	0	0
AGR2	10551	ASAH1	427	SETD3	84193	7.51899	0.220837	0			CDO1	1036	MYH11	4629	RHOJ	57381	12.549	0	0
AGR2	10551	FOXA3	3171	LRRC46	90506	7.5113	0	0			CDO1	1036	GJB1	2705	DUOX1	53905	12.5442	0	0
AGR2	10551	ACSL4	2182	SNRK	54861	7.5081	0	0			CDO1	1036	TCF21	6943	ADAMTS8	11095	12.5399	0	0
AGR2	10551	SLC35A1	10559	SPDEF	25803	7.50773	0	0			CDO1	1036	ENG	2022	LMNB2	84823	12.5394	2.15041	0
AGR2	10551	PSAT1	29968	CCBL2	56267	7.50452	0	0			CDO1	1036	RAMP2	10266	JAM2	58494	12.5331	0.79082	0
AGR2	10551	MAN2B1	4125	AZI2	64343	7.49646	0.26844	0			CDO1	1036	CDH6	1004	TEK	7010	12.5175	1.7373	0
AGR2	10551	UGT8	7368	SPAG8	26206	7.48964	0	0			CDO1	1036	GYPE	2996	SCN4B	6330	12.5102	0	0
AGR2	10551	GMDS	2762	KLC2	64837	7.48912	0	0			CDO1	1036	DKC1	1736	NUPL2	11097	12.4933	1.90781	0
AGR2	10551	ATP1A2	477	KCNK3	3777	7.48231	0	0			CDO1	1036	DACH1	1602	JAM2	58494	12.4818	0	0
AGR2	10551	FBXO15	201456	C6orf201	404220	7.48119	1.04152	0			CDO1	1036	EPRS	2058	SND1	27044	12.4524	0	0
AGR2	10551	ETNK2	55224	PYCRL	65263	7.47998	3.21557	0			CDO1	1036	NOTCH4	4855	CYYR1	116159	12.4483	0	0
AGR2	10551	STAC	6769	FZD7	8324	7.47843	0	0			CDO1	1036	LMNB2	84823	C1QTNF7	114905	12.4444	0	0
AGR2	10551	DOCK5	80005	CMYA5	202333	7.47443	2.93973	0			CDO1	1036	SLC7A5	8140	PCDH12	51294	12.4385	1.35698	0
AGR2	10551	MAN2B1	4125	SNRPA	6626	7.47366	0	0			CDO1	1036	E2F2	1870	KIF2C	11004	12.4326	0	0
AGR2	10551	PRRG2	5639	MAN1B1	11253	7.47358	5.92648	0			CDO1	1036	CA2	760	TRAP1	10131	12.4323	2.46303	0
AGR2	10551	IER3	8870	SPAG8	26206	7.47273	0	0			CDO1	1036	ADH1B	125	GPR146	115330	12.4259	0	0
AGR2	10551	ASAH1	427	HIPK3	10114	7.47047	3.29702	0			CDO1	1036	LDB2	9079	SH2D3C	10044	12.4073	2.64763	0
AGR2	10551	ABL1	25	GSTA5	221357	7.45315	0	0			CDO1	1036	CAV1	857	RHOJ	57381	12.4025	2.23164	0
AGR2	10551	CMYA5	202333	XKRX	402415	7.44997	0.427422	0			CDO1	1036	KIF2C	11004	CDCA5	113130	12.4003	0	0
AGR2	10551	TBX3	6926	FZD4	8322	7.44679	2.40074	0			CDO1	1036	TBX2	6909	PTTG1	9232	12.3959	2.67865	0
AGR2	10551	KPNA1	3836	PTPRN2	5799	7.44453	1.0526	0			CDO1	1036	MAD2L2	10459	VSIG2	23584	12.3816	3.86552	0
AGR2	10551	PTPRB	5787	SPTBN1	6711	7.4406	1.19659	0			CDO1	1036	KCNK3	3777	RHOJ	57381	12.3814	0	0
AGR2	10551	PRKCSH	5589	HKDC1	80201	7.44052	0.152181	0			CDO1	1036	EPS15	2060	ARL15	54622	12.3812	0.542057	0
AGR2	10551	ICAM2	3384	SPDEF	25803	7.4241	0	0			CDO1	1036	POLD2	5425	FHL5	9457	12.374	0.313723	0
AGR2	10551	ATP1A2	477	JAM2	58494	7.41878	0	0			CDO1	1036	TK1	7083	CDCA8	55143	12.3703	0.110061	0
AGR2	10551	ART4	420	SMARCA4	6597	7.41806	0	0			CDO1	1036	CA4	762	NTNG1	22854	12.366	0	0
AGR2	10551	ENTPD2	954	C15orf26	161502	7.4163	0.165485	0			CDO1	1036	RAMP3	10268	FAM107A	11170	12.3451	0	0
AGR2	10551	MAOB	4129	PAQR5	54852	7.41566	1.40548	0			CDO1	1036	CA2	760	HIGD1B	51751	12.3419	0	0
AGR2	10551	KCNK3	3777	JAM2	58494	7.41564	1.82605	0			CDO1	1036	COX7A1	1346	MYH11	4629	12.3093	0.0183814	0
AGR2	10551	ARMC4	55130	LOC646197	646197	7.4108	0.237567	0			CDO1	1036	CHL1	10752	PEAR1	375033	12.3073	2.49283	0
AGR2	10551	MAOB	4129	HKDC1	80201	7.40945	0	0			CDO1	1036	KIF2C	11004	TPX2	22974	12.2874	0	0
AGR2	10551	FZD7	8324	MGC13040	85016	7.40705	0	0			CDO1	1036	CD34	947	RAMP2	10266	12.2869	0	0
AGR2	10551	TBC1D20	128637	R3HCC1	203069	7.40547	0	0			CDO1	1036	CLEC3B	7123	RHOJ	57381	12.2725	2.22085	0
AGR2	10551	STAC	6769	IER3	8870	7.40005	0	0			CDO1	1036	CDC20	991	RAD52B	201299	12.2695	0	0
AGR2	10551	PAQR5	54852	CYYR1	116159	7.39465	0	0			CDO1	1036	SVEP1	79987	PLAC9	219348	12.256	0.228359	0
AGR2	10551	BCAR3	8412	WDR78	79819	7.39314	0.39638	0			CDO1	1036	GRK5	2869	MRPL12	6182	12.252	1.90391	0
AGR2	10551	AKR1B10	57016	DOCK5	80005	7.38702	0	0			CDO1	1036	CAV1	857	JAM2	58494	12.244	5.00087	0
AGR2	10551	BACE2	25825	BAIAP2L2	80115	7.38382	0	0			CDO1	1036	ANGPT1	284	CD34	947	12.2388	0.178852	0
AGR2	10551	YARS	8565	C14orf105	55195	7.38139	0	0			CDO1	1036	POLD2	5425	LPPR4	9890	12.2387	1.11759	0
AGR2	10551	ACSL4	2182	CCL25	6370	7.37849	0.46941	0			CDO1	1036	COX7A1	1346	HSPB7	27129	12.2322	0	0
AGR2	10551	EFNB2	1948	SMARCA4	6597	7.37769	1.37791	0			CDO1	1036	SHMT2	6472	SLC7A5	8140	12.2312	0.301877	0
AGR2	10551	CD36	948	SMAD6	4091	7.3747	0.683013	0			CDO1	1036	CAD	790	SNRK	54861	12.2291	0	0
AGR2	10551	PDE5A	8654	LDB2	9079	7.373	0.439708	0			CDO1	1036	HBD	3045	PAQR5	54852	12.2263	0	0
AGR2	10551	CASP10	843	PRDM7	11105	7.37206	0	0			CDO1	1036	SH2D3C	10044	HIGD1B	51751	12.2251	4.88429	0
AGR2	10551	MRPS31	10240	CCBL2	56267	7.36937	0	0			CDO1	1036	CAV1	857	SPARCL1	8404	12.2067	0.5512	0
AGR2	10551	BCHE	590	CA2	760	7.36652	1.2906	0			CDO1	1036	FHL1	2273	MRPL12	6182	12.1991	3.34059	0
AGR2	10551	APOL1	8542	EDIL3	10085	7.36605	2.0539	0			CDO1	1036	STAP2	55620	TMEM47	83604	12.1962	4.46201	0
AGR2	10551	HOXC6	3223	PLEKHF1	79156	7.36202	0	0			CDO1	1036	CFD	1675	RAMP2	10266	12.1955	0	0
AGR2	10551	SPAG6	9576	EDIL3	10085	7.36188	0	0			CDO1	1036	DKK3	27122	SGIP1	84251	12.1857	0.051529	0
AGR2	10551	STX1A	6804	GLS2	27165	7.35885	0	0			CDO1	1036	ADH1B	125	SVEP1	79987	12.1806	0.661148	0
AGR2	10551	SMAD6	4091	PTPRB	5787	7.35596	2.19731	0			CDO1	1036	BIRC5	332	CDCA8	55143	12.1778	0	0
AGR2	10551	ERN2	10595	SH2D4A	63898	7.3518	0	0			CDO1	1036	TTC1	7265	ABI3BP	25890	12.1735	0	0
AGR2	10551	ENTPD2	954	DACH1	1602	7.3486	0.36143	0			CDO1	1036	NOTCH4	4855	COX4I2	84701	12.1729	0	0
AGR2	10551	HSP90AB1	3326	PRKCSH	5589	7.3484	0	0			CDO1	1036	LPPR4	9890	JAM2	58494	12.17	0	0
AGR2	10551	SH2D4A	63898	DOCK5	80005	7.34637	0	0			CDO1	1036	KIF20A	10112	DONSON	29980	12.1549	1.4361	0
AGR2	10551	TK1	7083	WFDC1	58189	7.33983	0	0			CDO1	1036	RAMP2	10266	BDH2	56898	12.1542	0	0
AGR2	10551	EIF4G1	1981	AK3	50808	7.33919	0	0			CDO1	1036	CDO1	1036	CCDC68	80323	12.1487	0	0
AGR2	10551	KPNA1	3836	STUB1	10273	7.3357	2.55455	0			CDO1	1036	ENG	2022	CDT1	81620	12.1409	0	0
AGR2	10551	DDO	8528	RAVER2	55225	7.32961	0	0			CDO1	1036	RECK	8434	SND1	27044	12.1382	2.09804	0
AGR2	10551	HPGD	3248	SLC35A1	10559	7.3285	7.23771	0			CDO1	1036	TIE1	7075	PTTG1	9232	12.1333	0	0
AGR2	10551	ICAM2	3384	RNF141	50862	7.32338	0	0			CDO1	1036	PDE5A	8654	WFDC1	58189	12.1317	0	0
AGR2	10551	EFNB2	1948	P2RY4	5030	7.31408	0	0			CDO1	1036	SELP	6403	PKNOX2	63876	12.1282	0	0
AGR2	10551	GTF3C2	2976	HSP90AB1	3326	7.31298	0	0			CDO1	1036	CCL14	6358	RAMP3	10268	12.0903	0.0213396	0
AGR2	10551	DLL4	54567	VPS37B	79720	7.30828	0	0			CDO1	1036	TCF21	6943	FAM107A	11170	12.0881	0.520819	0
AGR2	10551	TNNT1	7138	RBM25	58517	7.3064	1.69921	0			CDO1	1036	LRRC32	2615	NOTCH4	4855	12.0866	0.88596	0
AGR2	10551	ICAM2	3384	IGSF22	283284	7.30623	0	0			CDO1	1036	FHL1	2273	SELP	6403	12.0865	0	0
AGR2	10551	MAN2B1	4125	SHANK2	22941	7.30349	0	0			CDO1	1036	E2F2	1870	CDCA5	113130	12.0854	6.86887	0
AGR2	10551	MUC5AC	4586	PAQR5	54852	7.29982	0	0			CDO1	1036	WNT11	7481	PDE5A	8654	12.0799	0.0226772	0
AGR2	10551	KPNA1	3836	TBC1D20	128637	7.29604	0	0			CDO1	1036	HRC	3270	PDGFRB	5159	12.0788	0	0
AGR2	10551	PCDH17	27253	JAM2	58494	7.28997	0.0714777	0			CDO1	1036	CDC25C	995	HIGD1B	51751	12.078	0.913823	0
AGR2	10551	RCC1	1104	DDO	8528	7.28614	0	0			CDO1	1036	INCENP	3619	C9orf26	90865	12.0534	0	0
AGR2	10551	MMRN2	79812	GSTA5	221357	7.28375	0.121825	0			CDO1	1036	CA2	760	ABCA9	10350	12.0526	0.386215	0
AGR2	10551	DACH1	1602	FAM107A	11170	7.28181	1.0433	0			CDO1	1036	TK1	7083	KIF20A	10112	12.0485	3.68434	0
AGR2	10551	PRRG2	5639	TOMM70A	9868	7.28079	1.51632	0			CDO1	1036	LAMC3	10319	CLEC14A	161198	12.0335	0	0
AGR2	10551	TOMM70A	9868	XKRX	402415	7.27742	0	0			CDO1	1036	INCENP	3619	TCF21	6943	12.0313	0	0
AGR2	10551	HOXC6	3223	DLL4	54567	7.2734	2.60515	0			CDO1	1036	MAMDC2	256691	C1orf186	440712	12.0255	0	0
[truncated: 39,610 more rows]

## Sheet: Differential score
Differential score and p values of 135 ranked genes under different CLR thresholds (δ=1.96:0.5:6.96)
EntrezID	δ=1.96		δ=2.46		δ=2.96		δ=3.46		δ=3.96		δ=4.46		δ=4.96		δ=5.46		δ=5.96		δ=6.46		δ=6.96
6690	8.99442	0	8.99442	5.55112e-16	9.36687	5.174e-06	9.65985	0.00491882	10.3839	0.00207524	10.9441	8.63276e-06	12.3849	1.39888e-14	12.8856	0	13.6833	0	14.2258	0	15.3121	0
9245	11.8541	3.19467e-12	11.8541	2.32122e-07	12.1249	9.96067e-06	12.3041	2.36125e-05	12.4903	0	13.2382	0	13.7137	0	15.0055	0	15.3181	0	15.718	0	16.1291	0
1917	8.91343	0	8.91343	0	9.07719	0	9.81852	2.06501e-13	10.4549	1.62129e-05	11.196	0.00560931	11.9418	0.000459574	12.8085	0	14.2055	0	14.7936	0	15.0212	0
4318	8.72165	0	8.72165	1.22125e-15	9.23924	4.136e-08	10.1284	0.00061825	11.6252	0.000430162	12.8666	0	13.754	0	15.0619	0	17.3678	0	19.5907	0	20.7121	0
768	8.1981	1.28786e-14	8.1981	1.30427e-08	8.36481	0.00160008	8.93135	0.00977919	9.68214	5.00242e-05	10.435	0	11.3194	0	11.5133	0	12.5848	0	12.6877	0	12.6799	0
2810	9.30213	0	9.30213	0	9.60646	0	10.4388	0	11.393	0	12.2769	0	13.1326	1.22125e-15	14.1049	0.000215696	15.0835	0.00291396	15.9676	0.00108248	16.848	2.37483e-05
6286	10.0773	0	10.0773	0	10.3267	2.75335e-14	10.8003	1.21271e-05	11.876	0.000385996	12.8283	0.000228988	13.2225	9.04338e-05	14.3365	8.47734e-06	14.8204	8.47455e-09	16.5219	0	17.5314	0
150696	9.49722	0	9.49722	0	9.81777	0	10.7688	0	11.7363	0	12.677	0	13.6432	0	14.6133	8.70415e-14	15.635	0.000639592	16.6266	0.000420252	17.5705	5.96208e-08
5003	6.50004	0.0107763	6.50004	0.00639501	6.50004	0.0122312	7.31214	7.42059e-08	7.85	0	7.47642	0	7.56211	0	0		0		0		0
1308	9.21613	0	9.21613	0	9.43467	0	9.97696	0.000248872	10.9152	0.000785686	12.0436	2.90616e-07	13.1109	6.20452e-08	14.0011	0	15.0283	0	15.4278	0	17.2191	0
1951	9.71278	3.85258e-10	9.71278	4.59611e-05	9.71278	0.00108836	10.1821	0.000200751	12.1477	2.77107e-08	12.8562	4.64931e-10	13.6952	0	17.2564	0	18.7292	0	18.7292	0	18.7292	0
3960	9.14181	0	9.14181	0	9.40347	0	10.4681	1.48517e-06	11.439	0.00116578	12.2126	0.000511377	13.6901	6.66092e-05	14.3915	1.55653e-13	15.7424	0	16.8269	0	18.0324	0
10537	8.31707	0	8.31707	1.34148e-10	8.68663	1.91954e-07	9.1988	0.00599701	9.88151	0.00433212	11.1077	1.12262e-06	12.1877	8.74317e-09	13.1961	0	14.4229	0	15.9652	0	16.3591	0
80201	10.079	3.49709e-06	10.079	7.42701e-05	10.4863	9.70476e-06	10.8992	4.23698e-08	12.4238	0	12.9615	0	14.3877	0	15.6833	0	21.6555	0	21.6555	0	21.6555	0
4600	10.6533	0	10.6533	0	10.9815	0	11.7957	2.01375e-05	13.049	0.000239721	13.8951	2.12461e-05	14.7304	1.78674e-10	15.806	7.51957e-11	16.0802	0	16.8881	0	17.5668	0
8672	8.35045	0	8.35045	0	8.63002	3.43059e-14	9.69748	0.000332615	10.5687	0.00267858	11.6475	0.000263676	12.553	1.00691e-07	13.3964	2.52836e-11	13.7248	4.64073e-13	14.811	0	15.2578	0
10551	9.66608	0	9.66608	0	9.99847	0	10.9194	0	11.8608	0	12.8366	0	13.7985	0	14.7595	7.57866e-10	15.7441	0.00120761	16.725	0.00121661	17.7159	0.000160753
79767	8.18498	0	8.18498	0	8.51142	7.85808e-11	9.08395	0.004508	10.1051	0.00397193	10.9022	0.000219773	11.17	3.469e-08	11.7441	0	13.1365	0	14.0111	0	16.2226	0
1356	8.25073	0	8.25073	0	8.48574	6.28165e-10	9.24046	0.0031205	10.0689	0.00207768	10.6107	8.46248e-09	11.4471	0	12.3107	0	13.3739	0	14.7387	0	16.2763	0
140686	11.2808	6.78616e-09	11.2808	5.29936e-06	11.4899	9.67506e-06	11.844	5.57519e-06	13.4109	1.08237e-07	14.4834	0	14.4834	0	15.4284	0	16.3685	0	16.3685	0	17.3623	0
23246	9.12732	0	9.12732	0	9.47775	0	10.2567	0	11.048	1.21816e-10	11.914	0.00130091	12.8879	0.000945704	13.6696	0.000717243	14.4105	3.75525e-08	15.5436	2.22045e-16	16.3141	0
999	8.95843	0	8.95843	0	9.24222	0	10.061	2.6938e-06	10.4873	0.00226823	11.323	0.00451404	12.4335	3.04461e-05	13.2884	7.6949e-06	14.0058	0	15.1691	0	15.9257	0
200634	8.44995	0	8.44995	0	8.72627	2.22045e-14	9.18412	5.03217e-05	9.86341	0.00287924	10.6264	3.51248e-07	11.8186	6.0987e-09	12.3253	0	12.8252	0	13.7984	0	15.1679	0
3224	8.49298	0	8.49298	2.22045e-16	8.75019	2.08802e-10	9.92301	0.000469442	10.4013	0.00496306	11.1248	0.00481648	11.3396	0.000246914	12.5498	1.8855e-07	13.0196	1.44329e-15	13.2796	0	14.0114	0
164091	8.32558	0	8.32558	0	8.56695	4.60243e-12	9.71843	0.000161536	10.4893	0.00137407	11.1671	1.32616e-06	12.0307	2.50244e-13	13.4492	0	14.318	0	15.4303	0	16.8791	0
84647	8.79315	0	8.79315	0	9.08991	0	9.84367	6.66596e-07	11.3249	0.00247952	12.4171	0.000303813	13.1109	2.97288e-07	13.735	1.42775e-13	14.9826	0	15.8103	0	16.7876	0
80117	9.73968	0	9.73968	0	10.0436	0	10.996	0	11.8976	9.99201e-16	12.8808	0.000205705	13.8593	0.000708881	14.921	9.87278e-06	15.6923	6.62012e-11	16.4404	0	17.272	0
1290	10.1578	0	10.1578	0	10.356	0	11.1346	8.95464e-11	12.2468	0.000133578	13.0459	0.000666734	13.7253	0.00032015	14.6816	2.328e-06	15.9807	1.89069e-08	16.5263	1.97912e-09	17.7486	3.9968e-15
1820	8.85195	0	8.85195	0	9.12922	0	9.8054	3.77905e-09	10.5156	0.000316061	11.4839	0.00357632	12.0097	0.000404891	12.8581	0	13.7957	0	15.0517	0	15.8611	0
54866	10.9968	5.83688e-09	10.9968	1.03142e-08	11.6645	0	11.6645	0	13.0576	0	13.0576	0	13.722	0	13.722	0	14.4146	0	16.688	0	16.688	0
2974	8.55537	5.15589e-05	8.55537	0.00132567	8.55537	0.00226163	9.6534	0	10.347	4.10783e-15	12.6043	0	13.8291	0	14.5727	0	15.3605	0	15.3605	0	15.3605	0
85456	10.9696	7.67715e-07	10.9696	0.000109753	10.9696	0.000136267	10.9696	2.18993e-08	11.9038	0	12.2022	0	12.6065	0	12.6065	0	13.8304	0	14.8638	0	16.0789	0
404093	8.03086	5.7952e-07	8.03086	0.000100197	8.21192	0.00653062	9.25449	2.68762e-06	9.63204	5.60559e-08	10.1746	0	10.3295	0	10.5472	0	10.3281	0	10.9904	0	11.6289	0
11322	9.33687	0	9.33687	0	9.632	0	10.4028	0	11.1616	0	12.052	5.30446e-06	12.8922	0.00325102	13.6988	2.29798e-08	14.6565	2.14118e-12	15.716	0	16.4642	0
6790	9.20466	0	9.20466	0	9.53307	2.93876e-13	10.3058	0.0001886	10.9939	0.00262135	11.6862	0.000758088	12.6278	1.0676e-09	13.4933	0	14.4842	0	15.252	0	16.5082	0
5794	10.645	0	10.645	0	10.7973	0	11.5512	0	12.2806	0	12.9678	8.98281e-13	13.8867	0.0002771	14.9406	0.000696181	15.6477	0.000100706	16.361	4.65093e-06	17.7563	4.77396e-14
7498	0		0		0		0		0		0		0		0		0		0		0
84033	8.81979	0	8.81979	0	9.09382	0	9.859	3.10862e-15	10.8612	3.22887e-05	11.5911	0.00386483	12.402	0.000922299	13.2901	1.74083e-06	14.5992	7.17724e-11	15.2101	0	16.7456	0
64761	8.20625	1.02528e-11	8.20625	3.75047e-06	8.40418	0.00466899	8.84939	0.00899185	9.61222	2.23701e-05	10.3452	0	11.9437	0	12.891	0	13.2253	0	13.8072	0	16.2725	0
9536	8.58101	0	8.58101	0	8.94977	1.6831e-13	10.0927	7.9297e-05	10.7076	0.00289247	11.4684	9.83996e-05	12.2447	3.60267e-12	13.1664	0	14.7517	0	15.3797	0	16.9239	0
2191	8.55869	7.77156e-15	8.55869	9.85815e-09	8.73481	8.56587e-05	9.63188	0.00623812	10.4606	0.00427089	11.1185	3.62973e-05	12.429	3.47278e-13	14.0673	0	14.5284	0	16.2126	0	17.2998	0
140576	9.44055	0	9.44055	0	9.79099	0	10.6497	0	11.5452	2.59114e-05	12.2659	0.00191289	13.0569	0.000245279	14.2578	4.12383e-08	15.4752	1.11022e-16	16.5047	0	17.5342	0
1186	9.02278	0	9.02278	0	9.3385	0	10.2578	0	11.1848	0	12.119	2.33223e-07	13.5044	0.00113192	14.3466	0.000218716	15.2358	3.48725e-06	16.4401	0	17.3639	0
57817	8.29401	3.91729e-06	8.29401	5.44016e-05	8.60401	0.00493503	8.92499	0.00670552	10.4698	6.85713e-11	11.5104	1.33789e-11	13.4092	0	13.7985	0	15.0602	0	16.8498	0	16.8498	0
8320	7.83373	0	7.83373	0	8.05516	0	8.65831	0	9.39171	1.04336e-08	10.2424	0.0102439	11.0078	0.00312549	11.6334	0	12.3857	0	13.2688	0	14.4403	0
80008	9.31334	0	9.31334	0	9.61702	0	10.3428	0	11.0455	0	11.7319	6.17284e-14	12.3796	0.00548414	13.1176	0.00126586	13.8158	4.44089e-16	14.4706	0	15.1944	0
55775	7.67055	0	7.67055	5.55112e-16	7.80692	3.75493e-09	8.08742	1.42338e-05	8.44454	0.0204969	8.65143	0.0613763	8.8384	0.0101915	8.97453	6.59122e-06	9.03696	0	8.8042	0	8.81091	0
3112	8.29076	0	8.29076	0	8.78288	1.37668e-14	9.71643	0.00152437	10.4105	0.00395665	11.0423	2.67896e-05	12.441	5.23508e-07	13.5097	7.12663e-12	14.0257	0	15.3365	0	16.1375	0
1294	8.58792	9.11405e-07	8.58792	0.000292163	9.04507	0.00132496	9.59226	0.00285154	10.0297	3.44444e-07	10.7445	0	12.925	0	14.6679	0	14.6679	0	16.1119	0	23.9927	0
26173	8.73112	1.5099e-14	8.73112	3.55143e-09	8.80208	0.00137071	9.56465	0.00337979	10.3704	0.000319921	11.4363	2.27148e-08	11.5988	2.9976e-15	12.8655	0	13.6691	0	14.6096	0	14.9779	0
196	8.96493	0	8.96493	0	8.96493	6.27467e-08	9.72715	0.00236733	11.1813	0.000276387	11.9738	7.94176e-07	12.5312	1.61415e-12	13.133	4.32034e-11	13.6973	0	14.0291	0	14.4285	0
9256	8.59614	7.91613e-08	8.59614	0.000103692	8.85942	0.00308624	8.97715	0.00440285	9.39911	1.04509e-05	10.2821	7.59169e-11	10.4242	0	11.3157	0	11.7357	0	13.7195	0	15.2782	0
3899	8.01012	0	8.01012	0	8.16629	3.92412e-11	9.01908	0.000441312	10.0236	0.00741722	11.7506	5.45077e-06	13.2347	1.11022e-16	14.2727	0	14.5606	0	15.766	0	17.6513	0
5887	8.67326	0	8.67326	0	8.88081	6.30918e-12	9.75065	3.21748e-05	10.4433	0.00316566	11.1895	0.00517308	11.7376	1.30671e-05	12.7715	0	14.4856	0	15.604	0	16.74	0
8900	9.57345	3.94218e-05	9.57345	2.43972e-05	9.57345	2.82645e-06	10.3925	6.95824e-08	10.3925	2.59814e-09	10.3925	1.09912e-14	11.5536	0	14.35	0	14.35	0	14.35	0	14.35	0
55742	9.35665	0	9.35665	0	9.74345	0	10.8019	1.04251e-08	11.6147	0.000504489	12.2961	0.00199324	13.0917	0.000361328	14.7033	3.8355e-08	15.5211	1.86362e-12	16.0875	0	16.9127	0
7169	8.17475	0	8.17475	0	8.51616	2.39995e-09	9.08151	0.00010185	9.69186	0.00533307	10.6116	0.00556689	11.4633	0.00412756	12.0361	6.3783e-06	13.2305	1.00439e-10	13.7863	4.17132e-10	14.5328	0
51294	7.85222	0.000866351	7.85222	0.00161827	7.85222	0.00380518	7.85222	3.61928e-09	8.24843	0	8.76973	0	10.36	0	12.2409	0	12.2409	0	12.2409	0	12.2409	0
6405	9.01902	0	9.01902	0	9.3551	0	10.43	0.000609274	11.4471	0.000785576	12.0347	0.000289949	12.5389	1.35582e-07	13.063	2.84933e-08	13.7576	0	15.9957	0	17.8091	0
10673	10.1508	0	10.1508	0	10.3621	0	10.8911	0	11.528	0	12.0861	0	12.6356	0	13.2325	1.45141e-09	13.8241	0.00024311	14.3989	0.0062515	15.1019	0.00509034
7133	10.8982	0	10.8982	0	11.0856	0	11.5689	0	12.1727	0	12.7362	0	13.29	9.66014e-10	13.9964	0.00234774	14.6891	0.00104279	15.3791	0.00052003	16.1305	1.38481e-05
22903	8.30054	0	8.30054	3.55271e-15	8.55998	3.77566e-08	9.21045	0.00688645	10.2965	0.000563359	11.4351	8.97462e-05	12.1422	2.06181e-07	12.5425	0	13.5675	0	14.002	0	15.3273	0
4481	11.7657	1.37295e-08	11.7657	1.55923e-07	11.7657	9.19467e-09	11.7657	2.51405e-08	13.1443	7.30527e-14	13.1443	0	13.7957	0	14.8255	0	14.8255	0	15.4659	0	17.3731	0
91694	8.31501	3.33067e-16	8.31501	4.89946e-09	8.64278	0.00164711	9.53483	0.00548653	10.1371	0.00268729	10.5654	0.000834017	13.0202	0	15.2717	0	16.5653	0	17.3185	0	18.6857	0
2787	9.20368	0	9.20368	0	9.38131	0	10.2803	1.37839e-08	11.1821	0.00192258	12.5024	0.000162102	13.4722	1.1558e-09	14.6251	0	15.5939	0	16.7354	0	17.5196	0
127435	10.0405	0	10.0405	0	10.2823	0	10.9855	0	11.8088	0	12.6143	0	13.4732	3.60145e-12	14.1858	0.000296912	14.9836	0.0013125	15.921	0.00219649	16.7422	0.000636735
8321	9.02421	0	9.02421	0	9.41096	0	10.246	0	11.1246	3.06499e-12	12.013	9.25724e-07	12.8132	0.00230398	13.7472	0.0036105	14.5701	0.000806163	15.3021	5.87573e-07	16.1092	0
5868	9.63183	0	9.63183	0	10.0283	0	10.8005	4.68353e-11	11.5754	0.000213253	12.2329	0.00245736	13.0097	0.000184798	14.07	2.83938e-07	14.8956	0	16.5869	0	17.3207	0
10253	9.17322	0	9.17322	0	9.472	0	10.1817	0	10.9502	5.40161e-06	11.8597	0.00304235	12.8627	0.000204127	13.9171	7.51325e-05	14.8208	4.46987e-12	15.8446	0	16.4881	0
11167	10.5965	3.5795e-07	10.5965	3.07295e-05	10.5965	0.000188655	11.8359	3.22063e-05	11.8359	1.6592e-11	12.6764	0	14.6516	0	15.0916	0	15.5978	0	15.5978	0	20.057	0
55529	8.20017	0	8.20017	2.36745e-09	8.52619	0.000304656	9.52574	0.00498084	10.062	0.000108194	11.3384	1.14591e-08	11.4687	4.41547e-12	12.6761	0	14.7215	0	15.5249	0	16.0982	0
9332	8.7512	0	8.7512	0	9.07913	3.98748e-12	9.92621	0.00232761	11.0023	0.000429715	11.9893	1.31322e-11	12.7752	0	13.9486	0	14.6718	0	15.9235	0	16.9025	0
7225	7.71893	0.00028285	7.71893	0.000147895	7.71893	0	10.7715	0	10.7715	0	14.6492	0	14.6492	0	14.6492	0	14.6492	0	14.6492	0	14.6492	0
3426	9.84724	0	9.84724	0	10.114	0	11.0193	0	11.8929	0	12.9321	0.000119652	13.7714	0.00134251	14.8844	7.19228e-05	15.9317	3.20322e-12	16.9244	6.14697e-12	17.9197	0
4092	9.19881	0	9.19881	0	9.47579	0	10.0567	8.38441e-05	11.2763	0.00108196	12.1799	9.60689e-06	13.1331	4.0782e-08	14.0204	0	15.6443	0	16.5385	0	18.2601	0
7940	0		0		0		0		0		0		0		0		0		0		0
59	10.6054	0	10.6054	1.39961e-10	10.8762	3.46013e-05	11.3038	0.000218725	11.8528	4.12005e-05	12.5633	1.71339e-07	12.5633	0	13.1336	0	14.1532	0	14.9357	0	16.5527	0
966	8.39018	0	8.39018	1.88738e-15	8.63815	6.48093e-06	9.28454	0.00338784	10.287	0.00330313	10.9578	1.12731e-05	11.9043	0	12.7765	0	14.228	0	15.6507	0	16.7359	0
51776	8.57861	0	8.57861	0	8.81354	0	9.9938	6.84296e-09	10.7101	0.000893345	11.5382	0.00502369	12.3909	0.00115755	13.6458	1.46572e-05	14.0716	1.48178e-08	14.9963	0	15.7317	0
8988	9.375	0	9.375	0	9.67966	8.89852e-10	10.539	0.000467531	11.1347	0.00162952	11.9815	0.0014759	12.8829	6.83348e-08	13.3893	0	13.9724	0	14.6379	0	15.3679	0
8605	12.4985	7.77156e-16	12.4985	0	12.4985	0	12.4985	0	13.8701	0	13.8701	0	15.2617	0	18.4294	0	18.4294	0	18.4294	0	18.4294	0
1794	10.2079	0	10.2079	0	10.334	0	11.2232	3.33067e-16	12.2782	2.90211e-07	12.7778	0.00253964	13.8195	2.83142e-05	15.3093	5.69766e-13	16.5706	0	17.3887	0	17.8922	0
5327	11.2463	0	11.2463	0	11.4667	0	12.054	4.68741e-09	12.8844	2.38432e-05	13.6907	0.000245	14.5489	3.18667e-05	14.9758	4.33096e-06	15.9453	7.25277e-10	17.0521	0	17.6264	0
85409	8.93055	0	8.93055	4.44089e-16	9.23423	1.71977e-07	9.83888	6.52376e-05	11.0866	0.000620546	11.4108	3.83685e-05	12.4128	1.84519e-13	13.0667	0	13.3222	0	13.5101	0	14.3933	0
81849	9.7437	1.13497e-05	9.7437	0.000251903	9.7437	0.000170372	10.0933	5.21669e-05	12.2893	0	13.8481	0	15.2102	0	20.7666	0	20.7666	0	20.7666	0	20.7666	0
58189	9.28577	0	9.28577	5.30687e-14	9.74354	7.68056e-08	10.6821	0.000764799	11.5217	0.00107711	12.4844	0.000448055	14.138	4.32645e-06	15.2789	4.37428e-12	16.5914	1.21014e-14	16.5914	0	17.1172	0
7805	8.38195	0	8.38195	0	8.65688	0	9.13954	7.59393e-14	9.74576	5.58907e-06	10.43	0.00732559	11.2109	0.00621756	11.9688	4.96213e-05	12.8408	1.85437e-05	13.9893	1.42253e-12	14.5545	4.44089e-16
10449	8.70137	0	8.70137	0	9.05653	3.08384e-11	10.1748	0.000334486	11.2301	0.00228411	12.707	0.000284971	13.4765	1.11489e-09	14.0933	0	14.8903	0	16.2744	0	16.8202	0
4837	9.57151	0	9.57151	7.40184e-10	9.88905	2.45853e-06	10.4956	0.000436923	11.8515	0	12.0274	0	12.8559	0	14.4048	0	14.8406	0	15.2871	0	17.7154	0
4681	9.29661	0	9.29661	0	9.37424	1.47863e-08	10.3462	9.76733e-05	11.3233	0.00135464	12.707	4.47768e-05	13.0592	1.02119e-05	13.8087	4.98599e-08	14.4573	0	15.7326	0	16.086	0
6146	8.46121	0	8.46121	0	8.85402	1.11022e-16	9.52907	8.42658e-05	10.277	0.004845	10.8497	0.00391421	11.5585	6.51391e-08	12.038	0	13.0401	0	13.8045	0	15.072	0
2022	9.05185	0	9.05185	0	9.2784	0	9.94891	5.73413e-09	10.6793	0.0039653	11.3449	0.00469058	12.0274	1.7219e-05	12.7962	1.34137e-06	13.4843	0	14.7276	0	15.4124	0
7052	8.73344	0	8.73344	0	8.97718	0	9.85045	4.88498e-15	10.8735	2.15241e-05	11.8723	0.00164148	12.9395	3.63325e-05	14.05	6.93573e-10	14.9917	2.37508e-11	15.8875	4.88498e-15	16.9427	0
91663	8.23764	1.28308e-12	8.23764	7.08483e-07	8.55502	0.00332069	9.21159	0.00837343	10.2711	0.00139207	11.0416	2.7569e-07	13.35	0	14.1389	0	16.4237	0	16.4237	0	16.9988	0
79746	9.06547	0	9.06547	3.24511e-10	9.32953	4.23248e-05	9.88941	0.00389049	11.0406	0.000113606	11.8684	7.38766e-06	12.9077	1.78575e-09	14.5261	0	15.6804	0	16.1508	0	17.2385	0
3684	8.67284	0	8.67284	0	8.88562	0	9.50791	0	10.1187	0	10.7702	0	11.3943	0	12.043	5.55112e-16	12.754	0.000364843	13.5665	0.0107895	14.35	0.00215508
1012	9.90548	0	9.90548	0	10.1985	1.11022e-16	11.0218	2.5958e-05	12.2514	0.000503255	12.9323	0.000333564	13.4693	0.000108876	14.5361	1.1156e-06	15.5511	5.32907e-15	15.9274	0	16.6117	0
81575	9.19674	0	9.19674	3.89688e-13	9.28105	3.43071e-08	9.95848	0.00139275	11.2645	7.48837e-05	11.7356	1.50096e-07	13.0266	2.76671e-10	14.4039	0	14.7874	0	15.857	0	16.1644	0
116441	9.42233	0	9.42233	0	9.64937	0	10.4423	4.49124e-08	11.2955	0.00190267	12.1841	0.00100452	12.9846	5.1036e-05	13.7175	1.72505e-08	14.4663	0	15.2718	0	16.1229	0
8660	8.69236	0	8.69236	0	9.00473	0	9.8685	0	10.8882	0.000564346	11.4886	0.00149913	12.4695	7.18257e-05	13.216	5.12298e-09	14.0248	0	14.6014	0	15.6098	0
33	8.62561	0	8.62561	6.3014e-12	8.96996	4.12338e-08	9.80065	0.00386738	10.8703	0.0020545	11.5562	0.000541234	12.2132	3.27797e-10	12.6664	0	15.3156	0	17.5235	0	18.2494	0
30008	12.1778	1.05471e-14	12.1778	1.11022e-16	12.1778	1.88738e-15	12.1778	0	12.1778	0	13.9581	0	13.9581	0	13.9581	0	13.9581	0	13.9581	0	14.5642	0
64321	10.2185	0	10.2185	0	10.5451	0	11.4518	0	12.4104	0	13.3686	0	14.3245	0	15.2858	0	16.2319	0	17.2106	3.39346e-07	18.1546	0.0014683
5225	8.78267	0	8.78267	0	8.99047	0	9.85998	7.42396e-07	10.6478	0.00370965	11.4878	0.00062472	12.0253	1.35036e-07	12.646	5.21805e-15	13.3565	0	15.0857	0	15.7751	0
1842	8.69635	0	8.69635	0	9.02462	0	9.50029	4.9667e-11	10.2832	0.000153071	10.8817	0.00920581	11.6815	0.00787878	12.7145	0.00191021	13.5274	1.41315e-05	14.3918	2.21914e-07	14.7368	4.3247e-09
6678	10.2786	0	10.2786	0	10.5826	0	11.139	0	11.9179	3.34949e-10	12.6175	0.000108081	13.2555	0.000975994	13.9865	0.000216522	14.8616	8.65219e-07	15.7793	1.25731e-11	16.9308	0
2202	8.46477	0	8.46477	3.10862e-15	8.51214	0.00011509	9.09542	0.00750524	9.57028	0.00430155	10.1273	0	11.6334	0	13.0348	0	13.8241	0	14.5149	0	15.0952	0
9022	9.47338	0	9.47338	0	9.80144	0	10.6988	0	11.6228	0	12.5584	0	13.5173	0	14.4018	0	15.3942	1.45139e-12	16.4417	0.00133143	17.4093	0.00291028
6456	9.45678	0	9.45678	3.21965e-15	9.93659	7.45512e-05	10.7911	0.00174162	12.0901	6.61149e-06	13.3	0	14.2542	0	14.9556	0	15.1678	0	16.6528	0	17.3628	0
2205	9.43842	0	9.43842	4.76297e-12	9.43842	0.000411969	9.78745	0.00325237	10.1724	0.000470839	10.6736	0.000428858	11.4051	0	11.8992	0	13.7436	0	14.3207	0	14.4663	0
94	0		0		0		0		0		0		0		0		0		0		0
6368	9.32406	3.33067e-16	9.32406	4.02034e-10	9.42214	0.00116724	10.9928	9.01177e-05	12.1873	1.15593e-06	12.6144	7.66054e-15	13.0731	0	13.6193	0	15.1474	0	15.8239	0	15.8239	0
8706	8.2077	0	8.2077	8.48832e-12	8.42078	1.87629e-05	9.39666	0.00397947	10.2056	0.000955378	11.2944	9.80453e-08	12.4162	0	13.0174	0	14.4445	0	14.8636	0	15.3961	0
5797	8.80304	0	8.80304	8.78186e-14	9.01743	8.58166e-05	9.64666	0.00292779	10.1409	0.00224379	11.3773	1.81226e-07	13.1235	3.33067e-16	14.0226	0	15.0794	0	15.2976	0	15.584	0
2701	9.25554	0	9.25554	0	9.54422	0	10.38	6.71422e-07	11.0712	0.00275061	12.0058	0.000393309	13.0588	9.97513e-12	13.9635	0	14.7336	0	15.8833	0	16.7091	0
4118	9.46902	0	9.46902	0	9.78692	0	10.6518	0	11.5025	0	12.4568	0	13.3162	0	14.218	0	15.1293	0	16.0014	6.5568e-06	16.9116	0.00270295
1036	9.81442	0	9.81442	0	10.1276	0	11.0033	0	11.9226	0	12.8467	0	13.8249	0	14.753	0	15.6942	0	16.635	0	17.6117	6.59258e-10
126393	8.73137	0	8.73137	0	9.11202	1.65973e-06	9.95104	0.00344228	10.5859	0.000891607	11.6589	3.58891e-05	12.4523	7.56098e-06	13.1987	8.86748e-11	14.2822	0	15.7461	0	16.9941	0
5507	8.83952	0	8.83952	0	9.05166	0	10.0338	9.99201e-16	10.8989	2.56026e-08	12.0239	0.00260301	12.7339	0.00167459	13.5933	0.000222129	14.2818	1.61995e-06	15.2904	0	16.0236	0
51267	8.46246	0	8.46246	3.02647e-13	8.65947	2.86767e-07	9.64125	0.00589901	10.0764	7.24744e-06	11.0869	2.63158e-08	11.7884	1.26565e-14	12.913	0	14.5944	0	15.6466	0	17.5018	0
26353	9.24209	0	9.24209	0	9.4957	0	10.3536	0	11.2253	0	11.8954	5.15718e-05	12.5676	0.00241628	13.2503	0.00253304	14.0146	0.00152386	14.8949	1.17427e-05	15.8144	0
2947	9.68006	0	9.68006	4.21885e-15	9.87913	4.0604e-07	10.5435	0.0013351	11.2936	0.000356505	11.827	1.33054e-08	12.8384	0	13.9478	0	15.4328	0	17.2128	0	17.5967	0
9200	8.69969	1.21759e-10	8.69969	8.70224e-06	8.92662	0.00226491	10.2024	7.75073e-06	10.7818	2.35874e-08	11.2776	0	13.0204	0	13.9049	0	15.501	0	15.9035	0	16.4268	0
112464	9.76113	0	9.76113	0	10.208	0	10.715	1.11737e-05	11.5588	0.000766361	12.5641	0.000643539	12.9927	6.64086e-06	13.8002	4.996e-15	15.0489	0	15.692	0	16.0317	0
8404	11.298	0	11.298	0	11.6007	0	12.8658	0	13.9041	0	14.9208	1.40219e-07	16.0118	2.02137e-05	16.7902	0.000140535	17.818	4.83497e-08	18.6919	1.01183e-08	19.6399	5.32907e-15
366	9.50309	0	9.50309	0	9.7144	1.88738e-15	10.2881	0.00163749	11.2483	0.00338011	11.9077	3.58883e-07	13.5718	1.11022e-16	13.9894	0	14.9574	0	15.6649	0	16.5487	0
12	8.75046	0	8.75046	0	9.07445	0	9.90842	0	11.0497	1.95171e-07	11.9627	0.0014244	12.7393	0.00154543	13.4519	2.27869e-06	14.3734	4.74398e-13	15.2979	0	16.6762	0
6275	9.37291	0	9.37291	0	9.76648	0	10.5838	0	11.3945	7.17204e-14	12.2088	1.24389e-05	12.9733	0.00202002	14.0127	4.17973e-05	15.0976	4.94629e-07	15.9506	0	16.8185	0
256691	10.8327	0	10.8327	0	11.0356	0	11.7459	0	12.4775	4.44089e-16	13.2746	4.53977e-07	13.9859	0.00110252	14.7838	0.000199346	15.7719	1.85389e-05	16.7312	9.07059e-10	17.4572	3.23852e-12
6943	10.8309	0	10.8309	0	11.1434	0	11.9771	0	12.8171	0	13.6646	0	14.57	0	15.4504	3.33067e-16	16.32	0.000478328	17.1968	0.000881165	18.1709	7.39654e-05
1410	11.2463	1.11022e-16	11.2463	2.90367e-09	11.8862	1.41145e-05	12.5869	1.73284e-05	13.7629	7.5478e-06	14.5082	3.8389e-10	15.0961	0	16.4391	0	17.4629	0	17.8617	0	19.7489	0
3040	9.4733	0	9.4733	0	9.76292	0	10.5663	0	11.2919	0	12.1961	8.32667e-15	13.1528	7.04931e-06	14.0787	0.00182523	14.9666	0.000997143	15.8809	1.37462e-05	16.847	2.85008e-08
3039	9.7646	0	9.7646	0	10.0108	0	10.5331	8.10463e-15	11.3192	8.99537e-06	12.1744	0.00211764	12.8208	0.000470161	13.7165	1.51277e-05	14.5112	1.74449e-11	15.1251	0	15.7439	0
177	8.55288	0	8.55288	7.97028e-11	8.83836	0.00111804	9.50899	0.00537755	10.4892	1.66976e-06	11.8589	0	12.4354	0	13.3172	0	13.3172	0	16.3094	0	17.4583	0
11170	14.9047	0	14.9047	0	14.9929	0	15.3389	3.34883e-07	15.8818	4.14149e-06	16.302	7.79513e-06	16.852	2.5894e-06	17.3274	1.11022e-16	17.6468	0	18.8703	0	19.865	0

## Sheet: Standard_Lit
ACVRL1	94	PMID: 23743928
AGER	177	PMID: 24108211;PMID: 19895173
AQP9	366	PMID: 19100828
CA9	768	PMID: 11691824
CDH13	1012	PMID: 9737784;PMID: 11389090
CDO1	1036	PMID: 24486589
CLEC1A	51267	PMID: 22613842
CP	1356	PMID: 6943365
CRYAB	1410	PMID: 25048725
EEF1A2	1917	PMID: 24510995
EFEMP1	2202	PMID: 25676403
ELMO3	79767	PMID: 26191257
FAM107A	11170	PMID: 25753555
GCNT3	9245	PMID: 25421439
GSTM3	2947	PMID: 15069685;PMID: 9918133
HSPB6	126393	PMID: 24840475
LGALS4	3960	PMID: 22613842
MAL	4118	PMID: 23381221
MAMDC2	256691	PMID: 22613842
MMP9	4318	PMID: 23640949
MX2	4600	PMID: 14755238
PROM2	150696	PMID: 22613842
S100A4	6275	PMID: 24732359
S100P	6286	PMID: 18575778
SFN	2810	PMID: 26223682
SH3GL2	6456	PMID: 22968441
SOX17	64321	PMID: 22846201
SPARC	6678	PMID: 23114088
TCF21	6943	PMID: 16415157

## Sheet: Standard_Sel
ACVRL1	94
AGR2	10551
CDH13	1012
CDO1	1036
CELSR3	1951
CLEC1A	51267
CLIC3	9022
COL5A2	1290
DOCK2	1794
EEF1A2	1917
EFEMP1	2202
HBA1	3039
MAL	4118
MAMDC2	256691
MX2	4600
PROM2	150696
SFN	2810
SOX17	64321
SPARCL1	8404
